# Supplementary material for: First insight into the somatic mutation burden of neurofibromatosis type 2-associated grade I and grade II meningiomas: a case report comprehensive genomic study of two cranial meningiomas with vastly different clinical presentation
Source: PubMed Central journal article supplement (PMC5307647; doi:10.1186/s12885-017-3127-6), 2017-02-13
Supplement: 12885_2017_3127_MOESM2_ESM.pdf [file 12885_2017_3127_MOESM2_ESM.pdf]

**Additional File 2.** Losses, gains and regions with allelic imbalance in the grade I meningioma and all four fragments of the grade II meningioma

| <b>Region</b>             | <b>Genomic Event</b> | <b>Sample Name</b> | <b>Participation</b> |
|---------------------------|----------------------|--------------------|----------------------|
| chr1:0-2,342,520          | Allelic Imbalance    | Grade1             | Absent               |
| chr1:0-2,342,520          | Allelic Imbalance    | Grade2-1           | Absent               |
| chr1:0-2,342,520          | Allelic Imbalance    | Grade2-2           | Absent               |
| chr1:0-2,342,520          | Allelic Imbalance    | Grade2-4           | Absent               |
| chr1:0-2,342,520          | Allelic Imbalance    | Grade2-3           | Complete             |
| chr1:1,239,637-1,296,372  | Loss                 | Grade1             | Absent               |
| chr1:1,239,637-1,296,372  | Loss                 | Grade2-1           | Absent               |
| chr1:1,239,637-1,296,372  | Loss                 | Grade2-3           | Absent               |
| chr1:1,239,637-1,296,372  | Loss                 | Grade2-4           | Absent               |
| chr1:1,239,637-1,296,372  | Loss                 | Grade2-2           | Complete             |
| chr1:1,709,577-6,110,409  | Loss                 | Grade1             | Absent               |
| chr1:1,709,577-6,110,409  | Loss                 | Grade2-1           | Partial              |
| chr1:1,709,577-6,110,409  | Loss                 | Grade2-2           | Partial              |
| chr1:1,709,577-6,110,409  | Loss                 | Grade2-3           | Partial              |
| chr1:1,709,577-6,110,409  | Loss                 | Grade2-4           | Partial              |
| chr1:3,372,743-6,110,409  | Allelic Imbalance    | Grade1             | Absent               |
| chr1:3,372,743-6,110,409  | Allelic Imbalance    | Grade2-1           | Partial              |
| chr1:3,372,743-6,110,409  | Allelic Imbalance    | Grade2-2           | Partial              |
| chr1:3,372,743-6,110,409  | Allelic Imbalance    | Grade2-3           | Partial              |
| chr1:3,372,743-6,110,409  | Allelic Imbalance    | Grade2-4           | Partial              |
| chr1:6,313,247-8,172,796  | Allelic Imbalance    | Grade1             | Absent               |
| chr1:6,313,247-8,172,796  | Allelic Imbalance    | Grade2-3           | Absent               |
| chr1:6,313,247-8,172,796  | Allelic Imbalance    | Grade2-4           | Complete             |
| chr1:6,313,247-8,172,796  | Allelic Imbalance    | Grade2-1           | Partial              |
| chr1:6,313,247-8,172,796  | Allelic Imbalance    | Grade2-2           | Partial              |
| chr1:6,313,247-8,181,652  | Loss                 | Grade1             | Absent               |
| chr1:6,313,247-8,181,652  | Loss                 | Grade2-1           | Partial              |
| chr1:6,313,247-8,181,652  | Loss                 | Grade2-2           | Partial              |
| chr1:6,313,247-8,181,652  | Loss                 | Grade2-3           | Partial              |
| chr1:6,313,247-8,181,652  | Loss                 | Grade2-4           | Partial              |
| chr1:8,276,853-8,996,085  | Loss                 | Grade1             | Absent               |
| chr1:8,276,853-8,996,085  | Loss                 | Grade2-3           | Absent               |
| chr1:8,276,853-8,996,085  | Loss                 | Grade2-1           | Partial              |
| chr1:8,276,853-8,996,085  | Loss                 | Grade2-2           | Partial              |
| chr1:8,276,853-8,996,085  | Loss                 | Grade2-4           | Partial              |
| chr1:9,063,095-9,135,973  | Loss                 | Grade1             | Absent               |
| chr1:9,063,095-9,135,973  | Loss                 | Grade2-2           | Complete             |
| chr1:9,063,095-9,135,973  | Loss                 | Grade2-1           | Partial              |
| chr1:9,063,095-9,135,973  | Loss                 | Grade2-3           | Partial              |
| chr1:9,063,095-9,135,973  | Loss                 | Grade2-4           | Partial              |
| chr1:9,610,456-10,447,333 | Loss                 | Grade1             | Absent               |
| chr1:9,610,456-10,447,333 | Loss                 | Grade2-1           | Partial              |

|                                              |          |          |
|----------------------------------------------|----------|----------|
| chr1:9,610,456-10,447,333 Loss               | Grade2-2 | Partial  |
| chr1:9,610,456-10,447,333 Loss               | Grade2-3 | Partial  |
| chr1:9,610,456-10,447,333 Loss               | Grade2-4 | Partial  |
| chr1:10,976,898-11,506,265 Loss              | Grade1   | Absent   |
| chr1:10,976,898-11,506,265 Loss              | Grade2-1 | Partial  |
| chr1:10,976,898-11,506,265 Loss              | Grade2-2 | Partial  |
| chr1:10,976,898-11,506,265 Loss              | Grade2-3 | Partial  |
| chr1:10,976,898-11,506,265 Loss              | Grade2-4 | Partial  |
| chr1:11,606,557-11,836,963 Loss              | Grade1   | Absent   |
| chr1:11,606,557-11,836,963 Loss              | Grade2-1 | Partial  |
| chr1:11,606,557-11,836,963 Loss              | Grade2-2 | Partial  |
| chr1:11,606,557-11,836,963 Loss              | Grade2-3 | Partial  |
| chr1:11,606,557-11,836,963 Loss              | Grade2-4 | Partial  |
| chr1:12,164,074-13,830,696 Loss              | Grade1   | Absent   |
| chr1:12,164,074-13,830,696 Loss              | Grade2-1 | Partial  |
| chr1:12,164,074-13,830,696 Loss              | Grade2-2 | Partial  |
| chr1:12,164,074-13,830,696 Loss              | Grade2-3 | Partial  |
| chr1:12,164,074-13,830,696 Loss              | Grade2-4 | Partial  |
| chr1:13,874,932-18,435,797 Allelic Imbalance | Grade1   | Absent   |
| chr1:13,874,932-18,435,797 Allelic Imbalance | Grade2-1 | Partial  |
| chr1:13,874,932-18,435,797 Allelic Imbalance | Grade2-2 | Partial  |
| chr1:13,874,932-18,435,797 Allelic Imbalance | Grade2-3 | Partial  |
| chr1:13,874,932-18,435,797 Allelic Imbalance | Grade2-4 | Partial  |
| chr1:13,874,932-18,438,295 Loss              | Grade1   | Absent   |
| chr1:13,874,932-18,438,295 Loss              | Grade2-1 | Partial  |
| chr1:13,874,932-18,438,295 Loss              | Grade2-2 | Partial  |
| chr1:13,874,932-18,438,295 Loss              | Grade2-3 | Partial  |
| chr1:13,874,932-18,438,295 Loss              | Grade2-4 | Partial  |
| chr1:18,511,560-18,528,437 Loss              | Grade1   | Absent   |
| chr1:18,511,560-18,528,437 Loss              | Grade2-1 | Absent   |
| chr1:18,511,560-18,528,437 Loss              | Grade2-3 | Absent   |
| chr1:18,511,560-18,528,437 Loss              | Grade2-4 | Absent   |
| chr1:18,511,560-18,528,437 Loss              | Grade2-2 | Complete |
| chr1:18,583,459-20,882,863 Allelic Imbalance | Grade1   | Absent   |
| chr1:18,583,459-20,882,863 Allelic Imbalance | Grade2-1 | Absent   |
| chr1:18,583,459-20,882,863 Allelic Imbalance | Grade2-2 | Absent   |
| chr1:18,583,459-20,882,863 Allelic Imbalance | Grade2-3 | Absent   |
| chr1:18,583,459-20,882,863 Allelic Imbalance | Grade2-4 | Complete |
| chr1:18,583,459-26,612,467 Loss              | Grade1   | Absent   |
| chr1:18,583,459-26,612,467 Loss              | Grade2-1 | Partial  |
| chr1:18,583,459-26,612,467 Loss              | Grade2-2 | Partial  |
| chr1:18,583,459-26,612,467 Loss              | Grade2-3 | Partial  |
| chr1:18,583,459-26,612,467 Loss              | Grade2-4 | Partial  |
| chr1:20,924,563-26,612,467 Allelic Imbalance | Grade1   | Absent   |
| chr1:20,924,563-26,612,467 Allelic Imbalance | Grade2-2 | Absent   |
| chr1:20,924,563-26,612,467 Allelic Imbalance | Grade2-3 | Absent   |
| chr1:20,924,563-26,612,467 Allelic Imbalance | Grade2-4 | Complete |

|                                              |          |          |
|----------------------------------------------|----------|----------|
| chr1:20,924,563-26,612,467 Allelic Imbalance | Grade2-1 | Partial  |
| chr1:26,899,284-28,826,479 Loss              | Grade1   | Absent   |
| chr1:26,899,284-28,826,479 Loss              | Grade2-1 | Absent   |
| chr1:26,899,284-28,826,479 Loss              | Grade2-4 | Complete |
| chr1:26,899,284-28,826,479 Loss              | Grade2-2 | Partial  |
| chr1:26,899,284-28,826,479 Loss              | Grade2-3 | Partial  |
| chr1:29,743,519-31,258,543 Allelic Imbalance | Grade1   | Absent   |
| chr1:29,743,519-31,258,543 Allelic Imbalance | Grade2-4 | Complete |
| chr1:29,743,519-31,258,543 Allelic Imbalance | Grade2-1 | Partial  |
| chr1:29,743,519-31,258,543 Allelic Imbalance | Grade2-2 | Partial  |
| chr1:29,743,519-31,258,543 Allelic Imbalance | Grade2-3 | Partial  |
| chr1:29,743,519-31,258,543 Loss              | Grade1   | Absent   |
| chr1:29,743,519-31,258,543 Loss              | Grade2-4 | Complete |
| chr1:29,743,519-31,258,543 Loss              | Grade2-1 | Partial  |
| chr1:29,743,519-31,258,543 Loss              | Grade2-2 | Partial  |
| chr1:29,743,519-31,258,543 Loss              | Grade2-3 | Partial  |
| chr1:31,316,754-36,734,509 Loss              | Grade1   | Absent   |
| chr1:31,316,754-36,734,509 Loss              | Grade2-4 | Complete |
| chr1:31,316,754-36,734,509 Loss              | Grade2-1 | Partial  |
| chr1:31,316,754-36,734,509 Loss              | Grade2-2 | Partial  |
| chr1:31,316,754-36,734,509 Loss              | Grade2-3 | Partial  |
| chr1:36,939,814-39,427,875 Allelic Imbalance | Grade1   | Absent   |
| chr1:36,939,814-39,427,875 Allelic Imbalance | Grade2-2 | Absent   |
| chr1:36,939,814-39,427,875 Allelic Imbalance | Grade2-3 | Absent   |
| chr1:36,939,814-39,427,875 Allelic Imbalance | Grade2-4 | Absent   |
| chr1:36,939,814-39,427,875 Allelic Imbalance | Grade2-1 | Complete |
| chr1:36,939,814-41,087,251 Loss              | Grade1   | Absent   |
| chr1:36,939,814-41,087,251 Loss              | Grade2-1 | Partial  |
| chr1:36,939,814-41,087,251 Loss              | Grade2-2 | Partial  |
| chr1:36,939,814-41,087,251 Loss              | Grade2-3 | Partial  |
| chr1:36,939,814-41,087,251 Loss              | Grade2-4 | Partial  |
| chr1:46,739,615-54,375,459 Loss              | Grade1   | Absent   |
| chr1:46,739,615-54,375,459 Loss              | Grade2-4 | Complete |
| chr1:46,739,615-54,375,459 Loss              | Grade2-1 | Partial  |
| chr1:46,739,615-54,375,459 Loss              | Grade2-2 | Partial  |
| chr1:46,739,615-54,375,459 Loss              | Grade2-3 | Partial  |
| chr1:52,398,520-54,305,759 Allelic Imbalance | Grade1   | Absent   |
| chr1:52,398,520-54,305,759 Allelic Imbalance | Grade2-1 | Absent   |
| chr1:52,398,520-54,305,759 Allelic Imbalance | Grade2-2 | Absent   |
| chr1:52,398,520-54,305,759 Allelic Imbalance | Grade2-4 | Absent   |
| chr1:52,398,520-54,305,759 Allelic Imbalance | Grade2-3 | Complete |
| chr1:54,471,319-68,478,313 Allelic Imbalance | Grade1   | Absent   |
| chr1:54,471,319-68,478,313 Allelic Imbalance | Grade2-1 | Partial  |
| chr1:54,471,319-68,478,313 Allelic Imbalance | Grade2-2 | Partial  |
| chr1:54,471,319-68,478,313 Allelic Imbalance | Grade2-3 | Partial  |
| chr1:54,471,319-68,478,313 Allelic Imbalance | Grade2-4 | Partial  |
| chr1:54,471,319-68,499,957 Loss              | Grade1   | Absent   |

|                                              |          |          |
|----------------------------------------------|----------|----------|
| chr1:54,471,319-68,499,957 Loss              | Grade2-4 | Complete |
| chr1:54,471,319-68,499,957 Loss              | Grade2-1 | Partial  |
| chr1:54,471,319-68,499,957 Loss              | Grade2-2 | Partial  |
| chr1:54,471,319-68,499,957 Loss              | Grade2-3 | Partial  |
| chr1:68,475,798-71,023,273 Allelic Loss      | Grade1   | Absent   |
| chr1:68,475,798-71,023,273 Allelic Loss      | Grade2-1 | Complete |
| chr1:68,475,798-71,023,273 Allelic Loss      | Grade2-2 | Partial  |
| chr1:68,475,798-71,023,273 Allelic Loss      | Grade2-3 | Partial  |
| chr1:68,475,798-71,023,273 Allelic Loss      | Grade2-4 | Partial  |
| chr1:71,005,838-71,511,289 Loss              | Grade1   | Absent   |
| chr1:71,005,838-71,511,289 Loss              | Grade2-2 | Complete |
| chr1:71,005,838-71,511,289 Loss              | Grade2-3 | Complete |
| chr1:71,005,838-71,511,289 Loss              | Grade2-4 | Complete |
| chr1:71,005,838-71,511,289 Loss              | Grade2-1 | Partial  |
| chr1:71,684,307-72,019,324 Loss              | Grade1   | Absent   |
| chr1:71,684,307-72,019,324 Loss              | Grade2-1 | Complete |
| chr1:71,684,307-72,019,324 Loss              | Grade2-2 | Complete |
| chr1:71,684,307-72,019,324 Loss              | Grade2-3 | Complete |
| chr1:71,684,307-72,019,324 Loss              | Grade2-4 | Partial  |
| chr1:76,113,826-76,336,750 Loss              | Grade1   | Absent   |
| chr1:76,113,826-76,336,750 Loss              | Grade2-1 | Complete |
| chr1:76,113,826-76,336,750 Loss              | Grade2-2 | Complete |
| chr1:76,113,826-76,336,750 Loss              | Grade2-3 | Complete |
| chr1:76,113,826-76,336,750 Loss              | Grade2-4 | Complete |
| chr1:78,719,046-86,495,830 Allelic Imbalance | Grade1   | Absent   |
| chr1:78,719,046-86,495,830 Allelic Imbalance | Grade2-2 | Complete |
| chr1:78,719,046-86,495,830 Allelic Imbalance | Grade2-1 | Partial  |
| chr1:78,719,046-86,495,830 Allelic Imbalance | Grade2-3 | Partial  |
| chr1:78,719,046-86,495,830 Allelic Imbalance | Grade2-4 | Partial  |
| chr1:78,719,046-86,495,830 Loss              | Grade1   | Absent   |
| chr1:78,719,046-86,495,830 Loss              | Grade2-2 | Complete |
| chr1:78,719,046-86,495,830 Loss              | Grade2-1 | Partial  |
| chr1:78,719,046-86,495,830 Loss              | Grade2-3 | Partial  |
| chr1:78,719,046-86,495,830 Loss              | Grade2-4 | Partial  |
| chr1:93,732,250-103,694,48 Allelic Imbalance | Grade1   | Absent   |
| chr1:93,732,250-103,694,48 Allelic Imbalance | Grade2-1 | Absent   |
| chr1:93,732,250-103,694,48 Allelic Imbalance | Grade2-3 | Absent   |
| chr1:93,732,250-103,694,48 Allelic Imbalance | Grade2-4 | Absent   |
| chr1:93,732,250-103,694,48 Allelic Imbalance | Grade2-2 | Complete |
| chr1:93,732,250-103,694,48 Loss              | Grade1   | Absent   |
| chr1:93,732,250-103,694,48 Loss              | Grade2-2 | Complete |
| chr1:93,732,250-103,694,48 Loss              | Grade2-1 | Partial  |
| chr1:93,732,250-103,694,48 Loss              | Grade2-3 | Partial  |
| chr1:93,732,250-103,694,48 Loss              | Grade2-4 | Partial  |
| chr1:103,763,946-115,397,9 Allelic Imbalance | Grade1   | Absent   |
| chr1:103,763,946-115,397,9 Allelic Imbalance | Grade2-4 | Complete |
| chr1:103,763,946-115,397,9 Allelic Imbalance | Grade2-1 | Partial  |

|                                              |          |          |
|----------------------------------------------|----------|----------|
| chr1:103,763,946-115,397,9 Allelic Imbalance | Grade2-2 | Partial  |
| chr1:103,763,946-115,397,9 Allelic Imbalance | Grade2-3 | Partial  |
| chr1:103,763,946-115,401,9 Loss              | Grade1   | Absent   |
| chr1:103,763,946-115,401,9 Loss              | Grade2-1 | Partial  |
| chr1:103,763,946-115,401,9 Loss              | Grade2-2 | Partial  |
| chr1:103,763,946-115,401,9 Loss              | Grade2-3 | Partial  |
| chr1:103,763,946-115,401,9 Loss              | Grade2-4 | Partial  |
| chr1:149,756,665-152,217,8 Allelic Imbalance | Grade1   | Absent   |
| chr1:149,756,665-152,217,8 Allelic Imbalance | Grade2-2 | Complete |
| chr1:149,756,665-152,217,8 Allelic Imbalance | Grade2-1 | Partial  |
| chr1:149,756,665-152,217,8 Allelic Imbalance | Grade2-3 | Partial  |
| chr1:149,756,665-152,217,8 Allelic Imbalance | Grade2-4 | Partial  |
| chr1:149,756,665-152,217,8 Gain              | Grade1   | Absent   |
| chr1:149,756,665-152,217,8 Gain              | Grade2-2 | Complete |
| chr1:149,756,665-152,217,8 Gain              | Grade2-1 | Partial  |
| chr1:149,756,665-152,217,8 Gain              | Grade2-3 | Partial  |
| chr1:149,756,665-152,217,8 Gain              | Grade2-4 | Partial  |
| chr1:153,693,339-155,203,1 Allelic Imbalance | Grade1   | Absent   |
| chr1:153,693,339-155,203,1 Allelic Imbalance | Grade2-2 | Complete |
| chr1:153,693,339-155,203,1 Allelic Imbalance | Grade2-1 | Partial  |
| chr1:153,693,339-155,203,1 Allelic Imbalance | Grade2-3 | Partial  |
| chr1:153,693,339-155,203,1 Allelic Imbalance | Grade2-4 | Partial  |
| chr1:153,693,339-155,203,1 Gain              | Grade1   | Absent   |
| chr1:153,693,339-155,203,1 Gain              | Grade2-2 | Complete |
| chr1:153,693,339-155,203,1 Gain              | Grade2-1 | Partial  |
| chr1:153,693,339-155,203,1 Gain              | Grade2-3 | Partial  |
| chr1:153,693,339-155,203,1 Gain              | Grade2-4 | Partial  |
| chr1:155,209,741-157,960,2 Gain              | Grade1   | Absent   |
| chr1:155,209,741-157,960,2 Gain              | Grade2-2 | Complete |
| chr1:155,209,741-157,960,2 Gain              | Grade2-1 | Partial  |
| chr1:155,209,741-157,960,2 Gain              | Grade2-3 | Partial  |
| chr1:155,209,741-157,960,2 Gain              | Grade2-4 | Partial  |
| chr1:155,209,741-158,735,7 Allelic Imbalance | Grade1   | Absent   |
| chr1:155,209,741-158,735,7 Allelic Imbalance | Grade2-1 | Partial  |
| chr1:155,209,741-158,735,7 Allelic Imbalance | Grade2-2 | Partial  |
| chr1:155,209,741-158,735,7 Allelic Imbalance | Grade2-3 | Partial  |
| chr1:155,209,741-158,735,7 Allelic Imbalance | Grade2-4 | Partial  |
| chr1:158,086,703-158,735,7 Gain              | Grade1   | Absent   |
| chr1:158,086,703-158,735,7 Gain              | Grade2-1 | Partial  |
| chr1:158,086,703-158,735,7 Gain              | Grade2-2 | Partial  |
| chr1:158,086,703-158,735,7 Gain              | Grade2-3 | Partial  |
| chr1:158,086,703-158,735,7 Gain              | Grade2-4 | Partial  |
| chr1:158,747,432-164,879,3 Allelic Imbalance | Grade1   | Absent   |
| chr1:158,747,432-164,879,3 Allelic Imbalance | Grade2-2 | Complete |
| chr1:158,747,432-164,879,3 Allelic Imbalance | Grade2-1 | Partial  |
| chr1:158,747,432-164,879,3 Allelic Imbalance | Grade2-3 | Partial  |
| chr1:158,747,432-164,879,3 Allelic Imbalance | Grade2-4 | Partial  |

|                                              |          |          |
|----------------------------------------------|----------|----------|
| chr1:158,747,432-164,879,3 Gain              | Grade1   | Absent   |
| chr1:158,747,432-164,879,3 Gain              | Grade2-2 | Complete |
| chr1:158,747,432-164,879,3 Gain              | Grade2-1 | Partial  |
| chr1:158,747,432-164,879,3 Gain              | Grade2-3 | Partial  |
| chr1:158,747,432-164,879,3 Gain              | Grade2-4 | Partial  |
| chr1:165,034,548-165,341,3 Gain              | Grade1   | Absent   |
| chr1:165,034,548-165,341,3 Gain              | Grade2-2 | Complete |
| chr1:165,034,548-165,341,3 Gain              | Grade2-1 | Partial  |
| chr1:165,034,548-165,341,3 Gain              | Grade2-3 | Partial  |
| chr1:165,034,548-165,341,3 Gain              | Grade2-4 | Partial  |
| chr1:165,034,548-165,778,5 Allelic Imbalance | Grade1   | Absent   |
| chr1:165,034,548-165,778,5 Allelic Imbalance | Grade2-1 | Complete |
| chr1:165,034,548-165,778,5 Allelic Imbalance | Grade2-3 | Complete |
| chr1:165,034,548-165,778,5 Allelic Imbalance | Grade2-4 | Complete |
| chr1:165,034,548-165,778,5 Allelic Imbalance | Grade2-2 | Partial  |
| chr1:165,560,963-165,778,5 Gain              | Grade1   | Absent   |
| chr1:165,560,963-165,778,5 Gain              | Grade2-1 | Partial  |
| chr1:165,560,963-165,778,5 Gain              | Grade2-2 | Partial  |
| chr1:165,560,963-165,778,5 Gain              | Grade2-3 | Partial  |
| chr1:165,560,963-165,778,5 Gain              | Grade2-4 | Partial  |
| chr1:165,922,580-167,016,2 Gain              | Grade1   | Absent   |
| chr1:165,922,580-167,016,2 Gain              | Grade2-1 | Partial  |
| chr1:165,922,580-167,016,2 Gain              | Grade2-2 | Partial  |
| chr1:165,922,580-167,016,2 Gain              | Grade2-3 | Partial  |
| chr1:165,922,580-167,016,2 Gain              | Grade2-4 | Partial  |
| chr1:167,157,499-175,090,2 Gain              | Grade1   | Absent   |
| chr1:167,157,499-175,090,2 Gain              | Grade2-1 | Partial  |
| chr1:167,157,499-175,090,2 Gain              | Grade2-2 | Partial  |
| chr1:167,157,499-175,090,2 Gain              | Grade2-3 | Partial  |
| chr1:167,157,499-175,090,2 Gain              | Grade2-4 | Partial  |
| chr1:175,855,987-177,706,7 Gain              | Grade1   | Absent   |
| chr1:175,855,987-177,706,7 Gain              | Grade2-4 | Complete |
| chr1:175,855,987-177,706,7 Gain              | Grade2-1 | Partial  |
| chr1:175,855,987-177,706,7 Gain              | Grade2-2 | Partial  |
| chr1:175,855,987-177,706,7 Gain              | Grade2-3 | Partial  |
| chr1:177,813,426-180,097,1 Gain              | Grade1   | Absent   |
| chr1:177,813,426-180,097,1 Gain              | Grade2-1 | Partial  |
| chr1:177,813,426-180,097,1 Gain              | Grade2-2 | Partial  |
| chr1:177,813,426-180,097,1 Gain              | Grade2-3 | Partial  |
| chr1:177,813,426-180,097,1 Gain              | Grade2-4 | Partial  |
| chr1:180,167,839-180,901,4 Gain              | Grade1   | Absent   |
| chr1:180,167,839-180,901,4 Gain              | Grade2-4 | Complete |
| chr1:180,167,839-180,901,4 Gain              | Grade2-1 | Partial  |
| chr1:180,167,839-180,901,4 Gain              | Grade2-2 | Partial  |
| chr1:180,167,839-180,901,4 Gain              | Grade2-3 | Partial  |
| chr1:181,111,459-181,405,3 Gain              | Grade1   | Absent   |
| chr1:181,111,459-181,405,3 Gain              | Grade2-1 | Absent   |

|                                              |          |          |
|----------------------------------------------|----------|----------|
| chr1:181,111,459-181,405,3 Gain              | Grade2-2 | Partial  |
| chr1:181,111,459-181,405,3 Gain              | Grade2-3 | Partial  |
| chr1:181,111,459-181,405,3 Gain              | Grade2-4 | Partial  |
| chr1:181,481,984-181,712,3 Gain              | Grade1   | Absent   |
| chr1:181,481,984-181,712,3 Gain              | Grade2-1 | Partial  |
| chr1:181,481,984-181,712,3 Gain              | Grade2-2 | Partial  |
| chr1:181,481,984-181,712,3 Gain              | Grade2-3 | Partial  |
| chr1:181,481,984-181,712,3 Gain              | Grade2-4 | Partial  |
| chr1:181,842,663-204,999,5 Gain              | Grade1   | Absent   |
| chr1:181,842,663-204,999,5 Gain              | Grade2-1 | Partial  |
| chr1:181,842,663-204,999,5 Gain              | Grade2-2 | Partial  |
| chr1:181,842,663-204,999,5 Gain              | Grade2-3 | Partial  |
| chr1:181,842,663-204,999,5 Gain              | Grade2-4 | Partial  |
| chr1:165,922,580-226,032,6 Allelic Imbalance | Grade1   | Absent   |
| chr1:165,922,580-226,032,6 Allelic Imbalance | Grade2-1 | Partial  |
| chr1:165,922,580-226,032,6 Allelic Imbalance | Grade2-2 | Partial  |
| chr1:165,922,580-226,032,6 Allelic Imbalance | Grade2-3 | Partial  |
| chr1:165,922,580-226,032,6 Allelic Imbalance | Grade2-4 | Partial  |
| chr1:205,053,666-205,763,5 Gain              | Grade1   | Absent   |
| chr1:205,053,666-205,763,5 Gain              | Grade2-1 | Complete |
| chr1:205,053,666-205,763,5 Gain              | Grade2-3 | Complete |
| chr1:205,053,666-205,763,5 Gain              | Grade2-2 | Partial  |
| chr1:205,053,666-205,763,5 Gain              | Grade2-4 | Partial  |
| chr1:205,898,895-206,233,0 Gain              | Grade1   | Absent   |
| chr1:205,898,895-206,233,0 Gain              | Grade2-1 | Absent   |
| chr1:205,898,895-206,233,0 Gain              | Grade2-3 | Absent   |
| chr1:205,898,895-206,233,0 Gain              | Grade2-2 | Complete |
| chr1:205,898,895-206,233,0 Gain              | Grade2-4 | Partial  |
| chr1:206,616,227-207,038,0 Gain              | Grade1   | Absent   |
| chr1:206,616,227-207,038,0 Gain              | Grade2-3 | Absent   |
| chr1:206,616,227-207,038,0 Gain              | Grade2-4 | Complete |
| chr1:206,616,227-207,038,0 Gain              | Grade2-1 | Partial  |
| chr1:206,616,227-207,038,0 Gain              | Grade2-2 | Partial  |
| chr1:207,195,651-210,724,6 Gain              | Grade1   | Absent   |
| chr1:207,195,651-210,724,6 Gain              | Grade2-1 | Partial  |
| chr1:207,195,651-210,724,6 Gain              | Grade2-2 | Partial  |
| chr1:207,195,651-210,724,6 Gain              | Grade2-3 | Partial  |
| chr1:207,195,651-210,724,6 Gain              | Grade2-4 | Partial  |
| chr1:210,785,771-213,488,1 Gain              | Grade1   | Absent   |
| chr1:210,785,771-213,488,1 Gain              | Grade2-1 | Partial  |
| chr1:210,785,771-213,488,1 Gain              | Grade2-2 | Partial  |
| chr1:210,785,771-213,488,1 Gain              | Grade2-3 | Partial  |
| chr1:210,785,771-213,488,1 Gain              | Grade2-4 | Partial  |
| chr1:213,627,727-213,941,9 Gain              | Grade1   | Absent   |
| chr1:213,627,727-213,941,9 Gain              | Grade2-4 | Complete |
| chr1:213,627,727-213,941,9 Gain              | Grade2-1 | Partial  |
| chr1:213,627,727-213,941,9 Gain              | Grade2-2 | Partial  |

|                                              |          |          |
|----------------------------------------------|----------|----------|
| chr1:213,627,727-213,941,9 Gain              | Grade2-3 | Partial  |
| chr1:214,084,263-220,868,2 Gain              | Grade1   | Absent   |
| chr1:214,084,263-220,868,2 Gain              | Grade2-4 | Complete |
| chr1:214,084,263-220,868,2 Gain              | Grade2-1 | Partial  |
| chr1:214,084,263-220,868,2 Gain              | Grade2-2 | Partial  |
| chr1:214,084,263-220,868,2 Gain              | Grade2-3 | Partial  |
| chr1:221,236,220-224,863,8 Gain              | Grade1   | Absent   |
| chr1:221,236,220-224,863,8 Gain              | Grade2-1 | Partial  |
| chr1:221,236,220-224,863,8 Gain              | Grade2-2 | Partial  |
| chr1:221,236,220-224,863,8 Gain              | Grade2-3 | Partial  |
| chr1:221,236,220-224,863,8 Gain              | Grade2-4 | Partial  |
| chr1:224,914,179-226,032,6 Gain              | Grade1   | Absent   |
| chr1:224,914,179-226,032,6 Gain              | Grade2-1 | Partial  |
| chr1:224,914,179-226,032,6 Gain              | Grade2-2 | Partial  |
| chr1:224,914,179-226,032,6 Gain              | Grade2-3 | Partial  |
| chr1:224,914,179-226,032,6 Gain              | Grade2-4 | Partial  |
| chr1:226,073,063-227,336,9 Allelic Imbalance | Grade1   | Absent   |
| chr1:226,073,063-227,336,9 Allelic Imbalance | Grade2-4 | Complete |
| chr1:226,073,063-227,336,9 Allelic Imbalance | Grade2-1 | Partial  |
| chr1:226,073,063-227,336,9 Allelic Imbalance | Grade2-2 | Partial  |
| chr1:226,073,063-227,336,9 Allelic Imbalance | Grade2-3 | Partial  |
| chr1:226,073,063-227,336,9 Gain              | Grade1   | Absent   |
| chr1:226,073,063-227,336,9 Gain              | Grade2-4 | Complete |
| chr1:226,073,063-227,336,9 Gain              | Grade2-1 | Partial  |
| chr1:226,073,063-227,336,9 Gain              | Grade2-2 | Partial  |
| chr1:226,073,063-227,336,9 Gain              | Grade2-3 | Partial  |
| chr2:25,286,655-27,427,390 Loss              | Grade1   | Absent   |
| chr2:25,286,655-27,427,390 Loss              | Grade2-1 | Partial  |
| chr2:25,286,655-27,427,390 Loss              | Grade2-2 | Partial  |
| chr2:25,286,655-27,427,390 Loss              | Grade2-3 | Partial  |
| chr2:25,286,655-27,427,390 Loss              | Grade2-4 | Partial  |
| chr2:141,344,553-141,948,8 Loss              | Grade1   | Absent   |
| chr2:141,344,553-141,948,8 Loss              | Grade2-3 | Complete |
| chr2:141,344,553-141,948,8 Loss              | Grade2-4 | Complete |
| chr2:141,344,553-141,948,8 Loss              | Grade2-1 | Partial  |
| chr2:141,344,553-141,948,8 Loss              | Grade2-2 | Partial  |
| chr2:142,066,896-142,114,0 Loss              | Grade1   | Absent   |
| chr2:142,066,896-142,114,0 Loss              | Grade2-1 | Absent   |
| chr2:142,066,896-142,114,0 Loss              | Grade2-3 | Absent   |
| chr2:142,066,896-142,114,0 Loss              | Grade2-4 | Complete |
| chr2:142,066,896-142,114,0 Loss              | Grade2-2 | Partial  |
| chr3:60,533,831-60,552,706 Loss              | Grade1   | Absent   |
| chr3:60,533,831-60,552,706 Loss              | Grade2-1 | Absent   |
| chr3:60,533,831-60,552,706 Loss              | Grade2-3 | Absent   |
| chr3:60,533,831-60,552,706 Loss              | Grade2-2 | Complete |
| chr3:60,533,831-60,552,706 Loss              | Grade2-4 | Partial  |
| chr3:60,729,820-60,775,714 Gain              | Grade1   | Absent   |



|                                              |          |          |
|----------------------------------------------|----------|----------|
| chr3:60,729,820-60,775,714 Gain              | Grade2-2 | Absent   |
| chr3:60,729,820-60,775,714 Gain              | Grade2-1 | Partial  |
| chr3:60,729,820-60,775,714 Gain              | Grade2-3 | Partial  |
| chr3:60,729,820-60,775,714 Gain              | Grade2-4 | Partial  |
| chr3:174,219,266-174,359,1 Loss              | Grade1   | Absent   |
| chr3:174,219,266-174,359,1 Loss              | Grade2-4 | Complete |
| chr3:174,219,266-174,359,1 Loss              | Grade2-1 | Partial  |
| chr3:174,219,266-174,359,1 Loss              | Grade2-2 | Partial  |
| chr3:174,219,266-174,359,1 Loss              | Grade2-3 | Partial  |
| chr6:63,926,951-64,934,998 Loss              | Grade1   | Absent   |
| chr6:63,926,951-64,934,998 Loss              | Grade2-1 | Complete |
| chr6:63,926,951-64,934,998 Loss              | Grade2-2 | Complete |
| chr6:63,926,951-64,934,998 Loss              | Grade2-3 | Complete |
| chr6:63,926,951-64,934,998 Loss              | Grade2-4 | Complete |
| chr6:70,142,826-134,466,51 Loss              | Grade1   | Absent   |
| chr6:70,142,826-134,466,51 Loss              | Grade2-2 | Complete |
| chr6:70,142,826-134,466,51 Loss              | Grade2-1 | Partial  |
| chr6:70,142,826-134,466,51 Loss              | Grade2-3 | Partial  |
| chr6:70,142,826-134,466,51 Loss              | Grade2-4 | Partial  |
| chr6:134,521,112-167,155,0 Loss              | Grade1   | Absent   |
| chr6:134,521,112-167,155,0 Loss              | Grade2-1 | Partial  |
| chr6:134,521,112-167,155,0 Loss              | Grade2-2 | Partial  |
| chr6:134,521,112-167,155,0 Loss              | Grade2-3 | Partial  |
| chr6:134,521,112-167,155,0 Loss              | Grade2-4 | Partial  |
| chr6:151,674,459-157,877,9 Allelic Imbalance | Grade1   | Absent   |
| chr6:151,674,459-157,877,9 Allelic Imbalance | Grade2-2 | Absent   |
| chr6:151,674,459-157,877,9 Allelic Imbalance | Grade2-4 | Absent   |
| chr6:151,674,459-157,877,9 Allelic Imbalance | Grade2-3 | Complete |
| chr6:151,674,459-157,877,9 Allelic Imbalance | Grade2-1 | Partial  |
| chr6:158,102,055-167,155,0 Allelic Imbalance | Grade1   | Absent   |
| chr6:158,102,055-167,155,0 Allelic Imbalance | Grade2-2 | Complete |
| chr6:158,102,055-167,155,0 Allelic Imbalance | Grade2-1 | Partial  |
| chr6:158,102,055-167,155,0 Allelic Imbalance | Grade2-3 | Partial  |
| chr6:158,102,055-167,155,0 Allelic Imbalance | Grade2-4 | Partial  |
| chr6:167,190,221-170,445,4 Loss              | Grade1   | Absent   |
| chr6:167,190,221-170,445,4 Loss              | Grade2-1 | Partial  |
| chr6:167,190,221-170,445,4 Loss              | Grade2-2 | Partial  |
| chr6:167,190,221-170,445,4 Loss              | Grade2-3 | Partial  |
| chr6:167,190,221-170,445,4 Loss              | Grade2-4 | Partial  |
| chr6:167,197,802-170,445,4 Allelic Imbalance | Grade1   | Absent   |
| chr6:167,197,802-170,445,4 Allelic Imbalance | Grade2-1 | Partial  |
| chr6:167,197,802-170,445,4 Allelic Imbalance | Grade2-2 | Partial  |
| chr6:167,197,802-170,445,4 Allelic Imbalance | Grade2-3 | Partial  |
| chr6:167,197,802-170,445,4 Allelic Imbalance | Grade2-4 | Partial  |
| chr6:170,499,358-171,115,0 Loss              | Grade1   | Absent   |
| chr6:170,499,358-171,115,0 Loss              | Grade2-3 | Complete |
| chr6:170,499,358-171,115,0 Loss              | Grade2-1 | Partial  |

|                            |                   |          |          |
|----------------------------|-------------------|----------|----------|
| chr6:170,499,358-171,115,0 | Loss              | Grade2-2 | Partial  |
| chr6:170,499,358-171,115,0 | Loss              | Grade2-4 | Partial  |
| chr7:38,294,904-38,384,590 | Gain              | Grade2-4 | Complete |
| chr7:38,294,904-38,384,590 | Gain              | Grade1   | Partial  |
| chr7:38,294,904-38,384,590 | Gain              | Grade2-1 | Partial  |
| chr7:38,294,904-38,384,590 | Gain              | Grade2-2 | Partial  |
| chr7:38,294,904-38,384,590 | Gain              | Grade2-3 | Partial  |
| chr7:61,074,194-62,368,143 | Gain              | Grade1   | Absent   |
| chr7:61,074,194-62,368,143 | Gain              | Grade2-4 | Complete |
| chr7:61,074,194-62,368,143 | Gain              | Grade2-1 | Partial  |
| chr7:61,074,194-62,368,143 | Gain              | Grade2-2 | Partial  |
| chr7:61,074,194-62,368,143 | Gain              | Grade2-3 | Partial  |
| chr8:3,679,475-3,701,441   | Loss              | Grade2-1 | Absent   |
| chr8:3,679,475-3,701,441   | Loss              | Grade2-2 | Absent   |
| chr8:3,679,475-3,701,441   | Loss              | Grade2-3 | Absent   |
| chr8:3,679,475-3,701,441   | Loss              | Grade2-4 | Absent   |
| chr8:3,679,475-3,701,441   | Loss              | Grade1   | Complete |
| chr11:326,567-939,530      | Loss              | Grade1   | Absent   |
| chr11:326,567-939,530      | Loss              | Grade2-1 | Partial  |
| chr11:326,567-939,530      | Loss              | Grade2-2 | Partial  |
| chr11:326,567-939,530      | Loss              | Grade2-3 | Partial  |
| chr11:326,567-939,530      | Loss              | Grade2-4 | Partial  |
| chr11:1,033,174-1,254,645  | Loss              | Grade1   | Absent   |
| chr11:1,033,174-1,254,645  | Loss              | Grade2-1 | Absent   |
| chr11:1,033,174-1,254,645  | Loss              | Grade2-2 | Absent   |
| chr11:1,033,174-1,254,645  | Loss              | Grade2-3 | Absent   |
| chr11:1,033,174-1,254,645  | Loss              | Grade2-4 | Complete |
| chr11:1,413,671-1,644,910  | Loss              | Grade1   | Absent   |
| chr11:1,413,671-1,644,910  | Loss              | Grade2-1 | Complete |
| chr11:1,413,671-1,644,910  | Loss              | Grade2-2 | Complete |
| chr11:1,413,671-1,644,910  | Loss              | Grade2-3 | Complete |
| chr11:1,413,671-1,644,910  | Loss              | Grade2-4 | Complete |
| chr11:1,699,159-3,033,703  | Allelic Imbalance | Grade1   | Absent   |
| chr11:1,699,159-3,033,703  | Allelic Imbalance | Grade2-4 | Complete |
| chr11:1,699,159-3,033,703  | Allelic Imbalance | Grade2-1 | Partial  |
| chr11:1,699,159-3,033,703  | Allelic Imbalance | Grade2-2 | Partial  |
| chr11:1,699,159-3,033,703  | Allelic Imbalance | Grade2-3 | Partial  |
| chr11:1,699,159-3,033,703  | Loss              | Grade1   | Absent   |
| chr11:1,699,159-3,033,703  | Loss              | Grade2-4 | Complete |
| chr11:1,699,159-3,033,703  | Loss              | Grade2-1 | Partial  |
| chr11:1,699,159-3,033,703  | Loss              | Grade2-2 | Partial  |
| chr11:1,699,159-3,033,703  | Loss              | Grade2-3 | Partial  |
| chr11:3,116,008-9,536,682  | Loss              | Grade1   | Absent   |
| chr11:3,116,008-9,536,682  | Loss              | Grade2-1 | Partial  |
| chr11:3,116,008-9,536,682  | Loss              | Grade2-2 | Partial  |
| chr11:3,116,008-9,536,682  | Loss              | Grade2-3 | Partial  |
| chr11:3,116,008-9,536,682  | Loss              | Grade2-4 | Partial  |

|                            |                   |          |          |
|----------------------------|-------------------|----------|----------|
| chr11:3,116,352-9,536,682  | Allelic Imbalance | Grade1   | Absent   |
| chr11:3,116,352-9,536,682  | Allelic Imbalance | Grade2-4 | Complete |
| chr11:3,116,352-9,536,682  | Allelic Imbalance | Grade2-1 | Partial  |
| chr11:3,116,352-9,536,682  | Allelic Imbalance | Grade2-2 | Partial  |
| chr11:3,116,352-9,536,682  | Allelic Imbalance | Grade2-3 | Partial  |
| chr12:0-6,132,603          | Loss              | Grade1   | Absent   |
| chr12:0-6,132,603          | Loss              | Grade2-1 | Partial  |
| chr12:0-6,132,603          | Loss              | Grade2-2 | Partial  |
| chr12:0-6,132,603          | Loss              | Grade2-3 | Partial  |
| chr12:0-6,132,603          | Loss              | Grade2-4 | Partial  |
| chr12:373,761-32,583,652   | Allelic Imbalance | Grade1   | Absent   |
| chr12:373,761-32,583,652   | Allelic Imbalance | Grade2-1 | Partial  |
| chr12:373,761-32,583,652   | Allelic Imbalance | Grade2-2 | Partial  |
| chr12:373,761-32,583,652   | Allelic Imbalance | Grade2-3 | Partial  |
| chr12:373,761-32,583,652   | Allelic Imbalance | Grade2-4 | Partial  |
| chr12:7,054,129-32,583,652 | Loss              | Grade1   | Absent   |
| chr12:7,054,129-32,583,652 | Loss              | Grade2-1 | Partial  |
| chr12:7,054,129-32,583,652 | Loss              | Grade2-2 | Partial  |
| chr12:7,054,129-32,583,652 | Loss              | Grade2-3 | Partial  |
| chr12:7,054,129-32,583,652 | Loss              | Grade2-4 | Partial  |
| chr12:37,876,400-38,211,89 | Gain              | Grade1   | Absent   |
| chr12:37,876,400-38,211,89 | Gain              | Grade2-1 | Absent   |
| chr12:37,876,400-38,211,89 | Gain              | Grade2-2 | Absent   |
| chr12:37,876,400-38,211,89 | Gain              | Grade2-4 | Absent   |
| chr12:37,876,400-38,211,89 | Gain              | Grade2-3 | Complete |
| chr14:22,499,539-22,968,45 | Gain              | Grade1   | Complete |
| chr14:22,499,539-22,968,45 | Gain              | Grade2-1 | Complete |
| chr14:22,499,539-22,968,45 | Gain              | Grade2-2 | Complete |
| chr14:22,499,539-22,968,45 | Gain              | Grade2-4 | Complete |
| chr14:22,499,539-22,968,45 | Gain              | Grade2-3 | Partial  |
| chr14:82,307,322-82,497,14 | Loss              | Grade1   | Absent   |
| chr14:82,307,322-82,497,14 | Loss              | Grade2-2 | Complete |
| chr14:82,307,322-82,497,14 | Loss              | Grade2-1 | Partial  |
| chr14:82,307,322-82,497,14 | Loss              | Grade2-3 | Partial  |
| chr14:82,307,322-82,497,14 | Loss              | Grade2-4 | Partial  |
| chr18:76,945,094-77,138,05 | Loss              | Grade1   | Absent   |
| chr18:76,945,094-77,138,05 | Loss              | Grade2-1 | Partial  |
| chr18:76,945,094-77,138,05 | Loss              | Grade2-2 | Partial  |
| chr18:76,945,094-77,138,05 | Loss              | Grade2-3 | Partial  |
| chr18:76,945,094-77,138,05 | Loss              | Grade2-4 | Partial  |
| chr18:77,805,777-78,077,24 | Loss              | Grade1   | Absent   |
| chr18:77,805,777-78,077,24 | Loss              | Grade2-2 | Complete |
| chr18:77,805,777-78,077,24 | Loss              | Grade2-4 | Complete |
| chr18:77,805,777-78,077,24 | Loss              | Grade2-1 | Partial  |
| chr18:77,805,777-78,077,24 | Loss              | Grade2-3 | Partial  |
| chr22:16,197,021-17,437,07 | Loss              | Grade2-1 | Absent   |
| chr22:16,197,021-17,437,07 | Loss              | Grade2-2 | Absent   |

|                                              |          |          |
|----------------------------------------------|----------|----------|
| chr22:16,197,021-17,437,07 Loss              | Grade2-3 | Absent   |
| chr22:16,197,021-17,437,07 Loss              | Grade2-4 | Absent   |
| chr22:16,197,021-17,437,07 Loss              | Grade1   | Complete |
| chr22:17,437,078-19,426,86 Allelic Imbalance | Grade2-1 | Absent   |
| chr22:17,437,078-19,426,86 Allelic Imbalance | Grade2-2 | Absent   |
| chr22:17,437,078-19,426,86 Allelic Imbalance | Grade2-3 | Absent   |
| chr22:17,437,078-19,426,86 Allelic Imbalance | Grade2-4 | Absent   |
| chr22:17,437,078-19,426,86 Allelic Imbalance | Grade1   | Complete |
| chr22:19,426,861-19,585,25 Loss              | Grade2-1 | Absent   |
| chr22:19,426,861-19,585,25 Loss              | Grade2-2 | Absent   |
| chr22:19,426,861-19,585,25 Loss              | Grade2-3 | Absent   |
| chr22:19,426,861-19,585,25 Loss              | Grade2-4 | Absent   |
| chr22:19,426,861-19,585,25 Loss              | Grade1   | Complete |
| chr22:19,585,254-19,870,48 Allelic Imbalance | Grade2-1 | Absent   |
| chr22:19,585,254-19,870,48 Allelic Imbalance | Grade2-2 | Absent   |
| chr22:19,585,254-19,870,48 Allelic Imbalance | Grade2-3 | Absent   |
| chr22:19,585,254-19,870,48 Allelic Imbalance | Grade2-4 | Absent   |
| chr22:19,585,254-19,870,48 Allelic Imbalance | Grade1   | Complete |
| chr22:19,870,489-19,949,05 Loss              | Grade2-1 | Absent   |
| chr22:19,870,489-19,949,05 Loss              | Grade2-2 | Absent   |
| chr22:19,870,489-19,949,05 Loss              | Grade2-3 | Absent   |
| chr22:19,870,489-19,949,05 Loss              | Grade2-4 | Absent   |
| chr22:19,870,489-19,949,05 Loss              | Grade1   | Complete |
| chr22:19,974,324-20,009,90 Loss              | Grade2-1 | Absent   |
| chr22:19,974,324-20,009,90 Loss              | Grade2-2 | Absent   |
| chr22:19,974,324-20,009,90 Loss              | Grade2-3 | Absent   |
| chr22:19,974,324-20,009,90 Loss              | Grade2-4 | Absent   |
| chr22:19,974,324-20,009,90 Loss              | Grade1   | Complete |
| chr22:20,852,369-20,950,40 Loss              | Grade2-1 | Absent   |
| chr22:20,852,369-20,950,40 Loss              | Grade2-2 | Absent   |
| chr22:20,852,369-20,950,40 Loss              | Grade2-3 | Absent   |
| chr22:20,852,369-20,950,40 Loss              | Grade2-4 | Absent   |
| chr22:20,852,369-20,950,40 Loss              | Grade1   | Complete |
| chr22:21,421,264-21,975,12 Loss              | Grade2-1 | Absent   |
| chr22:21,421,264-21,975,12 Loss              | Grade2-2 | Absent   |
| chr22:21,421,264-21,975,12 Loss              | Grade2-3 | Absent   |
| chr22:21,421,264-21,975,12 Loss              | Grade2-4 | Absent   |
| chr22:21,421,264-21,975,12 Loss              | Grade1   | Complete |
| chr22:22,244,707-23,633,54 Allelic Imbalance | Grade2-1 | Absent   |
| chr22:22,244,707-23,633,54 Allelic Imbalance | Grade2-2 | Absent   |
| chr22:22,244,707-23,633,54 Allelic Imbalance | Grade2-3 | Absent   |
| chr22:22,244,707-23,633,54 Allelic Imbalance | Grade2-4 | Absent   |
| chr22:22,244,707-23,633,54 Allelic Imbalance | Grade1   | Complete |
| chr22:22,244,707-23,633,54 Loss              | Grade2-1 | Absent   |
| chr22:22,244,707-23,633,54 Loss              | Grade2-2 | Absent   |
| chr22:22,244,707-23,633,54 Loss              | Grade2-3 | Absent   |
| chr22:22,244,707-23,633,54 Loss              | Grade2-4 | Absent   |

|                                              |          |          |
|----------------------------------------------|----------|----------|
| chr22:22,244,707-23,633,54 Loss              | Grade1   | Complete |
| chr22:23,701,151-25,377,77 Loss              | Grade1   | Partial  |
| chr22:23,701,151-25,377,77 Loss              | Grade2-1 | Partial  |
| chr22:23,701,151-25,377,77 Loss              | Grade2-2 | Partial  |
| chr22:23,701,151-25,377,77 Loss              | Grade2-3 | Partial  |
| chr22:23,701,151-25,377,77 Loss              | Grade2-4 | Partial  |
| chr22:23,928,706-28,100,48 Allelic Imbalance | Grade2-1 | Absent   |
| chr22:23,928,706-28,100,48 Allelic Imbalance | Grade1   | Partial  |
| chr22:23,928,706-28,100,48 Allelic Imbalance | Grade2-2 | Partial  |
| chr22:23,928,706-28,100,48 Allelic Imbalance | Grade2-3 | Partial  |
| chr22:23,928,706-28,100,48 Allelic Imbalance | Grade2-4 | Partial  |
| chr22:25,585,854-28,100,48 Loss              | Grade1   | Partial  |
| chr22:25,585,854-28,100,48 Loss              | Grade2-1 | Partial  |
| chr22:25,585,854-28,100,48 Loss              | Grade2-2 | Partial  |
| chr22:25,585,854-28,100,48 Loss              | Grade2-3 | Partial  |
| chr22:25,585,854-28,100,48 Loss              | Grade2-4 | Partial  |
| chr22:28,129,263-29,690,56 Loss              | Grade1   | Partial  |
| chr22:28,129,263-29,690,56 Loss              | Grade2-1 | Partial  |
| chr22:28,129,263-29,690,56 Loss              | Grade2-2 | Partial  |
| chr22:28,129,263-29,690,56 Loss              | Grade2-3 | Partial  |
| chr22:28,129,263-29,690,56 Loss              | Grade2-4 | Partial  |
| chr22:29,790,127-30,689,33 Loss              | Grade1   | Partial  |
| chr22:29,790,127-30,689,33 Loss              | Grade2-1 | Partial  |
| chr22:29,790,127-30,689,33 Loss              | Grade2-2 | Partial  |
| chr22:29,790,127-30,689,33 Loss              | Grade2-3 | Partial  |
| chr22:29,790,127-30,689,33 Loss              | Grade2-4 | Partial  |
| chr22:30,163,739-30,957,12 Allelic Imbalance | Grade2-1 | Absent   |
| chr22:30,163,739-30,957,12 Allelic Imbalance | Grade2-2 | Absent   |
| chr22:30,163,739-30,957,12 Allelic Imbalance | Grade2-3 | Absent   |
| chr22:30,163,739-30,957,12 Allelic Imbalance | Grade2-4 | Absent   |
| chr22:30,163,739-30,957,12 Allelic Imbalance | Grade1   | Complete |
| chr22:30,763,296-32,011,22 Loss              | Grade2-4 | Complete |
| chr22:30,763,296-32,011,22 Loss              | Grade1   | Partial  |
| chr22:30,763,296-32,011,22 Loss              | Grade2-1 | Partial  |
| chr22:30,763,296-32,011,22 Loss              | Grade2-2 | Partial  |
| chr22:30,763,296-32,011,22 Loss              | Grade2-3 | Partial  |
| chr22:32,119,208-36,653,10 Loss              | Grade2-4 | Complete |
| chr22:32,119,208-36,653,10 Loss              | Grade1   | Partial  |
| chr22:32,119,208-36,653,10 Loss              | Grade2-1 | Partial  |
| chr22:32,119,208-36,653,10 Loss              | Grade2-2 | Partial  |
| chr22:32,119,208-36,653,10 Loss              | Grade2-3 | Partial  |
| chr22:31,770,014-40,029,00 Allelic Imbalance | Grade1   | Partial  |
| chr22:31,770,014-40,029,00 Allelic Imbalance | Grade2-1 | Partial  |
| chr22:31,770,014-40,029,00 Allelic Imbalance | Grade2-2 | Partial  |
| chr22:31,770,014-40,029,00 Allelic Imbalance | Grade2-3 | Partial  |
| chr22:31,770,014-40,029,00 Allelic Imbalance | Grade2-4 | Partial  |
| chr22:37,255,386-37,958,74 Loss              | Grade2-4 | Complete |

|                                              |          |          |
|----------------------------------------------|----------|----------|
| chr22:37,255,386-37,958,74 Loss              | Grade1   | Partial  |
| chr22:37,255,386-37,958,74 Loss              | Grade2-1 | Partial  |
| chr22:37,255,386-37,958,74 Loss              | Grade2-2 | Partial  |
| chr22:37,255,386-37,958,74 Loss              | Grade2-3 | Partial  |
| chr22:38,699,380-39,430,00 Loss              | Grade1   | Absent   |
| chr22:38,699,380-39,430,00 Loss              | Grade2-1 | Partial  |
| chr22:38,699,380-39,430,00 Loss              | Grade2-2 | Partial  |
| chr22:38,699,380-39,430,00 Loss              | Grade2-3 | Partial  |
| chr22:38,699,380-39,430,00 Loss              | Grade2-4 | Partial  |
| chr22:39,778,859-41,345,59 Loss              | Grade2-4 | Complete |
| chr22:39,778,859-41,345,59 Loss              | Grade1   | Partial  |
| chr22:39,778,859-41,345,59 Loss              | Grade2-1 | Partial  |
| chr22:39,778,859-41,345,59 Loss              | Grade2-2 | Partial  |
| chr22:39,778,859-41,345,59 Loss              | Grade2-3 | Partial  |
| chr22:40,931,121-42,689,98 Allelic Imbalance | Grade2-1 | Absent   |
| chr22:40,931,121-42,689,98 Allelic Imbalance | Grade2-2 | Absent   |
| chr22:40,931,121-42,689,98 Allelic Imbalance | Grade2-3 | Absent   |
| chr22:40,931,121-42,689,98 Allelic Imbalance | Grade2-4 | Absent   |
| chr22:40,931,121-42,689,98 Allelic Imbalance | Grade1   | Complete |
| chr22:41,792,686-43,459,82 Loss              | Grade1   | Partial  |
| chr22:41,792,686-43,459,82 Loss              | Grade2-1 | Partial  |
| chr22:41,792,686-43,459,82 Loss              | Grade2-2 | Partial  |
| chr22:41,792,686-43,459,82 Loss              | Grade2-3 | Partial  |
| chr22:41,792,686-43,459,82 Loss              | Grade2-4 | Partial  |
| chr22:42,819,631-44,270,19 Allelic Imbalance | Grade2-1 | Absent   |
| chr22:42,819,631-44,270,19 Allelic Imbalance | Grade2-2 | Absent   |
| chr22:42,819,631-44,270,19 Allelic Imbalance | Grade2-3 | Absent   |
| chr22:42,819,631-44,270,19 Allelic Imbalance | Grade2-4 | Absent   |
| chr22:42,819,631-44,270,19 Allelic Imbalance | Grade1   | Complete |
| chr22:43,768,475-44,340,06 Loss              | Grade2-4 | Complete |
| chr22:43,768,475-44,340,06 Loss              | Grade1   | Partial  |
| chr22:43,768,475-44,340,06 Loss              | Grade2-1 | Partial  |
| chr22:43,768,475-44,340,06 Loss              | Grade2-2 | Partial  |
| chr22:43,768,475-44,340,06 Loss              | Grade2-3 | Partial  |
| chr22:44,423,373-44,494,44 Loss              | Grade1   | Absent   |
| chr22:44,423,373-44,494,44 Loss              | Grade2-1 | Absent   |
| chr22:44,423,373-44,494,44 Loss              | Grade2-2 | Absent   |
| chr22:44,423,373-44,494,44 Loss              | Grade2-3 | Absent   |
| chr22:44,423,373-44,494,44 Loss              | Grade2-4 | Complete |
| chr22:44,525,653-44,576,39 Loss              | Grade1   | Absent   |
| chr22:44,525,653-44,576,39 Loss              | Grade2-4 | Absent   |
| chr22:44,525,653-44,576,39 Loss              | Grade2-2 | Complete |
| chr22:44,525,653-44,576,39 Loss              | Grade2-1 | Partial  |
| chr22:44,525,653-44,576,39 Loss              | Grade2-3 | Partial  |
| chr22:44,649,410-45,586,88 Loss              | Grade1   | Partial  |
| chr22:44,649,410-45,586,88 Loss              | Grade2-1 | Partial  |
| chr22:44,649,410-45,586,88 Loss              | Grade2-2 | Partial  |

|                                              |          |          |
|----------------------------------------------|----------|----------|
| chr22:44,649,410-45,586,88 Loss              | Grade2-3 | Partial  |
| chr22:44,649,410-45,586,88 Loss              | Grade2-4 | Partial  |
| chr22:44,324,176-46,044,68 Allelic Imbalance | Grade1   | Partial  |
| chr22:44,324,176-46,044,68 Allelic Imbalance | Grade2-1 | Partial  |
| chr22:44,324,176-46,044,68 Allelic Imbalance | Grade2-2 | Partial  |
| chr22:44,324,176-46,044,68 Allelic Imbalance | Grade2-3 | Partial  |
| chr22:44,324,176-46,044,68 Allelic Imbalance | Grade2-4 | Partial  |
| chr22:45,821,913-45,896,05 Loss              | Grade1   | Absent   |
| chr22:45,821,913-45,896,05 Loss              | Grade2-2 | Absent   |
| chr22:45,821,913-45,896,05 Loss              | Grade2-3 | Absent   |
| chr22:45,821,913-45,896,05 Loss              | Grade2-4 | Absent   |
| chr22:45,821,913-45,896,05 Loss              | Grade2-1 | Complete |
| chr22:45,985,993-46,269,99 Loss              | Grade1   | Partial  |
| chr22:45,985,993-46,269,99 Loss              | Grade2-1 | Partial  |
| chr22:45,985,993-46,269,99 Loss              | Grade2-2 | Partial  |
| chr22:45,985,993-46,269,99 Loss              | Grade2-3 | Partial  |
| chr22:45,985,993-46,269,99 Loss              | Grade2-4 | Partial  |
| chr22:46,355,329-46,908,39 Loss              | Grade1   | Partial  |
| chr22:46,355,329-46,908,39 Loss              | Grade2-1 | Partial  |
| chr22:46,355,329-46,908,39 Loss              | Grade2-2 | Partial  |
| chr22:46,355,329-46,908,39 Loss              | Grade2-3 | Partial  |
| chr22:46,355,329-46,908,39 Loss              | Grade2-4 | Partial  |
| chr22:46,989,960-47,116,36 Loss              | Grade1   | Absent   |
| chr22:46,989,960-47,116,36 Loss              | Grade2-1 | Absent   |
| chr22:46,989,960-47,116,36 Loss              | Grade2-4 | Absent   |
| chr22:46,989,960-47,116,36 Loss              | Grade2-2 | Complete |
| chr22:46,989,960-47,116,36 Loss              | Grade2-3 | Partial  |
| chr22:47,344,809-50,084,58 Loss              | Grade1   | Partial  |
| chr22:47,344,809-50,084,58 Loss              | Grade2-1 | Partial  |
| chr22:47,344,809-50,084,58 Loss              | Grade2-2 | Partial  |
| chr22:47,344,809-50,084,58 Loss              | Grade2-3 | Partial  |
| chr22:47,344,809-50,084,58 Loss              | Grade2-4 | Partial  |
| chr22:46,647,940-51,025,41 Allelic Imbalance | Grade1   | Partial  |
| chr22:46,647,940-51,025,41 Allelic Imbalance | Grade2-1 | Partial  |
| chr22:46,647,940-51,025,41 Allelic Imbalance | Grade2-2 | Partial  |
| chr22:46,647,940-51,025,41 Allelic Imbalance | Grade2-3 | Partial  |
| chr22:46,647,940-51,025,41 Allelic Imbalance | Grade2-4 | Partial  |
| chr22:50,982,436-51,065,07 Loss              | Grade2-2 | Absent   |
| chr22:50,982,436-51,065,07 Loss              | Grade2-3 | Absent   |
| chr22:50,982,436-51,065,07 Loss              | Grade2-4 | Complete |
| chr22:50,982,436-51,065,07 Loss              | Grade1   | Partial  |
| chr22:50,982,436-51,065,07 Loss              | Grade2-1 | Partial  |
| chr22:51,143,227-51,304,56 Loss              | Grade1   | Absent   |
| chr22:51,143,227-51,304,56 Loss              | Grade2-2 | Absent   |
| chr22:51,143,227-51,304,56 Loss              | Grade2-3 | Absent   |
| chr22:51,143,227-51,304,56 Loss              | Grade2-4 | Absent   |
| chr22:51,143,227-51,304,56 Loss              | Grade2-1 | Complete |

chrX:32,737,942-33,582,898 Loss  
chrX:32,737,942-33,582,898 Loss  
chrX:32,737,942-33,582,898 Loss  
chrX:32,737,942-33,582,898 Loss  
chrX:32,737,942-33,582,898 Loss

Grade1  
Grade2-1  
Grade2-3  
Grade2-2  
Grade2-4

Absent  
Complete  
Complete  
Partial  
Partial
