# Supplementary material for: First insight into the somatic mutation burden of neurofibromatosis type 2-associated grade I and grade II meningiomas: a case report comprehensive genomic study of two cranial meningiomas with vastly different clinical presentation
Source: PubMed Central journal article supplement (PMC5307647; doi:10.1186/s12885-017-3127-6), 2017-02-13
Supplement: 12885_2017_3127_MOESM3_ESM.pdf [file 12885_2017_3127_MOESM3_ESM.pdf]

**Additional File 3.** Genes, affected by gains and losses in the grade II meningioma.

| Gene Symbol  | Chromosome | Start    | End      | Length | Gene Name                                                                     |
|--------------|------------|----------|----------|--------|-------------------------------------------------------------------------------|
| PEX10        | chr1       | 2336240  | 2344010  | 7771   | peroxisomal biogenesis factor 10                                              |
| PLCH2        | chr1       | 2407753  | 2436969  | 29217  | phospholipase C, eta 2                                                        |
| ACTR2        | chr1       | 2938045  | 2939467  | 1423   | actin-related protein T2                                                      |
| FLJ42875     | chr1       | 2976180  | 2980350  | 4171   |                                                                               |
| LINC00982    | chr1       | 2976180  | 2984289  | 8110   | long intergenic non-protein coding RNA 982                                    |
| FLJ42875     | chr1       | 2980635  | 2984289  | 3655   |                                                                               |
| MIR4251      | chr1       | 3044538  | 3044599  | 62     | microRNA 4251                                                                 |
| PRDM16       | chr1       | 2985741  | 3355185  | 369445 | PR domain containing 16                                                       |
| ARHGEF16     | chr1       | 3371146  | 3397677  | 26532  | Rho guanine nucleotide exchange factor (GEF) 16                               |
| MEGF6        | chr1       | 3404505  | 3528059  | 123555 | multiple EGF-like-domains 6                                                   |
| C1orf174     | chr1       | 3805696  | 3816857  | 11162  | chromosome 1 open reading frame 174                                           |
| LINC01134    | chr1       | 3816967  | 3832011  | 15045  | long intergenic non-protein coding RNA 1134                                   |
| LOC100133612 | chr1       | 3816967  | 3833879  | 16913  | long intergenic non-protein coding RNA 1134                                   |
| LINC01346    | chr1       | 4000671  | 4012643  | 11973  | long intergenic non-protein coding RNA 1346                                   |
| LOC728716    | chr1       | 4000671  | 4012643  | 11973  | long intergenic non-protein coding RNA 1346                                   |
| LOC284661    | chr1       | 4472110  | 4484744  | 12635  | uncharacterized LOC284661                                                     |
| AJAP1        | chr1       | 4715104  | 4843851  | 128748 | adherens junctions associated protein 1                                       |
| BC037321     | chr1       | 4847557  | 4852183  | 4627   |                                                                               |
| MIR4417      | chr1       | 5624130  | 5624203  | 74     | microRNA 4417                                                                 |
| AK125078     | chr1       | 5621768  | 5728315  | 106548 |                                                                               |
| GPR153       | chr1       | 6307405  | 6321035  | 13631  | G protein-coupled receptor 153                                                |
| ACOT7        | chr1       | 6324331  | 6453826  | 129496 | acyl-CoA thioesterase 7                                                       |
| HES2         | chr1       | 6472497  | 6484730  | 12234  | hes family bHLH transcription factor 2                                        |
| MIR4252      | chr1       | 6489893  | 6489956  | 64     | microRNA 4252                                                                 |
| ESPN         | chr1       | 6484847  | 6521004  | 36158  | espin                                                                         |
| TNFRSF25     | chr1       | 6521213  | 6526255  | 5043   | tumor necrosis factor receptor superfamily, member 25                         |
| PLEKHG5      | chr1       | 6526151  | 6580121  | 53971  | pleckstrin homology domain containing, family G (with RhoGef domain) member 5 |
| NOL9         | chr1       | 6581406  | 6614658  | 33253  | nucleolar protein 9                                                           |
| TAS1R1       | chr1       | 6615337  | 6639817  | 24481  | taste receptor, type 1, member 1                                              |
| ZBTB48       | chr1       | 6640050  | 6649340  | 9291   | zinc finger and BTB domain containing 48                                      |
| KLHL21       | chr1       | 6650778  | 6662929  | 12152  | kelch-like family member 21                                                   |
| CAMTA1       | chr1       | 6845383  | 7829766  | 984384 | calmodulin binding transcription activator 1                                  |
| VAMP3        | chr1       | 7831328  | 7841492  | 10165  | vesicle-associated membrane protein 3                                         |
| PER3         | chr1       | 7844379  | 7905240  | 60862  | period circadian clock 3                                                      |
| UTS2         | chr1       | 7903142  | 7973294  | 70153  | urotensin 2                                                                   |
| TNFRSF9      | chr1       | 7975930  | 8003225  | 27296  | tumor necrosis factor receptor superfamily, member 9                          |
| TRNA_Pseudo  | chr1       | 7990338  | 7990408  | 71     |                                                                               |
| SLC2A7       | chr1       | 9063358  | 9086404  | 23047  | intestinal facilitative glucose transporter 7                                 |
| SLC2A5       | chr1       | 9097004  | 9148510  | 51507  | solute carrier family 2 (facilitated glucose/fructose transporter), member 5  |
| SLC25A33     | chr1       | 9599527  | 9642831  | 43305  | solute carrier family 25 (pyrimidine nucleotide carrier), member 33           |
| TMEM201      | chr1       | 9648931  | 9674935  | 26005  | transmembrane protein 201                                                     |
| C1orf200     | chr1       | 9712667  | 9714644  | 1978   | chromosome 1 open reading frame 200                                           |
| PIK3CD       | chr1       | 9711789  | 9789172  | 77384  | phosphatidylinositol-4,5-bisphosphate 3-kinase, catalytic subunit delta       |
| C1orf127     | chr1       | 11006529 | 11042094 | 35566  | chromosome 1 open reading frame 127                                           |
| TARDBP       | chr1       | 11072678 | 11085549 | 12872  | TAR DNA binding protein                                                       |
| MASP2        | chr1       | 11086579 | 11107296 | 20718  | mannan-binding lectin serine peptidase 2                                      |
| SRM          | chr1       | 11114648 | 11120091 | 5444   | spermidine synthase                                                           |
| EXOSC10      | chr1       | 11126675 | 11159938 | 33264  | exosome component 10                                                          |
| MTOR-AS1     | chr1       | 11203954 | 11209595 | 5642   | MTOR antisense RNA 1                                                          |
| MTOR         | chr1       | 11166587 | 11322608 | 156022 | mechanistic target of rapamycin (serine/threonine kinase)                     |
| ANGPTL7      | chr1       | 11249345 | 11256038 | 6694   | angiopoietin-like 7                                                           |
| UBIAD1       | chr1       | 11333254 | 11348491 | 15238  | UbiA prenyltransferase domain containing 1                                    |
| LOC101929181 | chr1       | 11669587 | 11673411 | 3825   | uncharacterized LOC101929181                                                  |
| FBXO2        | chr1       | 11708417 | 11714888 | 6472   | F-box protein 2                                                               |
| FBXO44       | chr1       | 11714431 | 11723384 | 8954   | F-box protein 44                                                              |
| FBXO6        | chr1       | 11724149 | 11734409 | 10261  | F-box protein 6                                                               |
| AADA44       | chr1       | 12704565 | 12727097 | 22533  | arylacetamide deacetylase-like 4                                              |
| AADA43       | chr1       | 12776117 | 12788726 | 12610  | arylacetamide deacetylase-like 3                                              |
| C1orf158     | chr1       | 12806133 | 12821102 | 14970  | chromosome 1 open reading frame 158                                           |
| PRAMEF12     | chr1       | 12834990 | 12838048 | 3059   | PRAME family member 12                                                        |
| PRAMEF1      | chr1       | 12851545 | 12856777 | 5233   | PRAME family member 1                                                         |
| PRAMEF11     | chr1       | 12884617 | 12891264 | 6648   | PRAME family member 11                                                        |
| LOC649330    | chr1       | 12907229 | 12908235 | 1007   | heterogeneous nuclear ribonucleoprotein C-like                                |
| HNRNPCL1     | chr1       | 12907260 | 12908578 | 1319   | heterogeneous nuclear ribonucleoprotein C-like 1                              |
| PRAMEF2      | chr1       | 12916940 | 12921764 | 4825   | PRAME family member 2                                                         |
| PRAMEF4      | chr1       | 12939032 | 12946025 | 6994   | PRAME family member 4                                                         |
| LOC101929983 | chr1       | 12998504 | 13002353 | 3850   | PRAME family member 9/15-like                                                 |
| PRAMEF9      | chr1       | 12998504 | 13002353 | 3850   | PRAME family member 9                                                         |
| LOC391003    | chr1       | 13035498 | 13039011 | 3514   | PRAME family member-like                                                      |
| PRAMEF5      | chr1       | 12998301 | 13117751 | 119451 | PRAME family member 5                                                         |
| LOC645354    | chr1       | 13161985 | 13167193 | 5209   | PRAME family member 1 pseudogene                                              |
| LOC649324    | chr1       | 13161985 | 13167193 | 5209   | PRAME family member 1 pseudogene                                              |
| HNRNPCL2     | chr1       | 13182959 | 13184326 | 1368   | heterogeneous nuclear ribonucleoprotein C-like 2                              |
| LOC440563    | chr1       | 13182959 | 13184326 | 1368   | heterogeneous nuclear ribonucleoprotein C-like 2                              |
| PRAMEF3      | chr1       | 13328195 | 13331692 | 3498   |                                                                               |
| PRAMEF22     | chr1       | 13328832 | 13331671 | 2840   | PRAME family member 22                                                        |
| PRAMEF6      | chr1       | 13359832 | 13368936 | 9105   | PRAME family member 6                                                         |

|             |      |          |          |        |                                                                            |
|-------------|------|----------|----------|--------|----------------------------------------------------------------------------|
| PRAMEF5     | chr1 | 13359818 | 13369057 | 9240   | PRAME family member 5                                                      |
| PRAMEF8     | chr1 | 13386646 | 13390748 | 4103   | PRAME family member 8                                                      |
| PRAMEF10    | chr1 | 13409127 | 13414502 | 5376   | PRAME family member 10                                                     |
| LOC645382   | chr1 | 13409134 | 13414502 | 5369   | PRAME family member 10-like                                                |
| PRAMEF13    | chr1 | 13447413 | 13452656 | 5244   | PRAME family member 14                                                     |
| PRAMEF14    | chr1 | 13447413 | 13452656 | 5244   | PRAME family member 14                                                     |
| LOC400736   | chr1 | 13447413 | 13452656 | 5244   | PRAME family member-like                                                   |
| PRAMEF19    | chr1 | 13474052 | 13477569 | 3518   | PRAME family member 19                                                     |
| PRAMEF16    | chr1 | 13495253 | 13498259 | 3007   | PRAME family member 16                                                     |
| PRAMEF17    | chr1 | 13495257 | 13498257 | 3001   | PRAME family member 17                                                     |
| PRAMEF20    | chr1 | 13516065 | 13526943 | 10879  | PRAME family member 20                                                     |
| PRAMEF7     | chr1 | 13607699 | 13611533 | 3835   | PRAME family member 7                                                      |
| PRAMEF10    | chr1 | 13629937 | 13635299 | 5363   | PRAME family member 10                                                     |
| PRAMEF15    | chr1 | 13641972 | 13648987 | 7016   | PRAME family member 15                                                     |
| PRAMEF19    | chr1 | 13694888 | 13698405 | 3518   | PRAME family member 19                                                     |
| LRRC38      | chr1 | 13801444 | 13840242 | 38799  | leucine rich repeat containing 38                                          |
| PRDM2       | chr1 | 14026734 | 14151574 | 124841 | PR domain containing 2, with ZNF domain                                    |
| AK124197    | chr1 | 14146461 | 14150513 | 4053   |                                                                            |
| KAZN        | chr1 | 14925212 | 15444544 | 519333 | kazrin, periactin interacting protein                                      |
| TMEM51-AS1  | chr1 | 15438310 | 15478960 | 40651  | TMEM51 antisense RNA 1                                                     |
| C1orf195    | chr1 | 15490691 | 15498120 | 7430   | chromosome 1 open reading frame 195                                        |
| TMEM51      | chr1 | 15479027 | 15546974 | 67948  | transmembrane protein 51                                                   |
| FHAD1       | chr1 | 15573767 | 15726778 | 153012 | forkhead-associated (FHA) phosphopeptide binding domain 1                  |
| AK055853    | chr1 | 15653175 | 15670372 | 17198  |                                                                            |
| EFHD2       | chr1 | 15736390 | 15756839 | 20450  | EF-hand domain family, member D2                                           |
| CTRC        | chr1 | 15764937 | 15773153 | 8217   | chymotrypsin C (caldecrin)                                                 |
| CELA2A      | chr1 | 15783222 | 15798586 | 15365  | chymotrypsin-like elastase family, member 2A                               |
| CELA2B      | chr1 | 15802595 | 15817895 | 15301  | chymotrypsin-like elastase family, member 2B                               |
| CASP9       | chr1 | 15817323 | 15851285 | 33963  | caspase 9, apoptosis-related cysteine peptidase                            |
| PLEKHM2     | chr1 | 16010826 | 16061264 | 50439  | pleckstrin homology domain containing, family M (with RUN domain) member 2 |
| SLC25A34    | chr1 | 16062808 | 16067884 | 5077   | solute carrier family 25, member 34                                        |
| TMEM82      | chr1 | 16068986 | 16074292 | 5307   | transmembrane protein 82                                                   |
| FBLIM1      | chr1 | 16083153 | 16113084 | 29932  | filamin binding LIM protein 1                                              |
| UQCRHL      | chr1 | 16133656 | 16134194 | 539    | ubiquinol-cytochrome c reductase hinge protein-like                        |
| FLJ37453    | chr1 | 16160709 | 16174642 | 13934  | uncharacterized LOC729614                                                  |
| SPEN        | chr1 | 16174358 | 16266950 | 92593  | spen family transcriptional repressor                                      |
| ZBTB17      | chr1 | 16268363 | 16302627 | 34265  | zinc finger and BTB domain containing 17                                   |
| DQ576383    | chr1 | 16317618 | 16317647 | 30     |                                                                            |
| C1orf64     | chr1 | 16330730 | 16333184 | 2455   | chromosome 1 open reading frame 64                                         |
| HSPB7       | chr1 | 16340522 | 16346089 | 5568   | heat shock 27kDa protein family, member 7 (cardiovascular)                 |
| CLCNKA      | chr1 | 16345369 | 16360545 | 15177  | chloride channel, voltage-sensitive Ka                                     |
| CLCNKB      | chr1 | 16355620 | 16383821 | 28202  | chloride channel, voltage-sensitive Kb                                     |
| FAM131C     | chr1 | 16384263 | 16400127 | 15865  | family with sequence similarity 131, member C                              |
| EPHA2       | chr1 | 16450831 | 16482582 | 31752  | EPH receptor A2                                                            |
| ARHGEF19    | chr1 | 16524598 | 16539104 | 14507  | Rho guanine nucleotide exchange factor (GEF) 19                            |
| RSG1        | chr1 | 16558181 | 16563659 | 5479   | REM2 and RAB-like small GTPase 1                                           |
| FBXO42      | chr1 | 16576558 | 16678948 | 102391 | F-box protein 42                                                           |
| SZRD1       | chr1 | 16693524 | 16724643 | 31120  | SUZ RNA binding domain containing 1                                        |
| AL832937    | chr1 | 16721826 | 16724639 | 2814   |                                                                            |
| SPATA21     | chr1 | 16722175 | 16763919 | 41745  | spermatogenesis associated 21                                              |
| NECAP2      | chr1 | 16767166 | 16786584 | 19419  | NECAP endocytosis associated 2                                             |
| CROCCP3     | chr1 | 16793930 | 16819196 | 25267  | ciliary rootlet coiled-coil, rootletin pseudogene 3                        |
| TRNA_Asn    | chr1 | 16847079 | 16847153 | 75     |                                                                            |
| BC036435    | chr1 | 16860349 | 16862144 | 1796   |                                                                            |
| AX747988    | chr1 | 16862254 | 16864669 | 2416   |                                                                            |
| TRNA_Gly    | chr1 | 16872433 | 16872504 | 72     |                                                                            |
| MIR3675     | chr1 | 16875408 | 16875482 | 75     | microRNA 3675                                                              |
| NBPF1       | chr1 | 16888921 | 16940100 | 51180  | neuroblastoma breakpoint family, member 1                                  |
| BC015342    | chr1 | 16955701 | 16956958 | 1258   |                                                                            |
| CROCCP2     | chr1 | 16944750 | 16971178 | 26429  | ciliary rootlet coiled-coil, rootletin pseudogene 2                        |
| FLJ00313    | chr1 | 16956164 | 16971178 | 15015  |                                                                            |
| MST1P2      | chr1 | 16972068 | 16976915 | 4848   | macrophage stimulating 1 (hepatocyte growth factor-like) pseudogene 2      |
| FAM231A     | chr1 | 16999497 | 17000007 | 511    | family with sequence similarity 231, member A                              |
| TRNA_Val    | chr1 | 17006500 | 17006573 | 74     |                                                                            |
| ESPNP       | chr1 | 17017712 | 17046652 | 28941  | espin pseudogene                                                           |
| TRNA_Pseudo | chr1 | 17052060 | 17052133 | 74     |                                                                            |
| TRNA_Gly    | chr1 | 17053779 | 17053850 | 72     |                                                                            |
| MST1L       | chr1 | 17081128 | 17090975 | 9848   | macrophage stimulating 1-like                                              |
| CROCC       | chr1 | 17066767 | 17299474 | 232708 | ciliary rootlet coiled-coil, rootletin                                     |
| AK125737    | chr1 | 17197439 | 17200574 | 3136   |                                                                            |
| TRNA_Asn    | chr1 | 17201957 | 17202031 | 75     |                                                                            |
| BC070363    | chr1 | 17215040 | 17216161 | 1122   |                                                                            |
| DL489931    | chr1 | 17222645 | 17222720 | 76     |                                                                            |
| MFAP2       | chr1 | 17300998 | 17308081 | 7084   | microfibrillar-associated protein 2                                        |
| ATP13A2     | chr1 | 17312452 | 17338467 | 26016  | ATPase type 13A2                                                           |
| PADI1       | chr1 | 17531620 | 17572501 | 40882  | peptidyl arginine deiminase, type I                                        |
| Mir_584     | chr1 | 17581660 | 17581778 | 119    |                                                                            |
| PADI3       | chr1 | 17575592 | 17610727 | 35136  | peptidyl arginine deiminase, type III                                      |
| PADI4       | chr1 | 17634689 | 17690495 | 55807  | peptidyl arginine deiminase, type IV                                       |
| PADI6       | chr1 | 17698690 | 17728195 | 29506  | peptidylarginine deiminase type 6                                          |

|              |      |          |          |        |                                                                                        |
|--------------|------|----------|----------|--------|----------------------------------------------------------------------------------------|
| ARHGEF10L    | chr1 | 17846826 | 18024370 | 177545 | Rho guanine nucleotide exchange factor (GEF) 10-like                                   |
| ARHGEF10L    | chr1 | 17914910 | 17966476 | 51567  | Rho guanine nucleotide exchange factor (GEF) 10-like                                   |
| ACTL8        | chr1 | 18081807 | 18153558 | 71752  | actin-like 8                                                                           |
| IGSF21       | chr1 | 18434239 | 18704977 | 270739 | immunoglobulin superfamily, member 21                                                  |
| PAX7         | chr1 | 18957499 | 19075360 | 117862 | paired box 7                                                                           |
| TAS1R2       | chr1 | 19166092 | 19186155 | 20064  | taste receptor, type 1, member 2                                                       |
| MIR4695      | chr1 | 19209695 | 19209769 | 75     | microRNA 4695                                                                          |
| ALDH4A1      | chr1 | 19197923 | 19229293 | 31371  | aldehyde dehydrogenase 4 family, member A1                                             |
| IFFO2        | chr1 | 19230773 | 19282826 | 52054  | intermediate filament family orphan 2                                                  |
| RPS14P3      | chr1 | 19934300 | 19935138 | 839    | ribosomal protein S14 pseudogene 3                                                     |
| MINOS1       | chr1 | 19923470 | 19956315 | 32846  | mitochondrial inner membrane organizing system 1                                       |
| MINOS1-NBL1  | chr1 | 19923470 | 19984949 | 61480  | MINOS1-NBL1 readthrough                                                                |
| NBL1         | chr1 | 19969722 | 19984949 | 15228  | neuroblastoma 1, DAN family BMP antagonist                                             |
| HTR6         | chr1 | 19991779 | 20007459 | 15681  | 5-hydroxytryptamine (serotonin) receptor 6, G protein-coupled                          |
| TMCO4        | chr1 | 20008705 | 20126758 | 118054 | transmembrane and coiled-coil domains 4                                                |
| RNF186       | chr1 | 20140521 | 20141771 | 1251   | ring finger protein 186                                                                |
| OTUD3        | chr1 | 20208887 | 20239437 | 30551  | OTU deubiquitinase 3                                                                   |
| PLA2G2E      | chr1 | 20246799 | 20250110 | 3312   | phospholipase A2, group IIE                                                            |
| PLA2G2A      | chr1 | 20301923 | 20306932 | 5010   | phospholipase A2, group IIA (platelets, synovial fluid)                                |
| PLA2G5       | chr1 | 20354671 | 20418394 | 63724  | phospholipase A2, group V                                                              |
| PLA2G2D      | chr1 | 20439142 | 20446059 | 6918   | phospholipase A2, group IID                                                            |
| PLA2G2F      | chr1 | 20465822 | 20476879 | 11058  | phospholipase A2, group IIF                                                            |
| PLA2G2C      | chr1 | 20490483 | 20501687 | 11205  | phospholipase A2, group IIC                                                            |
| UBXN10-AS1   | chr1 | 20510735 | 20512979 | 2245   | UBXN10 antisense RNA 1                                                                 |
| UBXN10       | chr1 | 20512577 | 20519942 | 7366   | UBX domain protein 10                                                                  |
| VWA5B1       | chr1 | 20617411 | 20681387 | 63977  | von Willebrand factor A domain containing 5B1                                          |
| LINC01141    | chr1 | 20686293 | 20755287 | 68995  | long intergenic non-protein coding RNA 1141                                            |
| LOC339505    | chr1 | 20686293 | 20755287 | 68995  | long intergenic non-protein coding RNA 1141                                            |
| CAMK2N1      | chr1 | 20808883 | 20812728 | 3846   | calcium/calmodulin-dependent protein kinase II inhibitor 1                             |
| MUL1         | chr1 | 20825940 | 20834674 | 8735   | mitochondrial E3 ubiquitin protein ligase 1                                            |
| CDA          | chr1 | 20915443 | 20945400 | 29958  | cytidine deaminase                                                                     |
| MIR6084      | chr1 | 20960171 | 20960281 | 111    | microRNA 6084                                                                          |
| PINK1        | chr1 | 20959947 | 20978004 | 18058  | PTEN induced putative kinase 1                                                         |
| PINK1-AS     | chr1 | 20969149 | 20978686 | 9538   | PINK1 antisense RNA                                                                    |
| DDOST        | chr1 | 20978259 | 20988037 | 9779   | dolichyl-diphosphooligosaccharide--protein glycosyltransferase subunit (non-catalytic) |
| KIF17        | chr1 | 20990506 | 21044510 | 54005  | kinesin family member 17                                                               |
| SH2D5        | chr1 | 21046224 | 21059330 | 13107  | SH2 domain containing 5                                                                |
| HP1BP3       | chr1 | 21069170 | 21113799 | 44630  | heterochromatin protein 1, binding protein 3                                           |
| EIF4G3       | chr1 | 21132784 | 21503381 | 370598 | eukaryotic translation initiation factor 4 gamma, 3                                    |
| AX747766     | chr1 | 21602542 | 21604868 | 2327   |                                                                                        |
| ECE1         | chr1 | 21543739 | 21672034 | 128296 | endothelin converting enzyme 1                                                         |
| LOC100506801 | chr1 | 21619782 | 21626362 | 6581   | uncharacterized LOC100506801                                                           |
| AK098438     | chr1 | 21749600 | 21754300 | 4701   |                                                                                        |
| BC127868     | chr1 | 21761832 | 21762609 | 778    |                                                                                        |
| NBPF3        | chr1 | 21766582 | 21811393 | 44812  | neuroblastoma breakpoint family, member 3                                              |
| ALPL         | chr1 | 21835857 | 21904905 | 69049  | alkaline phosphatase, liver/bone/kidney                                                |
| RAP1GAP      | chr1 | 21922707 | 21995856 | 73150  | RAP1 GTPase activating protein                                                         |
| USP48        | chr1 | 22004791 | 22109688 | 104898 | ubiquitin specific peptidase 48                                                        |
| LDLRAD2      | chr1 | 22138757 | 22151714 | 12958  | low density lipoprotein receptor class A domain containing 2                           |
| HSPG2        | chr1 | 22148724 | 22263790 | 115067 | heparan sulfate proteoglycan 2                                                         |
| CELA3A       | chr1 | 22328148 | 22339035 | 10888  | chymotrypsin-like elastase family, member 3A                                           |
| LOC101928043 | chr1 | 22350486 | 22352541 | 2056   | uncharacterized LOC101928043                                                           |
| LINC00339    | chr1 | 22351683 | 22357717 | 6035   | long intergenic non-protein coding RNA 339                                             |
| CDC42        | chr1 | 22379119 | 22419436 | 40318  | cell division cycle 42                                                                 |
| WNT4         | chr1 | 22443797 | 22470385 | 26589  | wingless-type MMTV integration site family, member 4                                   |
| AX747207     | chr1 | 25227540 | 25230414 | 2875   |                                                                                        |
| MIR6731      | chr1 | 25245835 | 25245907 | 73     | microRNA 6731                                                                          |
| RUNX3        | chr1 | 25226001 | 25291612 | 65612  | runt-related transcription factor 3                                                    |
| C1orf63      | chr1 | 25568739 | 25664656 | 95918  | arginine/serine-rich protein 1                                                         |
| TMEM50A      | chr1 | 25664788 | 25688852 | 24065  | transmembrane protein 50A                                                              |
| RHCE         | chr1 | 25688739 | 25756683 | 67945  | Rhesus blood group C antigen                                                           |
| TMEM57       | chr1 | 25757348 | 25826698 | 69351  | transmembrane protein 57                                                               |
| LDLRAP1      | chr1 | 25870075 | 25895377 | 25303  | low density lipoprotein receptor adaptor protein 1                                     |
| MAN1C1       | chr1 | 25943958 | 26112698 | 168741 | mannosidase, alpha, class 1C, member 1                                                 |
| SEPN1        | chr1 | 26126666 | 26144713 | 18048  | selenoprotein N, 1                                                                     |
| LOC646471    | chr1 | 26146444 | 26150097 | 3654   | uncharacterized LOC646471                                                              |
| MTFR1L       | chr1 | 26146396 | 26159433 | 13038  | mitochondrial fission regulator 1-like                                                 |
| AUNIP        | chr1 | 26158403 | 26185949 | 27547  | aurora kinase A and ninein interacting protein                                         |
| PAQR7        | chr1 | 26187974 | 26197744 | 9771   | progesterin and adipoQ receptor family member VII                                      |
| STMN1        | chr1 | 26210676 | 26233368 | 22693  | stathmin 1                                                                             |
| MIR3917      | chr1 | 26232852 | 26232945 | 94     | microRNA 3917                                                                          |
| BC042538     | chr1 | 30486798 | 30510456 | 23659  |                                                                                        |
| LOC101929406 | chr1 | 30486798 | 30510459 | 23662  | uncharacterized LOC101929406                                                           |
| SDC3         | chr1 | 31342312 | 31381480 | 39169  | syndecan 3                                                                             |
| SNORD103A    | chr1 | 31408535 | 31408623 | 89     | small nucleolar RNA, C/D box 103A                                                      |
| SNORD103B    | chr1 | 31408535 | 31408623 | 89     | small nucleolar RNA, C/D box 103B                                                      |
| SNORD103A    | chr1 | 31421964 | 31422052 | 89     | small nucleolar RNA, C/D box 103A                                                      |
| SNORD85      | chr1 | 31441009 | 31441084 | 76     | small nucleolar RNA, C/D box 85                                                        |
| PUM1         | chr1 | 31404352 | 31538763 | 134412 | pumilio RNA-binding family member 1                                                    |
| NKAIN1       | chr1 | 31652591 | 31712734 | 60144  | Na+/K+ transporting ATPase interacting 1                                               |

|           |      |          |          |        |                                                                                   |
|-----------|------|----------|----------|--------|-----------------------------------------------------------------------------------|
| SNRNP40   | chr1 | 31732414 | 31769644 | 37231  | small nuclear ribonucleoprotein 40kDa (U5)                                        |
| ZCCHC17   | chr1 | 31769828 | 31837800 | 67973  | zinc finger, CCHC domain containing 17                                            |
| FABP3     | chr1 | 31838099 | 31845923 | 7825   | fatty acid binding protein 3, muscle and heart (mammary-derived growth inhibitor) |
| SERINC2   | chr1 | 31882411 | 31907527 | 25117  | serine incorporator 2                                                             |
| LINC01225 | chr1 | 31971838 | 31974167 | 2330   | long intergenic non-protein coding RNA 1225                                       |
| LOC149086 | chr1 | 31971838 | 31974167 | 2330   | long intergenic non-protein coding RNA 1225                                       |
| LINC01226 | chr1 | 31984035 | 31989846 | 5812   | long intergenic non-protein coding RNA 1226                                       |
| LOC284551 | chr1 | 31984035 | 31989846 | 5812   | long intergenic non-protein coding RNA 1226                                       |
| TINAGL1   | chr1 | 32042085 | 32053287 | 11203  | tubulointerstitial nephritis antigen-like 1                                       |
| HCRTR1    | chr1 | 32083300 | 32098119 | 14820  | hypocretin (orexin) receptor 1                                                    |
| AX747565  | chr1 | 32095467 | 32098435 | 2969   |                                                                                   |
| PEF1      | chr1 | 32095462 | 32110838 | 15377  | penta-EF-hand domain containing 1                                                 |
| COL16A1   | chr1 | 32117847 | 32169768 | 51922  | collagen, type XVI, alpha 1                                                       |
| BAI2      | chr1 | 32192705 | 32229664 | 36960  | brain-specific angiogenesis inhibitor 2                                           |
| MIR4254   | chr1 | 32224260 | 32224336 | 77     | microRNA 4254                                                                     |
| BC069257  | chr1 | 32256024 | 32258424 | 2401   |                                                                                   |
| SPOCD1    | chr1 | 32256022 | 32281652 | 25631  | SPOC domain containing 1                                                          |
| LCK       | chr1 | 32716839 | 32751768 | 34930  | LCK proto-oncogene, Src family tyrosine kinase                                    |
| HDAC1     | chr1 | 32757707 | 32799224 | 41518  | histone deacetylase 1                                                             |
| MARCKSL1  | chr1 | 32799429 | 32801840 | 2412   | MARCKS-like 1                                                                     |
| FAM229A   | chr1 | 32826870 | 32827844 | 975    | family with sequence similarity 229, member A                                     |
| TSSK3     | chr1 | 32827861 | 32829924 | 2064   | testis-specific serine kinase 3                                                   |
| BSDC1     | chr1 | 32830233 | 32860062 | 29830  | BSD domain containing 1                                                           |
| ZBTB8A    | chr1 | 32930657 | 32953459 | 22803  | zinc finger and BTB domain containing 8B                                          |
| ZBTB8B    | chr1 | 32930657 | 33071551 | 140895 | zinc finger and BTB domain containing 8A                                          |
| ZBTB8OS   | chr1 | 33065772 | 33116185 | 50414  | zinc finger and BTB domain containing 8 opposite strand                           |
| S100BPB   | chr1 | 33283042 | 33324480 | 41439  | S100P binding protein                                                             |
| FNDC5     | chr1 | 33327868 | 33338093 | 10226  | fibronectin type III domain containing 5                                          |
| HPCA      | chr1 | 33352097 | 33360247 | 8151   | hippocalcin                                                                       |
| TMEM54    | chr1 | 33360195 | 33366953 | 6759   | transmembrane protein 54                                                          |
| RNF19B    | chr1 | 33402046 | 33430414 | 28369  | ring finger protein 19B                                                           |
| ZSCAN20   | chr1 | 33938231 | 33961995 | 23765  | zinc finger and SCAN domain containing 20                                         |
| CSMD2     | chr1 | 33979598 | 34631443 | 651846 | CUB and Sushi multiple domains 2                                                  |
| HMGB4     | chr1 | 34326075 | 34330392 | 4318   | high mobility group box 4                                                         |
| CSMD2-AS1 | chr1 | 34334556 | 34351059 | 16504  | CSMD2 antisense RNA 1                                                             |
| LOC402779 | chr1 | 34334556 | 34351059 | 16504  | CSMD2 antisense RNA 1                                                             |
| C1orf94   | chr1 | 34632483 | 34684731 | 52249  | chromosome 1 open reading frame 94                                                |
| GJB5      | chr1 | 35220647 | 35224113 | 3467   | gap junction protein, beta 5, 31.1kDa                                             |
| GJB4      | chr1 | 35225341 | 35229325 | 3985   | gap junction protein, beta 4, 30.3kDa                                             |
| Mir_548   | chr1 | 35244163 | 35244247 | 85     |                                                                                   |
| GJB3      | chr1 | 35246789 | 35251967 | 5179   | gap junction protein, beta 3, 31kDa                                               |
| GJA4      | chr1 | 35258170 | 35261348 | 3179   | gap junction protein, alpha 4, 37kDa                                              |
| SMIM12    | chr1 | 35315962 | 35325417 | 9456   | small integral membrane protein 12                                                |
| DLGAP3    | chr1 | 35331036 | 35370984 | 39949  | discs, large (Drosophila) homolog-associated protein 3                            |
| LOC653160 | chr1 | 35441299 | 35450948 | 9650   | uncharacterized LOC653160                                                         |
| ZMYM6NB   | chr1 | 35447126 | 35450948 | 3823   | ZMYM6 neighbor                                                                    |
| ZMYM6     | chr1 | 35449367 | 35497569 | 48203  | zinc finger, MYM-type 6                                                           |
| ZMYM1     | chr1 | 35525386 | 35581459 | 56074  | zinc finger, MYM-type 1                                                           |
| BX537811  | chr1 | 35641980 | 35646083 | 4104   |                                                                                   |
| AL831889  | chr1 | 35641980 | 35646083 | 4104   |                                                                                   |
| SFPQ      | chr1 | 35649200 | 35658743 | 9544   | splicing factor proline/glutamine-rich                                            |
| ZMYM4     | chr1 | 35734567 | 35887545 | 152979 | zinc finger, MYM-type 4                                                           |
| AF119915  | chr1 | 35833677 | 35835012 | 1336   |                                                                                   |
| KIAA0319L | chr1 | 35899090 | 36023551 | 124462 | KIAA0319-like                                                                     |
| NCDN      | chr1 | 36023392 | 36032380 | 8989   | neurochondrin                                                                     |
| TFAP2E    | chr1 | 36038970 | 36060927 | 21958  | transcription factor AP-2 epsilon (activating enhancer binding protein 2 epsilon) |
| PSMB2     | chr1 | 36035412 | 36107445 | 72034  | proteasome (prosome, macropain) subunit, beta type, 2                             |
| C1orf216  | chr1 | 36179476 | 36184790 | 5315   | chromosome 1 open reading frame 216                                               |
| CLSPN     | chr1 | 36197712 | 36235551 | 37840  | claspin                                                                           |
| AGO4      | chr1 | 36273827 | 36323490 | 49664  | argonaute RISC catalytic component 4                                              |
| AGO1      | chr1 | 36335408 | 36389899 | 54492  | argonaute RISC catalytic component 1                                              |
| AK025726  | chr1 | 36391432 | 36395210 | 3779   |                                                                                   |
| AGO3      | chr1 | 36396318 | 36522063 | 125746 | argonaute RISC catalytic component 3                                              |
| TEKT2     | chr1 | 36549675 | 36553876 | 4202   | tektin 2 (testicular)                                                             |
| CSF3R     | chr1 | 36931643 | 36948915 | 17273  | colony stimulating factor 3 receptor (granulocyte)                                |
| GRIK3     | chr1 | 37261127 | 37499844 | 238718 | glutamate receptor, ionotropic, kainate 3                                         |
| MIR4255   | chr1 | 37627163 | 37627235 | 73     | microRNA 4255                                                                     |
| AX747480  | chr1 | 38147242 | 38149864 | 2623   |                                                                                   |
| C1orf109  | chr1 | 38147241 | 38156192 | 8952   | chromosome 1 open reading frame 109                                               |
| CDCA8     | chr1 | 38158072 | 38175391 | 17320  | cell division cycle associated 8                                                  |
| EPHA10    | chr1 | 38179552 | 38230824 | 51273  | EPH receptor A10                                                                  |
| INPP5B    | chr1 | 38326368 | 38412729 | 86362  | inositol polyphosphate-5-phosphatase, 75kDa                                       |
| SF3A3     | chr1 | 38422651 | 38455761 | 33111  | splicing factor 3a, subunit 3, 60kDa                                              |
| FHL3      | chr1 | 38462441 | 38471187 | 8747   | four and a half LIM domains 3                                                     |
| UTP11L    | chr1 | 38478383 | 38490497 | 12115  | UTP11-like, U3 small nucleolar ribonucleoprotein (yeast)                          |
| POU3F1    | chr1 | 38509522 | 38512450 | 2929   | POU class 3 homeobox 1                                                            |
| MIR3659   | chr1 | 38554902 | 38555001 | 100    | microRNA 3659                                                                     |
| LINC01343 | chr1 | 38674705 | 38680439 | 5735   | long intergenic non-protein coding RNA 1343                                       |
| LOC339442 | chr1 | 38674705 | 38680439 | 5735   | long intergenic non-protein coding RNA 1343                                       |
| RRAGC     | chr1 | 39303868 | 39340166 | 36299  | Ras-related GTP binding C                                                         |

|              |      |          |          |         |                                                                            |
|--------------|------|----------|----------|---------|----------------------------------------------------------------------------|
| MYCBP        | chr1 | 39328161 | 39339050 | 10890   | MYC binding protein                                                        |
| GJA9-MYCBP   | chr1 | 39328161 | 39347298 | 19138   | GJA9-MYCBP readthrough                                                     |
| GJA9         | chr1 | 39339738 | 39347298 | 7561    | gap junction protein, alpha 9, 59kDa                                       |
| RHBDL2       | chr1 | 39351478 | 39407456 | 55979   | rhomboid, veinlet-like 2 (Drosophila)                                      |
| MACF1        | chr1 | 39670422 | 39748740 | 78319   | microtubule-actin crosslinking factor 1                                    |
| MACF1        | chr1 | 39547088 | 39952810 | 405723  | microtubule-actin crosslinking factor 1                                    |
| KIAA0754     | chr1 | 39875175 | 39882154 | 6980    | KIAA0754                                                                   |
| BMP8A        | chr1 | 39957317 | 39995541 | 38225   | bone morphogenetic protein 8a                                              |
| PPIEL        | chr1 | 39987951 | 40025370 | 37420   | peptidylprolyl isomerase E-like pseudogene                                 |
| SNORA55      | chr1 | 40033045 | 40033182 | 138     | small nucleolar RNA, H/ACA box 55                                          |
| PABPC4       | chr1 | 40026484 | 40042521 | 16038   | poly(A) binding protein, cytoplasmic 4 (inducible form)                    |
| LOC101929516 | chr1 | 40030741 | 40038875 | 8135    | uncharacterized LOC101929516                                               |
| HEYL         | chr1 | 40089102 | 40105348 | 16247   | hes-related family bHLH transcription factor with YRPW motif-like          |
| NT5C1A       | chr1 | 40124792 | 40137710 | 12919   | 5'-nucleotidase, cytosolic IA                                              |
| HPCAL4       | chr1 | 40144319 | 40157382 | 13064   | hippocalcin like 4                                                         |
| PPIE         | chr1 | 40204516 | 40229586 | 25071   | peptidylprolyl isomerase E (cyclophilin E)                                 |
| AB075489     | chr1 | 40222853 | 40225715 | 2863    |                                                                            |
| OXCT2        | chr1 | 40235196 | 40237020 | 1825    | 3-oxoacid CoA transferase 2                                                |
| BMP8B        | chr1 | 40223902 | 40254533 | 30632   | bone morphogenetic protein 8b                                              |
| TRIT1        | chr1 | 40306705 | 40349177 | 42473   | tRNA isopentenyltransferase 1                                              |
| MYCL         | chr1 | 40361095 | 40367687 | 6593    | v-myc avian myelocytomatosis viral oncogene lung carcinoma derived homolog |
| MYCL1        | chr1 | 40361095 | 40367687 | 6593    |                                                                            |
| BC069694     | chr1 | 40420819 | 40422587 | 1769    |                                                                            |
| MFSD2A       | chr1 | 40420783 | 40435640 | 14858   | major facilitator superfamily domain containing 2A                         |
| CAP1         | chr1 | 40506254 | 40538321 | 32068   | CAP, adenylate cyclase-associated protein 1 (yeast)                        |
| PPT1         | chr1 | 40538381 | 40563142 | 24762   | palmitoyl-protein thioesterase 1                                           |
| RLF          | chr1 | 40627040 | 40706593 | 79554   | rearranged L-myc fusion                                                    |
| TMCO2        | chr1 | 40713572 | 40717365 | 3794    | transmembrane and coiled-coil domains 2                                    |
| ZMPSTE24     | chr1 | 40723721 | 40759856 | 36136   | zinc metalloproteinase STE24                                               |
| COL9A2       | chr1 | 40766162 | 40783060 | 16899   | collagen, type IX, alpha 2                                                 |
| ZFP69        | chr1 | 40943301 | 40962015 | 18715   | ZFP69 zinc finger protein                                                  |
| EXO5         | chr1 | 40974432 | 40982214 | 7783    | exonuclease 5                                                              |
| ZNF684       | chr1 | 40997232 | 41013841 | 16610   | zinc finger protein 684                                                    |
| RIMS3        | chr1 | 41086351 | 41131324 | 44974   | regulating synaptic membrane exocytosis 3                                  |
| EFCAB14-AS1  | chr1 | 47139707 | 47157769 | 18063   | EFCAB14 antisense RNA 1                                                    |
| EFCAB14      | chr1 | 47124358 | 47184736 | 60379   | EF-hand calcium binding domain 14                                          |
| CYP4B1       | chr1 | 47264669 | 47285021 | 20353   | cytochrome P450, family 4, subfamily B, polypeptide 1                      |
| CYP4Z2P      | chr1 | 47308766 | 47366147 | 57382   | cytochrome P450, family 4, subfamily Z, polypeptide 2, pseudogene          |
| CYP4A11      | chr1 | 47394845 | 47407156 | 12312   | cytochrome P450, family 4, subfamily A, polypeptide 11                     |
| CYP4X1       | chr1 | 47427035 | 47516423 | 89389   | cytochrome P450, family 4, subfamily X, polypeptide 1                      |
| CYP4Z1       | chr1 | 47533159 | 47583992 | 50834   | cytochrome P450, family 4, subfamily Z, polypeptide 1                      |
| CYP4A22      | chr1 | 47603106 | 47614526 | 11421   | cytochrome P450, family 4, subfamily A, polypeptide 22                     |
| LINC00853    | chr1 | 47644921 | 47646011 | 1091    | long intergenic non-protein coding RNA 853                                 |
| PDZK1IP1     | chr1 | 47649260 | 47655771 | 6512    | PDZK1 interacting protein 1                                                |
| TAL1         | chr1 | 47681961 | 47698007 | 16047   | T-cell acute lymphocytic leukemia 1                                        |
| JA375062     | chr1 | 47691628 | 47691655 | 28      |                                                                            |
| STIL         | chr1 | 47694867 | 47779819 | 84953   | SCL/TAL1 interrupting locus                                                |
| CMPK1        | chr1 | 47799468 | 47844511 | 45044   | cytidine monophosphate (UMP-CMP) kinase 1, cytosolic                       |
| AX748181     | chr1 | 47859449 | 47861215 | 1767    |                                                                            |
| TRABD2B      | chr1 | 48226199 | 48462562 | 236364  | TraB domain containing 2B                                                  |
| SKINTL       | chr1 | 48567386 | 48648100 | 80715   | Skint-like, pseudogene                                                     |
| SLC5A9       | chr1 | 48688356 | 48714316 | 25961   | solute carrier family 5 (sodium/sugar cotransporter), member 9             |
| SPATA6       | chr1 | 48761043 | 48937880 | 176838  | spermatogenesis associated 6                                               |
| BEND5        | chr1 | 49193539 | 49242547 | 49009   | BEN domain containing 5                                                    |
| LOC101929721 | chr1 | 49723082 | 49734966 | 11885   | uncharacterized LOC101929721                                               |
| AGBL4        | chr1 | 48998526 | 50489626 | 1491101 | ATP/GTP binding protein-like 4                                             |
| AGBL4-IT1    | chr1 | 49839872 | 49937757 | 97886   | AGBL4 intronic transcript 1 (non-protein coding)                           |
| ELAVL4       | chr1 | 50513685 | 50669457 | 155773  | ELAV like neuron-specific RNA binding protein 4                            |
| DMRTA2       | chr1 | 50883222 | 50889119 | 5898    | DMRT-like family A2                                                        |
| FAF1         | chr1 | 50906934 | 51425936 | 519003  | Fas (TNFRSF6) associated factor 1                                          |
| CDKN2C       | chr1 | 51434366 | 51440309 | 5944    | cyclin-dependent kinase inhibitor 2C (p18, inhibits CDK4)                  |
| C1orf185     | chr1 | 51567905 | 51613754 | 45850   | chromosome 1 open reading frame 185                                        |
| RNF11        | chr1 | 51701944 | 51739119 | 37176   | ring finger protein 11                                                     |
| TTC39A       | chr1 | 51752929 | 51810788 | 57860   | tetratricopeptide repeat domain 39A                                        |
| TTC39A-AS1   | chr1 | 51795325 | 51796953 | 1629    | TTC39A antisense RNA 1                                                     |
| EPS15        | chr1 | 51819934 | 51984995 | 165062  | epidermal growth factor receptor pathway substrate 15                      |
| OSBPL9       | chr1 | 52042850 | 52254891 | 212042  | oxysterol-binding protein-like protein 9                                   |
| RAB3B        | chr1 | 52373627 | 52456436 | 82810   | RAB3B, member RAS oncogene family                                          |
| KTI12        | chr1 | 52497776 | 52499472 | 1697    | KTI12 homolog, chromatin associated (S. cerevisiae)                        |
| TXNDC12      | chr1 | 52485803 | 52521843 | 36041   | thioredoxin domain containing 12 (endoplasmic reticulum)                   |
| BTF3L4       | chr1 | 52521856 | 52556388 | 34533   | basic transcription factor 3-like 4                                        |
| ZFYVE9       | chr1 | 52607765 | 52812358 | 204594  | zinc finger, FYVE domain containing 9                                      |
| CC2D1B       | chr1 | 52816264 | 52831877 | 15614   | coiled-coil and C2 domain containing 1B                                    |
| ORC1         | chr1 | 52838500 | 52870143 | 31644   | origin recognition complex, subunit 1                                      |
| PRPF38A      | chr1 | 52870218 | 52883992 | 13775   | pre-mRNA processing factor 38A                                             |
| ZCCHC11      | chr1 | 52888947 | 53019130 | 130184  | zinc finger, CCHC domain containing 11                                     |
| GPX7         | chr1 | 53068042 | 53074723 | 6682    | glutathione peroxidase 7                                                   |
| FAM159A      | chr1 | 53099065 | 53135339 | 36275   | family with sequence similarity 159, member A                              |
| SELRC1       | chr1 | 53152013 | 53164038 | 12026   |                                                                            |
| COA7         | chr1 | 53152013 | 53164038 | 12026   | cytochrome c oxidase assembly factor 7 (putative)                          |

|              |      |          |          |         |                                                                                            |
|--------------|------|----------|----------|---------|--------------------------------------------------------------------------------------------|
| ZYG11B       | chr1 | 53192130 | 53293013 | 100884  | zyg-11 family member B, cell cycle regulator                                               |
| ZYG11A       | chr1 | 53308182 | 53360247 | 52066   | zyg-11 family member A, cell cycle regulator                                               |
| ECHDC2       | chr1 | 53361581 | 53392851 | 31271   | enoyl CoA hydratase domain containing 2                                                    |
| SCP2         | chr1 | 53392900 | 53517289 | 124390  | sterol carrier protein 2                                                                   |
| PODN         | chr1 | 53527723 | 53551174 | 23452   | podocan                                                                                    |
| SLC1A7       | chr1 | 53552850 | 53608304 | 55455   | solute carrier family 1 (glutamate transporter), member 7                                  |
| AX748428     | chr1 | 53580247 | 53584281 | 4035    |                                                                                            |
| CPT2         | chr1 | 53662100 | 53679869 | 17770   | carnitine palmitoyltransferase 2                                                           |
| C1orf123     | chr1 | 53679771 | 53686289 | 6519    | chromosome 1 open reading frame 123                                                        |
| MAGOH        | chr1 | 53692563 | 53704282 | 11720   | mago-nashi homolog, proliferation-associated (Drosophila)                                  |
| LOC100507564 | chr1 | 53704281 | 53708455 | 4175    | uncharacterized LOC100507564                                                               |
| LRP8         | chr1 | 53708040 | 53793821 | 85782   | low density lipoprotein receptor-related protein 8, apolipoprotein e receptor              |
| AK097571     | chr1 | 53793904 | 53802889 | 8986    |                                                                                            |
| SLC25A3P1    | chr1 | 53904042 | 53905693 | 1652    | solute carrier family 25 (mitochondrial carrier; phosphate carrier), member 3 pseudogene 1 |
| DMRTB1       | chr1 | 53925071 | 53933158 | 8088    | DMRT-like family B with proline-rich C-terminal, 1                                         |
| GLIS1        | chr1 | 53971905 | 54199877 | 227973  | GLIS family zinc finger 1                                                                  |
| NDC1         | chr1 | 54231133 | 54304225 | 73093   | NDC1 transmembrane nucleoporin                                                             |
| TMEM59       | chr1 | 54497348 | 54519111 | 21764   | transmembrane protein 59                                                                   |
| MIR4781      | chr1 | 54519751 | 54519827 | 77      | microRNA 4781                                                                              |
| TCEANC2      | chr1 | 54519273 | 54578192 | 58920   | transcription elongation factor A (SII) N-terminal and central domain containing 2         |
| CDCP2        | chr1 | 54604667 | 54618679 | 14013   | CUB domain containing protein 2                                                            |
| ACOT11       | chr1 | 55007929 | 55100417 | 92489   | acyl-CoA thioesterase 11                                                                   |
| MROH7        | chr1 | 55107412 | 55175940 | 68529   | maestro heat-like repeat family member 7                                                   |
| MROH7-TTC4   | chr1 | 55107412 | 55208328 | 100917  | MROH7-TTC4 readthrough (NMD candidate)                                                     |
| HEATR8-TTC4  | chr1 | 55107426 | 55208328 | 100903  | MROH7-TTC4 readthrough (NMD candidate)                                                     |
| TTC4         | chr1 | 55181494 | 55208328 | 26835   | tetratricopeptide repeat domain 4                                                          |
| PARS2        | chr1 | 55222570 | 55230226 | 7657    | prolyl-tRNA synthetase 2, mitochondrial (putative)                                         |
| TTC22        | chr1 | 55246751 | 55266941 | 20191   | tetratricopeptide repeat domain 22                                                         |
| C1orf177     | chr1 | 55271735 | 55307937 | 36203   | chromosome 1 open reading frame 177                                                        |
| TRNA_Lys     | chr1 | 55423541 | 55423614 | 74      |                                                                                            |
| TMEM61       | chr1 | 55446464 | 55457966 | 11503   | transmembrane protein 61                                                                   |
| BSND         | chr1 | 55464616 | 55474465 | 9850    | barttin CLCNK-type chloride channel accessory beta subunit                                 |
| PCSK9        | chr1 | 55505148 | 55530526 | 25379   | proprotein convertase subtilisin/kexin type 9                                              |
| USP24        | chr1 | 55532031 | 55681039 | 149009  | ubiquitin specific peptidase 24                                                            |
| LOC100507634 | chr1 | 55681080 | 55683128 | 2049    | uncharacterized LOC100507634                                                               |
| MIR4422      | chr1 | 55691313 | 55691396 | 84      | microRNA 4422                                                                              |
| Y_RNA        | chr1 | 55950543 | 55950645 | 103     |                                                                                            |
| AK127270     | chr1 | 56046709 | 56200675 | 153967  |                                                                                            |
| PPAP2B       | chr1 | 56960418 | 57045257 | 84840   | phosphatidic acid phosphatase type 2B                                                      |
| PRKAA2       | chr1 | 57110989 | 57181008 | 70020   | protein kinase, AMP-activated, alpha 2 catalytic subunit                                   |
| C1orf168     | chr1 | 57184476 | 57285369 | 100894  | chromosome 1 open reading frame 168                                                        |
| BC048114     | chr1 | 57289353 | 57292593 | 3241    |                                                                                            |
| C8A          | chr1 | 57320442 | 57383894 | 63453   | complement component 8, alpha polypeptide                                                  |
| C8B          | chr1 | 57394882 | 57431813 | 36932   | complement component 8, beta polypeptide                                                   |
| DAB1         | chr1 | 57463578 | 59012446 | 1548869 | Dab, reelin signal transducer, homolog 1 (Drosophila)                                      |
| BC047487     | chr1 | 58326214 | 58328786 | 2573    |                                                                                            |
| DAB1-AS1     | chr1 | 58326214 | 58328786 | 2573    | DAB1 antisense RNA 1                                                                       |
| BC033978     | chr1 | 58326265 | 58328786 | 2522    |                                                                                            |
| AX746780     | chr1 | 58933598 | 58934677 | 1080    |                                                                                            |
| OMA1         | chr1 | 58939503 | 59012446 | 72944   | OMA1 zinc metalloproteinase                                                                |
| TACSTD2      | chr1 | 59041094 | 59043166 | 2073    | tumor-associated calcium signal transducer 2                                               |
| MYSM1        | chr1 | 59120410 | 59165747 | 45338   | Myb-like, SWIRM and MPN domains 1                                                          |
| JUN          | chr1 | 59246462 | 59249785 | 3324    | jun proto-oncogene                                                                         |
| LINC01135    | chr1 | 59250822 | 59365384 | 114563  | long intergenic non-protein coding RNA 1135                                                |
| LOC100131060 | chr1 | 59250822 | 59365384 | 114563  | long intergenic non-protein coding RNA 1135                                                |
| LINC01358    | chr1 | 59486147 | 59553919 | 67773   | long intergenic non-protein coding RNA 1358                                                |
| HSD52        | chr1 | 59597607 | 59612479 | 14873   | uncharacterized LOC729467                                                                  |
| FGGY         | chr1 | 59762624 | 60228402 | 465779  | FGGY carbohydrate kinase domain containing                                                 |
| MIR4711      | chr1 | 60198898 | 60198968 | 71      | microRNA 4711                                                                              |
| LOC101926944 | chr1 | 60238466 | 60254501 | 16036   | uncharacterized LOC101926944                                                               |
| BC042048     | chr1 | 60238466 | 60254501 | 16036   |                                                                                            |
| HOOB1        | chr1 | 60280462 | 60342050 | 61589   | hook microtubule-tethering protein 1                                                       |
| CYP2J2       | chr1 | 60358979 | 60392423 | 33445   | cytochrome P450, family 2, subfamily J, polypeptide 2                                      |
| C1orf87      | chr1 | 60454823 | 60539442 | 84620   | chromosome 1 open reading frame 87                                                         |
| LOC101926964 | chr1 | 61125302 | 61291256 | 165955  | uncharacterized LOC101926964                                                               |
| AK097193     | chr1 | 61125302 | 61291256 | 165955  |                                                                                            |
| NFIA-AS2     | chr1 | 61405915 | 61436448 | 30534   | NFIA antisense RNA 2                                                                       |
| BC030753     | chr1 | 61405915 | 61436448 | 30534   |                                                                                            |
| NFIA-AS1     | chr1 | 61714616 | 61719190 | 4575    | NFIA antisense RNA 1                                                                       |
| NFIA         | chr1 | 61542945 | 61928460 | 38516   | nuclear factor I/A                                                                         |
| MGC34796     | chr1 | 62119913 | 62121800 | 1888    | sepiapterin reductase (7,8-dihydrobiopterin:NADP+ oxidoreductase) pseudogene               |
| TM2D1        | chr1 | 62146718 | 62191095 | 44378   | TM2 domain containing 1                                                                    |
| INADL        | chr1 | 62208148 | 62644347 | 436200  | InaD-like (Drosophila)                                                                     |
| L1TD1        | chr1 | 62660473 | 62678001 | 17529   | LINE-1 type transposase domain containing 1                                                |
| KANK4        | chr1 | 62701836 | 62785083 | 83248   | KN motif and ankyrin repeat domains 4                                                      |
| USP1         | chr1 | 62901974 | 62917475 | 15502   | ubiquitin specific peptidase 1                                                             |
| DOCK7        | chr1 | 62920396 | 63154039 | 233644  | dedicator of cytokinesis 7                                                                 |
| ANGPTL3      | chr1 | 63063157 | 63071976 | 8820    | angiopoietin-like 3                                                                        |
| ATG4C        | chr1 | 63249776 | 63330941 | 81166   | autophagy related 4C, cysteine peptidase                                                   |
| LINC00466    | chr1 | 63624753 | 63782901 | 158149  | long intergenic non-protein coding RNA 466                                                 |

|              |      |          |          |        |                                                                       |
|--------------|------|----------|----------|--------|-----------------------------------------------------------------------|
| 7SK          | chr1 | 63704613 | 63704845 | 233    | RNA, 7SK small nuclear                                                |
| FOXD3-AS1    | chr1 | 63786554 | 63790112 | 3559   | FOXD3 antisense RNA 1 (head to head)                                  |
| FOXD3        | chr1 | 63788729 | 63790797 | 2069   | forkhead box D3                                                       |
| MIR6068      | chr1 | 63792595 | 63792655 | 61     | microRNA 6068                                                         |
| U7           | chr1 | 63799429 | 63799491 | 63     | RNA, U7 small nuclear 86 pseudogene                                   |
| ALG6         | chr1 | 63833260 | 63904233 | 70974  | ALG6, alpha-1,3-glucosyltransferase                                   |
| ITGB3BP      | chr1 | 63906440 | 63988944 | 82505  | integrin beta 3 binding protein (beta3-endonexin)                     |
| EFCAB7       | chr1 | 63989012 | 64038364 | 49353  | EF-hand calcium binding domain 7                                      |
| DLEU2L       | chr1 | 64014650 | 64016307 | 1658   | deleted in lymphocytic leukemia 2-like                                |
| PGM1         | chr1 | 64058946 | 64125916 | 66971  | phosphoglucomutase 1                                                  |
| Mir_544      | chr1 | 64262024 | 64262128 | 105    |                                                                       |
| ROR1         | chr1 | 64239689 | 64647179 | 407491 | receptor tyrosine kinase-like orphan receptor 1                       |
| BC040909     | chr1 | 64560124 | 64577888 | 17765  |                                                                       |
| ROR1-AS1     | chr1 | 64560124 | 64579474 | 19351  | ROR1 antisense RNA 1                                                  |
| AK096291     | chr1 | 64571005 | 64636980 | 65976  |                                                                       |
| UBE2U        | chr1 | 64669489 | 64710027 | 40539  | ubiquitin-conjugating enzyme E2U (putative)                           |
| MIR4794      | chr1 | 65045529 | 65045604 | 76     | microRNA 4794                                                         |
| CACHD1       | chr1 | 64936475 | 65158741 | 222267 | cache domain containing 1                                             |
| AK026777     | chr1 | 65154981 | 65158736 | 3756   |                                                                       |
| RAVER2       | chr1 | 65210777 | 65298914 | 88138  | ribonucleoprotein, PTB-binding 2                                      |
| AK128734     | chr1 | 65338382 | 65343856 | 5475   |                                                                       |
| JAK1         | chr1 | 65298905 | 65432619 | 133715 | Janus kinase 1                                                        |
| BC035370     | chr1 | 65445259 | 65468159 | 22901  |                                                                       |
| LINC01359    | chr1 | 65445259 | 65468159 | 22901  | long intergenic non-protein coding RNA 1359                           |
| MIR3671      | chr1 | 65523437 | 65523525 | 89     | microRNA 3671                                                         |
| MIR101-1     | chr1 | 65524116 | 65524191 | 76     | microRNA 101-1                                                        |
| AK4          | chr1 | 65613231 | 65697828 | 84598  | adenylate kinase 4                                                    |
| AK123450     | chr1 | 65720144 | 65721848 | 1705   |                                                                       |
| DNAJC6       | chr1 | 65720147 | 65881552 | 161406 | DnaJ (Hsp40) homolog, subfamily C, member 6                           |
| LEPROT       | chr1 | 65886130 | 65901690 | 15561  | leptin receptor overlapping transcript                                |
| LEPR         | chr1 | 65886130 | 66103176 | 217047 | leptin receptor                                                       |
| LOC101927139 | chr1 | 66508182 | 66516401 | 8220   | uncharacterized LOC101927139                                          |
| PDE4B        | chr1 | 66258192 | 66840262 | 582071 | phosphodiesterase 4B, cAMP-specific                                   |
| U4           | chr1 | 66560143 | 66560229 | 87     | RNA, U4A small nuclear                                                |
| MIR3117      | chr1 | 67094122 | 67094200 | 79     | microRNA 3117                                                         |
| SGIP1        | chr1 | 66999824 | 67210768 | 210945 | SH3-domain GRB2-like (endophilin) interacting protein 1               |
| AK298300     | chr1 | 67132271 | 67142710 | 10440  |                                                                       |
| TCTEX1D1     | chr1 | 67218139 | 67244730 | 26592  | Tctex1 domain containing 1                                            |
| INSL5        | chr1 | 67263423 | 67266942 | 3520   | insulin-like 5                                                        |
| WDR78        | chr1 | 67278571 | 67390570 | 112000 | WD repeat domain 78                                                   |
| MIER1        | chr1 | 67390577 | 67454302 | 63726  | mesoderm induction early response 1, transcriptional regulator        |
| SLC35D1      | chr1 | 67465014 | 67520080 | 55067  | solute carrier family 35 (UDP-GlcA/UDP-GalNAc transporter), member D1 |
| C1orf141     | chr1 | 67557858 | 67600654 | 42797  | chromosome 1 open reading frame 141                                   |
| IL23R        | chr1 | 67604589 | 67725650 | 121062 | interleukin 23 receptor                                               |
| IL12RB2      | chr1 | 67773046 | 67862583 | 89538  | interleukin 12 receptor, beta 2                                       |
| SERBP1       | chr1 | 67873492 | 67896123 | 22632  | SERPINE1 mRNA binding protein 1                                       |
| GADD45A      | chr1 | 68150859 | 68154021 | 3163   | growth arrest and DNA-damage-inducible, alpha                         |
| GNG12        | chr1 | 68167148 | 68299155 | 132008 | guanine nucleotide binding protein (G protein), gamma 12              |
| U7           | chr1 | 68238275 | 68238336 | 62     | RNA, U7 small nuclear 86 pseudogene                                   |
| GNG12-AS1    | chr1 | 68297970 | 68668670 | 370701 | GNG12 antisense RNA 1                                                 |
| DIRAS3       | chr1 | 68511644 | 68516460 | 4817   | DIRAS family, GTP-binding RAS-like 3                                  |
| WLS          | chr1 | 68564141 | 68698284 | 134144 | wntless Wnt ligand secretion mediator                                 |
| MIR1262      | chr1 | 68649200 | 68649293 | 94     | microRNA 1262                                                         |
| JB175146     | chr1 | 68649301 | 68649321 | 21     |                                                                       |
| RPE65        | chr1 | 68894506 | 68915642 | 21137  | retinal pigment epithelium-specific protein 65kDa                     |
| DEPDC1       | chr1 | 68939834 | 68962904 | 23071  | DEP domain containing 1                                               |
| DEPDC1-AS1   | chr1 | 68962358 | 69004310 | 41953  | DEPDC1 antisense RNA 1                                                |
| BC020917     | chr1 | 68962358 | 69004310 | 41953  |                                                                       |
| LRRC7        | chr1 | 70032867 | 70589171 | 556305 | leucine rich repeat containing 7                                      |
| PIN1P1       | chr1 | 70385004 | 70386000 | 997    | peptidylprolyl cis/trans isomerase, NIMA-interacting 1 pseudogene 1   |
| LRRC40       | chr1 | 70610484 | 70671361 | 60878  | leucine rich repeat containing 40                                     |
| SRSF11       | chr1 | 70671364 | 70717701 | 46338  | serine/arginine-rich splicing factor 11                               |
| ANKRD13C     | chr1 | 70724684 | 70820417 | 95734  | ankyrin repeat domain 13C                                             |
| HHLA3        | chr1 | 70820492 | 70833705 | 13214  | HERV-H LTR-associating 3                                              |
| CTH          | chr1 | 70876900 | 70905534 | 28635  | cystathionine gamma-lyase                                             |
| LOC101927244 | chr1 | 71172135 | 71252151 | 80017  | uncharacterized LOC101927244                                          |
| BC041441     | chr1 | 71172135 | 71252151 | 80017  |                                                                       |
| PTGER3       | chr1 | 71318035 | 71513491 | 195457 | prostaglandin E receptor 3 (subtype EP3)                              |
| ZRANB2-AS2   | chr1 | 71547006 | 71703406 | 156401 | ZRANB2 antisense RNA 2 (head to head)                                 |
| NEGR1        | chr1 | 71868624 | 72748405 | 879782 | neuronal growth regulator 1                                           |
| SLC44A5      | chr1 | 75667815 | 76143610 | 475796 | solute carrier family 44, member 5                                    |
| CR936677     | chr1 | 76103850 | 76188721 | 84872  |                                                                       |
| ACADM        | chr1 | 76190031 | 76229363 | 39333  | acyl-CoA dehydrogenase, C-4 to C-12 straight chain                    |
| SNORD45C     | chr1 | 76252756 | 76252834 | 79     | small nucleolar RNA, C/D box 45C                                      |
| SNORD45A     | chr1 | 76253573 | 76253657 | 85     | small nucleolar RNA, C/D box 45A                                      |
| SNORD45B     | chr1 | 76255161 | 76255232 | 72     | small nucleolar RNA, C/D box 45B                                      |
| RABGGTB      | chr1 | 76251878 | 76260775 | 8898   | Rab geranylgeranyltransferase, beta subunit                           |
| MSH4         | chr1 | 76262555 | 76378923 | 116369 | mutS homolog 4                                                        |
| MGC27382     | chr1 | 78695282 | 78835147 | 139866 | uncharacterized MGC27382                                              |
| PTGFR        | chr1 | 78956727 | 79006386 | 49660  | prostaglandin F receptor (FP)                                         |

|              |      |          |          |        |                                                                      |
|--------------|------|----------|----------|--------|----------------------------------------------------------------------|
| IFI44L       | chr1 | 79086087 | 79111830 | 25744  | interferon-induced protein 44-like                                   |
| IFI44        | chr1 | 79115476 | 79129763 | 14288  | interferon-induced protein 44                                        |
| Mir_548      | chr1 | 79152744 | 79152828 | 85     |                                                                      |
| ELTD1        | chr1 | 79355448 | 79472495 | 117048 | EGF, latrophilin and seven transmembrane domain containing 1         |
| LOC101927412 | chr1 | 81001439 | 81112473 | 111035 | uncharacterized LOC101927412                                         |
| LOC101927434 | chr1 | 81979564 | 82023387 | 43824  | uncharacterized LOC101927434                                         |
| LPHN2        | chr1 | 81771844 | 82458422 | 686579 | latrophilin 2                                                        |
| Mir_544      | chr1 | 82312940 | 82313045 | 106    |                                                                      |
| U80773       | chr1 | 83439565 | 83451891 | 12327  |                                                                      |
| LINC01361    | chr1 | 83439565 | 83451891 | 12327  | long intergenic non-protein coding RNA 1361                          |
| BC043544     | chr1 | 83911736 | 83920454 | 8719   |                                                                      |
| LOC101927587 | chr1 | 84041470 | 84326679 | 285210 | uncharacterized LOC101927587                                         |
| BC036594     | chr1 | 84041470 | 84326679 | 285210 |                                                                      |
| HH834010     | chr1 | 84259583 | 84259634 | 52     |                                                                      |
| LOC101927560 | chr1 | 84267198 | 84326229 | 59032  | uncharacterized LOC101927560                                         |
| AK097722     | chr1 | 84267442 | 84326229 | 58788  |                                                                      |
| MIR548AP     | chr1 | 84259597 | 84379059 | 119463 | microRNA 548ap                                                       |
| TTL7         | chr1 | 84335056 | 84464833 | 129778 | tubulin tyrosine ligase-like family, member 7                        |
| BC037304     | chr1 | 84543635 | 84546350 | 2716   |                                                                      |
| PRKACB       | chr1 | 84543657 | 84704181 | 160525 | protein kinase, cAMP-dependent, catalytic, beta                      |
| SNORA2       | chr1 | 84743003 | 84743140 | 138    |                                                                      |
| SAMD13       | chr1 | 84764048 | 84816481 | 52434  | sterile alpha motif domain containing 13                             |
| UOX          | chr1 | 84830640 | 84863576 | 32937  | urate oxidase, pseudogene                                            |
| DNASE2B      | chr1 | 84864214 | 84880691 | 16478  | deoxyribonuclease II beta                                            |
| RPF1         | chr1 | 84944919 | 84964033 | 19115  | ribosome production factor 1 homolog (S. cerevisiae)                 |
| GNG5         | chr1 | 84964005 | 84972262 | 8258   | guanine nucleotide binding protein (G protein), gamma 5              |
| SPATA1       | chr1 | 84972012 | 85018767 | 46756  | spermatogenesis associated 1                                         |
| CTBS         | chr1 | 85018803 | 85040163 | 21361  | chitinase, di-N-acetyl-                                              |
| LINC01461    | chr1 | 85063646 | 85086714 | 23069  | long intergenic non-protein coding RNA 1461                          |
| C1orf180     | chr1 | 85093912 | 85100703 | 6792   | chromosome 1 open reading frame 180                                  |
| SSX2IP       | chr1 | 85109389 | 85156440 | 47052  | synovial sarcoma, X breakpoint 2 interacting protein                 |
| LPAR3        | chr1 | 85279085 | 85358896 | 79812  | lysophosphatidic acid receptor 3                                     |
| MCOLN2       | chr1 | 85391265 | 85462796 | 71532  | muco lipin 2                                                         |
| MCOLN3       | chr1 | 85490240 | 85495642 | 5403   | muco lipin 3                                                         |
| MCOLN3       | chr1 | 85483764 | 85514223 | 30460  | muco lipin 3                                                         |
| WDR63        | chr1 | 85527980 | 85598821 | 70842  | WD repeat domain 63                                                  |
| MIR4423      | chr1 | 85599476 | 85599556 | 81     | microRNA 4423                                                        |
| SYDE2        | chr1 | 85623355 | 85666728 | 43374  | synapse defective 1, Rho GTPase, homolog 2 (C. elegans)              |
| C1orf52      | chr1 | 85715636 | 85725355 | 9720   | chromosome 1 open reading frame 52                                   |
| BCL10        | chr1 | 85731459 | 85742587 | 11129  | B-cell CLL/lymphoma 10                                               |
| LOC646626    | chr1 | 85742040 | 85865646 | 123607 | uncharacterized LOC646626                                            |
| DDAH1        | chr1 | 85784167 | 86044046 | 259880 | dimethylarginine dimethylaminohydrolase 1                            |
| CYR61        | chr1 | 86046443 | 86049648 | 3206   | cysteine-rich, angiogenic inducer, 61                                |
| AL832891     | chr1 | 86047526 | 86049388 | 1863   |                                                                      |
| ZNHIT6       | chr1 | 86115105 | 86174116 | 59012  | zinc finger, HIT-type containing 6                                   |
| COL24A1      | chr1 | 86194915 | 86622446 | 427532 | collagen, type XXIV, alpha 1                                         |
| DR1          | chr1 | 93811477 | 93828148 | 16672  | down-regulator of transcription 1, TBP-binding (negative cofactor 2) |
| FNBP1L       | chr1 | 93913687 | 94020218 | 106532 | formin binding protein 1-like                                        |
| TRNA_Cys     | chr1 | 93981833 | 93981906 | 74     |                                                                      |
| LOC100129046 | chr1 | 94057524 | 94065587 | 8064   | uncharacterized LOC100129046                                         |
| BCAR3        | chr1 | 94027342 | 94312706 | 285365 | breast cancer anti-estrogen resistance 3                             |
| MIG7         | chr1 | 94219111 | 94240930 | 21820  | mig-7                                                                |
| MIR760       | chr1 | 94312387 | 94312467 | 81     | microRNA 760                                                         |
| TRNA_Arg     | chr1 | 94313128 | 94313213 | 86     |                                                                      |
| AX746627     | chr1 | 94317792 | 94319887 | 2096   |                                                                      |
| DNTTIP2      | chr1 | 94335013 | 94344762 | 9750   | deoxynucleotidyltransferase, terminal, interacting protein 2         |
| GCLM         | chr1 | 94352589 | 94375012 | 22424  | glutamate-cysteine ligase, modifier subunit                          |
| ABCA4        | chr1 | 94458393 | 94586705 | 128313 | ATP-binding cassette, sub-family A (ABC1), member 4                  |
| ARHGAP29     | chr1 | 94615402 | 94740624 | 125223 | Rho GTPase activating protein 29                                     |
| ABCD3        | chr1 | 94883932 | 94984219 | 100288 | ATP-binding cassette, sub-family D (ALD), member 3                   |
| F3           | chr1 | 94994731 | 95007413 | 12683  | coagulation factor III (thromboplastin, tissue factor)               |
| BC030750     | chr1 | 95123088 | 95285834 | 162747 |                                                                      |
| LINC01057    | chr1 | 95123088 | 95285837 | 162750 | long intergenic non-protein coding RNA 1057                          |
| SLC44A3      | chr1 | 95285897 | 95360803 | 74907  | solute carrier family 44, member 3                                   |
| CNN3         | chr1 | 95362504 | 95392779 | 30276  | calponin 3, acidic                                                   |
| LOC729970    | chr1 | 95393583 | 95428826 | 35244  | hCG2028352-like                                                      |
| ALG14        | chr1 | 95448278 | 95538507 | 90230  | ALG14, UDP-N-acetylglucosaminyltransferase subunit                   |
| Mir_448      | chr1 | 95550007 | 95550119 | 113    |                                                                      |
| TMEM56       | chr1 | 95558072 | 95663161 | 105090 | transmembrane protein 56                                             |
| TMEM56-RWD   | chr1 | 95583478 | 95710509 | 127032 | TMEM56-RWD3 readthrough                                              |
| LOC101928118 | chr1 | 95628774 | 95699538 | 70765  | uncharacterized LOC101928118                                         |
| AK090700     | chr1 | 95628774 | 95699538 | 70765  |                                                                      |
| RWDD3        | chr1 | 95699710 | 95712781 | 13072  | RWD domain containing 3                                              |
| FLJ31862     | chr1 | 95940292 | 95944912 | 4621   | uncharacterized LOC440594                                            |
| LOC100996635 | chr1 | 95975671 | 95981020 | 5350   | uncharacterized LOC100996635                                         |
| BC067883     | chr1 | 95975895 | 95981020 | 5126   |                                                                      |
| LOC102723661 | chr1 | 96457623 | 96488436 | 30814  | uncharacterized LOC102723661                                         |
| LOC101928241 | chr1 | 96719624 | 96839681 | 120058 | uncharacterized LOC101928241                                         |
| PTBP2        | chr1 | 97187160 | 97280605 | 93446  | polypyrimidine tract binding protein 2                               |
| PTBLP        | chr1 | 97279223 | 97280347 | 1125   | polypyrimidine tract binding protein 2                               |



|              |      |           |           |        |                                                                                        |
|--------------|------|-----------|-----------|--------|----------------------------------------------------------------------------------------|
| DPYD-AS1     | chr1 | 97561478  | 97788511  | 227034 | DPYD antisense RNA 1                                                                   |
| DPYD         | chr1 | 97543299  | 98386615  | 843317 | dihydropyrimidine dehydrogenase                                                        |
| DPYD-AS2     | chr1 | 98262476  | 98263607  | 1132   | DPYD antisense RNA 2                                                                   |
| MIR137HG     | chr1 | 98453555  | 98515249  | 61695  | MIR137 host gene (non-protein coding)                                                  |
| MIR2682      | chr1 | 98510798  | 98510907  | 110    | microRNA 2682                                                                          |
| MIR137       | chr1 | 98511625  | 98511727  | 103    | microRNA 137                                                                           |
| LOC729987    | chr1 | 98676266  | 98738214  | 61949  | uncharacterized LOC729987                                                              |
| SNX7         | chr1 | 99127235  | 99226056  | 98822  | sorting nexin 7                                                                        |
| LPPR5        | chr1 | 99355800  | 99470449  | 114650 | lipid phosphate phosphatase-related protein type 5                                     |
| LOC10012962C | chr1 | 99469831  | 99614408  | 144578 | uncharacterized LOC100129620                                                           |
| LPPR4        | chr1 | 99729847  | 99775138  | 45292  | lipid phosphate phosphatase-related protein type 4                                     |
| LOC10192827C | chr1 | 99937975  | 99999571  | 61597  | uncharacterized LOC101928270                                                           |
| PALMD        | chr1 | 100111430 | 100160097 | 48668  | palmdelphin                                                                            |
| MIR548AA1    | chr1 | 100154610 | 100178513 | 23904  | microRNA 548aa-1                                                                       |
| MIR548D1     | chr1 | 100154610 | 100178513 | 23904  | microRNA 548d-1                                                                        |
| FRRS1        | chr1 | 100174258 | 100231349 | 57092  | ferric-chelate reductase 1                                                             |
| AGL          | chr1 | 100315639 | 100389579 | 73941  | amylase, alpha-1, 6-glucosidase, 4-alpha-glucanotransferase                            |
| BC112312     | chr1 | 100434000 | 100435404 | 1405   |                                                                                        |
| SLC35A3      | chr1 | 100435344 | 100492534 | 57191  | solute carrier family 35 (UDP-N-acetylglucosamine (UDP-GlcNAc) transporter), member A3 |
| HIAT1        | chr1 | 100503788 | 100548929 | 45142  | hippocampus abundant transcript 1                                                      |
| SASS6        | chr1 | 100549101 | 100598511 | 49411  | spindle assembly 6 homolog (C. elegans)                                                |
| TRMT13       | chr1 | 100598705 | 100616054 | 17350  | tRNA methyltransferase 13 homolog (S. cerevisiae)                                      |
| LRR39        | chr1 | 100614003 | 100643829 | 29827  | leucine rich repeat containing 39                                                      |
| DBT          | chr1 | 100652477 | 100715409 | 62933  | dihydroliipoamide branched chain transacylase E2                                       |
| RTCA-AS1     | chr1 | 100730297 | 100731730 | 1434   | RTCA antisense RNA 1                                                                   |
| RTCA         | chr1 | 100731713 | 100758325 | 26613  | RNA 3'-terminal phosphate cyclase                                                      |
| MIR553       | chr1 | 100746796 | 100746864 | 69     | microRNA 553                                                                           |
| CDC14A       | chr1 | 100810583 | 100985833 | 175251 | cell division cycle 14A                                                                |
| GPR88        | chr1 | 101003727 | 101007583 | 3857   | G protein-coupled receptor 88                                                          |
| LINC01349    | chr1 | 101092605 | 101112560 | 19956  | long intergenic non-protein coding RNA 1349                                            |
| LOC100128787 | chr1 | 101092605 | 101112560 | 19956  | long intergenic non-protein coding RNA 1349                                            |
| VCAM1        | chr1 | 101185195 | 101204601 | 19407  | vascular cell adhesion molecule 1                                                      |
| EXTL2        | chr1 | 101337927 | 101360735 | 22809  | exostosin-like glycosyltransferase 2                                                   |
| SLC30A7      | chr1 | 101361631 | 101447311 | 85681  | solute carrier family 30 (zinc transporter), member 7                                  |
| DPH5         | chr1 | 101455179 | 101491644 | 36466  | diphthamide biosynthesis 5                                                             |
| BX538249     | chr1 | 101491408 | 101552819 | 61412  |                                                                                        |
| LOC102606465 | chr1 | 101491401 | 101552935 | 61535  | uncharacterized LOC102606465                                                           |
| BC045807     | chr1 | 101538215 | 101552819 | 14605  |                                                                                        |
| AK021551     | chr1 | 101548009 | 101552819 | 4811   |                                                                                        |
| LOC10192837C | chr1 | 101700428 | 101702084 | 1657   | uncharacterized LOC101928370                                                           |
| S1PR1        | chr1 | 101702304 | 101707076 | 4773   | sphingosine-1-phosphate receptor 1                                                     |
| RNU6-31P     | chr1 | 101806424 | 101806451 | 28     | RNA, U6 small nuclear 31, pseudogene                                                   |
| DNAJA1P5     | chr1 | 102337566 | 102360299 | 22734  | DnaJ (Hsp40) homolog, subfamily A, member 1 pseudogene 5                               |
| OLFM3        | chr1 | 102268122 | 102462790 | 194669 | olfactomedin 3                                                                         |
| COL11A1      | chr1 | 103342022 | 103574052 | 232031 | collagen, type XI, alpha 1                                                             |
| LOC101928436 | chr1 | 103960700 | 104068105 | 107406 | uncharacterized LOC101928436                                                           |
| RNPC3        | chr1 | 104068577 | 104097859 | 29283  | RNA-binding region (RNP1, RRM) containing 3                                            |
| ACTG1P4      | chr1 | 104112025 | 104114008 | 1984   | actin, gamma 1 pseudogene 4                                                            |
| AMY2B        | chr1 | 104078747 | 104153092 | 74346  | amylase, alpha 2B (pancreatic)                                                         |
| AMY2A        | chr1 | 104159998 | 104168400 | 8403   | amylase, alpha 2A (pancreatic)                                                         |
| AMY1A        | chr1 | 104198301 | 104207173 | 8873   | amylase, alpha 1A (salivary)                                                           |
| AMY1B        | chr1 | 104230040 | 104238889 | 8850   | amylase, alpha 1B (salivary)                                                           |
| AMY1A        | chr1 | 104230039 | 104239073 | 9035   | amylase, alpha 1A (salivary)                                                           |
| AMY2A        | chr1 | 104257374 | 104262492 | 5119   | amylase, alpha 2A (pancreatic)                                                         |
| AMY1C        | chr1 | 104292440 | 104301310 | 8871   | amylase, alpha 1C (salivary)                                                           |
| LOC100129138 | chr1 | 104615644 | 104619693 | 4050   | THAP domain containing, apoptosis associated protein 3 pseudogene                      |
| LOC101928476 | chr1 | 106132315 | 106161557 | 29243  | uncharacterized LOC101928476                                                           |
| BC043293     | chr1 | 106144773 | 106161557 | 16785  |                                                                                        |
| PRMT6        | chr1 | 107599266 | 107601916 | 2651   | protein arginine methyltransferase 6                                                   |
| NTNG1        | chr1 | 107682628 | 108024475 | 341848 | netrin G1                                                                              |
| VAV3         | chr1 | 108113781 | 108507545 | 393765 | vav 3 guanine nucleotide exchange factor                                               |
| MIR7852      | chr1 | 108439844 | 108439926 | 83     | microRNA 7852                                                                          |
| VAV3-AS1     | chr1 | 108507064 | 108537229 | 30166  | VAV3 antisense RNA 1                                                                   |
| SLC25A24     | chr1 | 108677343 | 108742980 | 65638  | solute carrier family 25 (mitochondrial carrier; phosphate carrier), member 24         |
| NBPF4        | chr1 | 108765962 | 108786703 | 20742  | neuroblastoma breakpoint family, member 4                                              |
| BC051808     | chr1 | 108803819 | 108816311 | 12493  |                                                                                        |
| NBPF4        | chr1 | 108918459 | 108953434 | 34976  | neuroblastoma breakpoint family, member 4                                              |
| NBPF6        | chr1 | 108992903 | 109013260 | 20358  | neuroblastoma breakpoint family, member 6                                              |
| FAM102B      | chr1 | 109102970 | 109181949 | 78980  | family with sequence similarity 102, member B                                          |
| HENMT1       | chr1 | 109190909 | 109204148 | 13240  | HEN1 methyltransferase homolog 1 (Arabidopsis)                                         |
| PRPF38B      | chr1 | 109234931 | 109244422 | 9492   | pre-mRNA processing factor 38B                                                         |
| FNDC7        | chr1 | 109255555 | 109285367 | 29813  | fibronectin type III domain containing 7                                               |
| STXBP3       | chr1 | 109289284 | 109352148 | 62865  | syntaxin binding protein 3                                                             |
| SPATA42      | chr1 | 109399838 | 109401146 | 1309   | spermatogenesis associated 42 (non-protein coding)                                     |
| AKNAD1       | chr1 | 109358519 | 109506121 | 147603 | AKNA domain containing 1                                                               |
| GPSM2        | chr1 | 109419602 | 109476957 | 57356  | G-protein signaling modulator 2                                                        |
| CLCC1        | chr1 | 109472129 | 109506121 | 33993  | chloride channel CLIC-like 1                                                           |
| WDR47        | chr1 | 109512837 | 109584850 | 72014  | WD repeat domain 47                                                                    |
| TAF13        | chr1 | 109606997 | 109618624 | 11628  | TAF13 RNA polymerase II, TATA box binding protein (TBP)-associated factor, 18kDa       |
| MYBPHL       | chr1 | 109834986 | 109849663 | 14678  | myosin binding protein H-like                                                          |

|              |      |           |           |        |                                                                                          |
|--------------|------|-----------|-----------|--------|------------------------------------------------------------------------------------------|
| SORT1        | chr1 | 109852187 | 109940563 | 88377  | sortilin 1                                                                               |
| PSMA5        | chr1 | 109941652 | 109969108 | 27457  | proteasome (prosome, macropain) subunit, alpha type, 5                                   |
| FW340027     | chr1 | 109965120 | 109966952 | 1833   |                                                                                          |
| SYPL2        | chr1 | 110009099 | 110024764 | 15666  | synaptophysin-like 2                                                                     |
| ATXN7L2      | chr1 | 110026560 | 110035420 | 8861   | ataxin 7-like 2                                                                          |
| CYB561D1     | chr1 | 110036657 | 110043063 | 6407   | cytochrome b561 family, member D1                                                        |
| AMIGO1       | chr1 | 110049445 | 110052336 | 2892   | adhesion molecule with Ig-like domain 1                                                  |
| GPR61        | chr1 | 110082493 | 110088455 | 5963   | G protein-coupled receptor 61                                                            |
| GNAI3        | chr1 | 110091185 | 110138454 | 47270  | guanine nucleotide binding protein (G protein), alpha inhibiting activity polypeptide 3  |
| MIR197       | chr1 | 110141514 | 110141589 | 76     | microRNA 197                                                                             |
| GNAT2        | chr1 | 110145888 | 110155705 | 9818   | guanine nucleotide binding protein (G protein), alpha transducing activity polypeptide 2 |
| AMPD2        | chr1 | 110162125 | 110174677 | 12553  | adenosine monophosphate deaminase 2                                                      |
| GSTM4        | chr1 | 110198697 | 110208123 | 9427   | glutathione S-transferase mu 4                                                           |
| GSTM2        | chr1 | 110198697 | 110226619 | 27923  | glutathione S-transferase mu 2 (muscle)                                                  |
| GSTM1        | chr1 | 110230417 | 110236367 | 5951   | glutathione S-transferase mu 1                                                           |
| GSTM5        | chr1 | 110254863 | 110260890 | 6028   | glutathione S-transferase mu 5                                                           |
| GSTM3        | chr1 | 110276553 | 110283660 | 7108   | glutathione S-transferase mu 3 (brain)                                                   |
| EPS8L3       | chr1 | 110292701 | 110306644 | 13944  | EPS8-like 3                                                                              |
| KCNC4        | chr1 | 110753335 | 110776674 | 23340  | potassium voltage-gated channel, Shaw-related subfamily, member 4                        |
| SNORA25      | chr1 | 110815105 | 110815229 | 125    | small nucleolar RNA, H/ACA box 25                                                        |
| LOC440600    | chr1 | 110828998 | 110881793 | 52796  | uncharacterized LOC440600                                                                |
| RBM15        | chr1 | 110881944 | 110889303 | 7360   | RNA binding motif protein 15                                                             |
| BC069739     | chr1 | 110887099 | 110888734 | 1636   |                                                                                          |
| SLC16A4      | chr1 | 110905472 | 110933704 | 28233  | solute carrier family 16, member 4                                                       |
| LAMTOR5      | chr1 | 110943876 | 110950546 | 6671   | late endosomal/lysosomal adaptor, MAPK and MTOR activator 5                              |
| LAMTOR5-AS1  | chr1 | 110950430 | 110958896 | 8467   | LAMTOR5 antisense RNA 1                                                                  |
| PROK1        | chr1 | 110993787 | 110999976 | 6190   | prokineticin 1                                                                           |
| CYMP         | chr1 | 111016377 | 111033891 | 17515  | chymosin pseudogene                                                                      |
| LOC440602    | chr1 | 111030301 | 111032880 | 2580   | uncharacterized LOC440602                                                                |
| KCNA10       | chr1 | 111059838 | 111061797 | 1960   | potassium voltage-gated channel, shaker-related subfamily, member 10                     |
| KCNA2        | chr1 | 111136201 | 111174096 | 37896  | potassium voltage-gated channel, shaker-related subfamily, member 2                      |
| KCNA3        | chr1 | 111196185 | 111217655 | 21471  | potassium voltage-gated channel, shaker-related subfamily, member 3                      |
| CD53         | chr1 | 111413820 | 111442558 | 28739  | CD53 molecule                                                                            |
| LRIF1        | chr1 | 111489811 | 111506566 | 16756  | ligand dependent nuclear receptor interacting factor 1                                   |
| DRAM2        | chr1 | 111659953 | 111682838 | 22886  | DNA-damage regulated autophagy modulator 2                                               |
| CEPT1        | chr1 | 111682248 | 111727724 | 45477  | choline/ethanolamine phosphotransferase 1                                                |
| DENND2D      | chr1 | 111728590 | 111747160 | 18571  | DENN/MADD domain containing 2D                                                           |
| CHI3L2       | chr1 | 111770280 | 111786062 | 15783  | chitinase 3-like 2                                                                       |
| CHIAP2       | chr1 | 111823145 | 111828730 | 5586   | chitinase, acidic pseudogene 2                                                           |
| CHIA         | chr1 | 111833473 | 111863188 | 29716  | chitinase, acidic                                                                        |
| PIFO         | chr1 | 111889181 | 111895639 | 6459   | primary cilia formation                                                                  |
| PGCP1        | chr1 | 111927140 | 111932473 | 5334   | progastricin (pepsinogen C) pseudogene 1                                                 |
| OVGP1        | chr1 | 111956936 | 111970399 | 13464  | oviductal glycoprotein 1, 120kDa                                                         |
| WDR77        | chr1 | 111982511 | 111991830 | 9320   | WD repeat domain 77                                                                      |
| ATP5F1       | chr1 | 111991461 | 112004525 | 13065  | ATP synthase, H+ transporting, mitochondrial Fo complex, subunit B1                      |
| C1orf162     | chr1 | 112016490 | 112021134 | 4645   | chromosome 1 open reading frame 162                                                      |
| ADORA3       | chr1 | 112025969 | 112106597 | 80629  | adenosine A3 receptor                                                                    |
| LINC01160    | chr1 | 112141628 | 112150940 | 9313   | long intergenic non-protein coding RNA 1160                                              |
| LOC100129269 | chr1 | 112141628 | 112150940 | 9313   | long intergenic non-protein coding RNA 1160                                              |
| RAP1A        | chr1 | 112085054 | 112259317 | 174264 | RAP1A, member of RAS oncogene family                                                     |
| AK023457     | chr1 | 112256829 | 112259310 | 2482   |                                                                                          |
| FAM212B      | chr1 | 112264685 | 112298419 | 33735  | family with sequence similarity 212, member B                                            |
| FAM212B-AS1  | chr1 | 112282462 | 112290420 | 7959   | FAM212B antisense RNA 1                                                                  |
| LOC100506343 | chr1 | 112282462 | 112290420 | 7959   | FAM212B antisense RNA 1                                                                  |
| BC041890     | chr1 | 112287934 | 112298131 | 10198  |                                                                                          |
| LOC101928718 | chr1 | 112287938 | 112298131 | 10194  | uncharacterized LOC101928718                                                             |
| DDX20        | chr1 | 112298189 | 112310199 | 12011  | DEAD (Asp-Glu-Ala-Asp) box polypeptide 20                                                |
| KCND3-IT1    | chr1 | 112396383 | 112399527 | 3145   | KCND3 intronic transcript 1 (non-protein coding)                                         |
| KCND3        | chr1 | 112318453 | 112531777 | 213325 | potassium voltage-gated channel, Shal-related subfamily, member 3                        |
| LOC643355    | chr1 | 112533189 | 112541463 | 8275   | uncharacterized LOC643355                                                                |
| SnoU13       | chr1 | 112913625 | 112913729 | 105    |                                                                                          |
| AX747733     | chr1 | 112938880 | 112941439 | 2560   |                                                                                          |
| CTTNBP2NL    | chr1 | 112938799 | 113003786 | 64988  | CTTNBP2 N-terminal like                                                                  |
| DKFZp547A02c | chr1 | 112999439 | 113006065 | 6627   |                                                                                          |
| MIR4256      | chr1 | 113004391 | 113004455 | 65     | microRNA 4256                                                                            |
| WNT2B        | chr1 | 113009162 | 113063910 | 54749  | wingless-type MMTV integration site family, member 2B                                    |
| ST7L         | chr1 | 113066140 | 113162405 | 96266  | suppression of tumorigenicity 7 like                                                     |
| CAPZA1       | chr1 | 113162074 | 113214241 | 52168  | capping protein (actin filament) muscle Z-line, alpha 1                                  |
| MOV10        | chr1 | 113216933 | 113243368 | 26436  | Mov10 RISC complex RNA helicase                                                          |
| RHOC         | chr1 | 113243748 | 113250025 | 6278   | ras homolog family member C                                                              |
| PPM1J        | chr1 | 113252615 | 113257950 | 5336   | protein phosphatase, Mg2+/Mn2+ dependent, 1J                                             |
| FAM19A3      | chr1 | 113263188 | 113269856 | 6669   | family with sequence similarity 19 (chemokine (C-C motif)-like), member A3               |
| LINC01356    | chr1 | 113362790 | 113393265 | 30476  | long intergenic non-protein coding RNA 1356                                              |
| AX748125     | chr1 | 113362795 | 113393265 | 30471  |                                                                                          |
| HP08777      | chr1 | 113392521 | 113420491 | 27971  |                                                                                          |
| AKR7A2P1     | chr1 | 113465971 | 113467295 | 1325   | aldo-keto reductase family 7, member A2 pseudogene 1                                     |
| SLC16A1      | chr1 | 113454469 | 113498975 | 44507  | solute carrier family 16 (monocarboxylate transporter), member 1                         |
| BC023568     | chr1 | 113499036 | 113506690 | 7655   |                                                                                          |
| SLC16A1-AS1  | chr1 | 113499036 | 113506690 | 7655   | SLC16A1 antisense RNA 1                                                                  |
| BX648855     | chr1 | 113499070 | 113511603 | 12534  |                                                                                          |

|              |      |           |           |        |                                                                                                 |
|--------------|------|-----------|-----------|--------|-------------------------------------------------------------------------------------------------|
| BC047723     | chr1 | 113499036 | 113542118 | 43083  |                                                                                                 |
| BC037540     | chr1 | 113554308 | 113615724 | 61417  |                                                                                                 |
| LOC100996251 | chr1 | 113554308 | 113615724 | 61417  | uncharacterized LOC100996251                                                                    |
| LRIG2        | chr1 | 113615830 | 113667342 | 51513  | leucine-rich repeats and immunoglobulin-like domains 2                                          |
| LOC643441    | chr1 | 113739403 | 113748875 | 9473   | uncharacterized LOC643441                                                                       |
| MAGI3        | chr1 | 113933474 | 114228545 | 295072 | membrane associated guanylate kinase, WW and PDZ domain containing 3                            |
| PHTF1        | chr1 | 114239823 | 114302098 | 62276  | putative homeodomain transcription factor 1                                                     |
| RSBN1        | chr1 | 114304453 | 114355070 | 50618  | round spermatid basic protein 1                                                                 |
| PTPN22       | chr1 | 114356432 | 114414375 | 57944  | protein tyrosine phosphatase, non-receptor type 22 (lymphoid)                                   |
| AP4B1-AS1    | chr1 | 114355233 | 114443859 | 88627  | AP4B1 antisense RNA 1                                                                           |
| BCL2L15      | chr1 | 114419435 | 114430169 | 10735  | BCL2-like 15                                                                                    |
| AP4B1        | chr1 | 114437370 | 114447741 | 10372  | adaptor-related protein complex 4, beta 1 subunit                                               |
| DCLRE1B      | chr1 | 114447914 | 114456708 | 8795   | DNA cross-link repair 1B                                                                        |
| BC048113     | chr1 | 114466622 | 114471854 | 5233   |                                                                                                 |
| BC036361     | chr1 | 114466622 | 114471880 | 5259   |                                                                                                 |
| HIPK1-AS1    | chr1 | 114466622 | 114472147 | 5526   | HIPK1 antisense RNA 1                                                                           |
| HIPK1        | chr1 | 114471995 | 114520491 | 48497  | homeodomain interacting protein kinase 1                                                        |
| OLFML3       | chr1 | 114522012 | 114524876 | 2865   | olfactomedin-like 3                                                                             |
| SYT6         | chr1 | 114631913 | 114696472 | 64560  | synaptotagmin VI                                                                                |
| TRIM33       | chr1 | 114935398 | 115053781 | 118384 | tripartite motif containing 33                                                                  |
| BCAS2        | chr1 | 115110180 | 115124265 | 14086  | breast carcinoma amplified sequence 2                                                           |
| DKFZp686N16  | chr1 | 115125468 | 115126223 | 756    |                                                                                                 |
| DENND2C      | chr1 | 115064016 | 115213044 | 149029 | DENN/MADD domain containing 2C                                                                  |
| AMPD1        | chr1 | 115215719 | 115238239 | 22521  | adenosine monophosphate deaminase 1                                                             |
| NRAS         | chr1 | 115247084 | 115259515 | 12432  | neuroblastoma RAS viral (v-ras) oncogene homolog                                                |
| CSDE1        | chr1 | 115259533 | 115300671 | 41139  | cold shock domain containing E1, RNA-binding                                                    |
| SIKE1        | chr1 | 115312104 | 115323308 | 11205  | suppressor of IKBKE 1                                                                           |
| SYCP1        | chr1 | 115397423 | 115537990 | 140568 | synaptonemal complex protein 1                                                                  |
| HIST2H2BC    | chr1 | 149821758 | 149822340 | 583    | histone cluster 2, H2bc (pseudogene)                                                            |
| HIST2H2AA4   | chr1 | 149822627 | 149823161 | 535    | histone cluster 2, H2aa4                                                                        |
| HIST2H2BE    | chr1 | 149856009 | 149858232 | 2224   | histone cluster 2, H2be                                                                         |
| HIST2H2AC    | chr1 | 149858524 | 149858961 | 438    | histone cluster 2, H2ac                                                                         |
| HIST2H2AB    | chr1 | 149859018 | 149859466 | 449    | histone cluster 2, H2ab                                                                         |
| BOLA1        | chr1 | 149871154 | 149872348 | 1195   | bolA family member 1                                                                            |
| SV2A         | chr1 | 149874871 | 149889434 | 14564  | synaptic vesicle glycoprotein 2A                                                                |
| SF3B4        | chr1 | 149895208 | 149900144 | 4937   | splicing factor 3b, subunit 4, 49kDa                                                            |
| MTMR11       | chr1 | 149900542 | 149908791 | 8250   | myotubularin related protein 11                                                                 |
| OTUD7B       | chr1 | 149912228 | 149982686 | 70459  | OTU deubiquitinase 7B                                                                           |
| TRNA_Ala     | chr1 | 150017381 | 150017452 | 72     |                                                                                                 |
| VPS45        | chr1 | 150039341 | 150117505 | 78165  | vacuolar protein sorting 45 homolog (S. cerevisiae)                                             |
| PLEKHO1      | chr1 | 150121766 | 150131841 | 10076  | pleckstrin homology domain containing, family O member 1                                        |
| ANP32E       | chr1 | 150190716 | 150208504 | 17789  | acidic (leucine-rich) nuclear phosphoprotein 32 family, member E                                |
| CA14         | chr1 | 150230217 | 150237480 | 7264   | carbonic anhydrase XIV                                                                          |
| APH1A        | chr1 | 150237798 | 150241609 | 3812   | APH1A gamma secretase subunit                                                                   |
| C1orf54      | chr1 | 150244686 | 150253335 | 8650   | chromosome 1 open reading frame 54                                                              |
| CIART        | chr1 | 150254942 | 150259504 | 4563   | circadian associated repressor of transcription                                                 |
| C1orf51      | chr1 | 150254952 | 150259501 | 4550   | circadian associated repressor of transcription                                                 |
| MRPS21       | chr1 | 150266261 | 150281414 | 15154  | mitochondrial ribosomal protein S21                                                             |
| PRPF3        | chr1 | 150293927 | 150325704 | 31778  | pre-mRNA processing factor 3                                                                    |
| RPRD2        | chr1 | 150336586 | 150449041 | 112456 | regulation of nuclear pre-mRNA domain containing 2                                              |
| MIR6878      | chr1 | 150464820 | 150464886 | 67     | microRNA 6878                                                                                   |
| TARS2        | chr1 | 150459839 | 150480085 | 20247  | threonyl-tRNA synthetase 2, mitochondrial (putative)                                            |
| ECM1         | chr1 | 150480486 | 150486265 | 5780   | extracellular matrix protein 1                                                                  |
| FALEC        | chr1 | 150488232 | 150490508 | 2277   | focally amplified long non-coding RNA in epithelial cancer                                      |
| LINC00568    | chr1 | 150488232 | 150490508 | 2277   |                                                                                                 |
| MIR4257      | chr1 | 150524404 | 150524490 | 87     | microRNA 4257                                                                                   |
| ADAMTSL4     | chr1 | 150521844 | 150533412 | 11569  | ADAMTSL4-like 4                                                                                 |
| ADAMTSL4-AS  | chr1 | 150533370 | 150547028 | 13659  | ADAMTSL4 antisense RNA 1                                                                        |
| MCL1         | chr1 | 150547026 | 150552214 | 5189   | myeloid cell leukemia 1                                                                         |
| ENSA         | chr1 | 150594598 | 150602098 | 7501   | endosulfine alpha                                                                               |
| GOLPH3L      | chr1 | 150618700 | 150669672 | 50973  | golgi phosphoprotein 3-like                                                                     |
| HORMAD1      | chr1 | 150670534 | 150693364 | 22831  | HORMA domain containing 1                                                                       |
| CTSS         | chr1 | 150702671 | 150738433 | 35763  | cathepsin S                                                                                     |
| CTSK         | chr1 | 150768683 | 150780917 | 12235  | cathepsin K                                                                                     |
| ARNT         | chr1 | 150782180 | 150849244 | 67065  | aryl hydrocarbon receptor nuclear translocator                                                  |
| SETDB1       | chr1 | 150898814 | 150937220 | 38407  | SET domain, bifurcated 1                                                                        |
| CERS2        | chr1 | 150937648 | 150947479 | 9832   | ceramide synthase 2                                                                             |
| ANXA9        | chr1 | 150954498 | 150968114 | 13617  | annexin A9                                                                                      |
| FAM63A       | chr1 | 150969300 | 150980854 | 11555  | family with sequence similarity 63, member A                                                    |
| PRUNE        | chr1 | 150980972 | 151008189 | 27218  | prune exopolyphosphatase                                                                        |
| BNIPL        | chr1 | 151009028 | 151020076 | 11049  | BCL2/adenovirus E1B 19kD interacting protein like                                               |
| C1orf56      | chr1 | 151020186 | 151023871 | 3686   | chromosome 1 open reading frame 56                                                              |
| CDC42SE1     | chr1 | 151023446 | 151032125 | 8680   | CDC42 small effector 1                                                                          |
| MLLT11       | chr1 | 151032150 | 151040973 | 8824   | myeloid/lymphoid or mixed-lineage leukemia (trithorax homolog, Drosophila); translocated to, 11 |
| GABPB2       | chr1 | 151043079 | 151091007 | 47929  | GA binding protein transcription factor, beta subunit 2                                         |
| SEMA6C       | chr1 | 151104162 | 151119140 | 14979  | sema domain, transmembrane domain (TM), and cytoplasmic domain, (semaphorin) 6C                 |
| TNFAIP8L2    | chr1 | 151129104 | 151132225 | 3122   | tumor necrosis factor, alpha-induced protein 8-like 2                                           |
| LYSMD1       | chr1 | 151132223 | 151138424 | 6202   | LysM, putative peptidoglycan-binding, domain containing 1                                       |
| TNFAIP8L2-SC | chr1 | 151129104 | 151142773 | 13670  | TNFAIP8L2-SCNM1 readthrough                                                                     |
| SCNM1        | chr1 | 151138497 | 151142773 | 4277   | sodium channel modifier 1                                                                       |

|              |      |           |           |        |                                                                                           |
|--------------|------|-----------|-----------|--------|-------------------------------------------------------------------------------------------|
| TMOD4        | chr1 | 151142462 | 151148547 | 6086   | tropomodulin 4 (muscle)                                                                   |
| VPS72        | chr1 | 151148775 | 151162689 | 13915  | vacuolar protein sorting 72 homolog (S. cerevisiae)                                       |
| PIP5K1A      | chr1 | 151171020 | 151222007 | 50988  | phosphatidylinositol-4-phosphate 5-kinase, type I, alpha                                  |
| PSMD4        | chr1 | 151227196 | 151239954 | 12759  | proteasome (prosome, macropain) 26S subunit, non-ATPase, 4                                |
| BC021024     | chr1 | 151252499 | 151254405 | 1907   |                                                                                           |
| ZNF687       | chr1 | 151254093 | 151264381 | 10289  | zinc finger protein 687                                                                   |
| HV592965     | chr1 | 151265261 | 151265284 | 24     |                                                                                           |
| HV592900     | chr1 | 151265461 | 151265487 | 27     |                                                                                           |
| HV592953     | chr1 | 151266582 | 151266606 | 25     |                                                                                           |
| HV592909     | chr1 | 151271387 | 151271414 | 28     |                                                                                           |
| HV592934     | chr1 | 151271499 | 151271523 | 25     |                                                                                           |
| HV592964     | chr1 | 151274383 | 151274409 | 27     |                                                                                           |
| HV592982     | chr1 | 151278732 | 151278766 | 35     |                                                                                           |
| PI4KB        | chr1 | 151264272 | 151300191 | 35920  | phosphatidylinositol 4-kinase, catalytic, beta                                            |
| RFX5         | chr1 | 151313115 | 151319769 | 6655   | regulatory factor X, 5 (influences HLA class II expression)                               |
| SELENBP1     | chr1 | 151336777 | 151345210 | 8434   | selenium binding protein 1                                                                |
| PSMB4        | chr1 | 151372040 | 151374412 | 2373   | proteasome (prosome, macropain) subunit, beta type, 4                                     |
| POGZ         | chr1 | 151375199 | 151431941 | 56743  | pogo transposable element with ZNF domain                                                 |
| CGN          | chr1 | 151483861 | 151511167 | 27307  | cingulin                                                                                  |
| MIR554       | chr1 | 151518271 | 151518367 | 97     | microRNA 554                                                                              |
| TUFT1        | chr1 | 151512780 | 151556059 | 43280  | tuftelin 1                                                                                |
| SNX27        | chr1 | 151584540 | 151671559 | 87020  | sorting nexin family member 27                                                            |
| KIAA0488     | chr1 | 151668703 | 151671551 | 2849   | hypothetical protein LOC284484                                                            |
| THEM4        | chr1 | 151843342 | 151882361 | 39020  | thioesterase superfamily member 4                                                         |
| S100A10      | chr1 | 151955385 | 151966714 | 11330  | S100 calcium binding protein A10                                                          |
| AC2          | chr1 | 151967006 | 152015250 | 48245  | adenylate cyclase 2 (brain)                                                               |
| NBPF18P      | chr1 | 151990753 | 151994985 | 4233   | neuroblastoma breakpoint family, member 18 (pseudogene)                                   |
| S100A11      | chr1 | 152004981 | 152009511 | 4531   | S100 calcium binding protein A11                                                          |
| TCHHL1       | chr1 | 152056619 | 152061540 | 4922   | trichohyalin-like 1                                                                       |
| TCHH         | chr1 | 152078792 | 152117706 | 38915  | trichohyalin                                                                              |
| RPTN         | chr1 | 152126070 | 152131704 | 5635   | repetin                                                                                   |
| INTS3        | chr1 | 153700548 | 153746555 | 46008  | integrator complex subunit 3                                                              |
| SLC27A3      | chr1 | 153747767 | 153752633 | 4867   | solute carrier family 27 (fatty acid transporter), member 3                               |
| GATAD2B      | chr1 | 153777202 | 153895451 | 118250 | GATA zinc finger domain containing 2B                                                     |
| DENND4B      | chr1 | 153901976 | 153919154 | 17179  | DENN/MADD domain containing 4B                                                            |
| CRTC2        | chr1 | 153920147 | 153931132 | 10986  | CREB regulated transcription coactivator 2                                                |
| MIR6737      | chr1 | 153934826 | 153934896 | 71     | microRNA 6737                                                                             |
| SLC39A1      | chr1 | 153931574 | 153940660 | 9087   | solute carrier family 39 (zinc transporter), member 1                                     |
| CREB3L4      | chr1 | 153940314 | 153946840 | 6527   | cAMP responsive element binding protein 3-like 4                                          |
| JTB          | chr1 | 153946744 | 153950451 | 3708   | jumping translocation breakpoint                                                          |
| RAB13        | chr1 | 153954092 | 153958853 | 4762   | RAB13, member RAS oncogene family                                                         |
| RPS27        | chr1 | 153963238 | 153964631 | 1394   | ribosomal protein S27                                                                     |
| NUP210L      | chr1 | 153965167 | 154127592 | 162426 | nucleoporin 210kDa-like                                                                   |
| TPM3         | chr1 | 154127779 | 154164611 | 36833  | tropomyosin 3                                                                             |
| MIR190B      | chr1 | 154166140 | 154166219 | 80     | microRNA 190b                                                                             |
| C1orf189     | chr1 | 154171561 | 154178841 | 7281   | chromosome 1 open reading frame 189                                                       |
| C1orf43      | chr1 | 154179176 | 154193273 | 14098  | chromosome 1 open reading frame 43                                                        |
| UBAP2L       | chr1 | 154192647 | 154243986 | 51340  | ubiquitin associated protein 2-like                                                       |
| SNORA58      | chr1 | 154232202 | 154232338 | 137    | small nucleolar RNA, H/ACA box 58                                                         |
| HAX1         | chr1 | 154245038 | 154248355 | 3318   | HCLS1 associated protein X-1                                                              |
| AQP10        | chr1 | 154293591 | 154297801 | 4211   | aquaporin 10                                                                              |
| ATP8B2       | chr1 | 154298035 | 154323780 | 25746  | ATPase, aminophospholipid transporter, class I, type 8B, member 2                         |
| IL6R         | chr1 | 154377668 | 154441926 | 64259  | interleukin 6 receptor                                                                    |
| SHE          | chr1 | 154451953 | 154474526 | 22574  | Src homology 2 domain containing E                                                        |
| TDRD10       | chr1 | 154474694 | 154520623 | 45930  | tudor domain containing 10                                                                |
| UBE2Q1       | chr1 | 154521050 | 154531120 | 10071  | ubiquitin-conjugating enzyme E2Q family member 1                                          |
| UBE2Q1-AS1   | chr1 | 154526084 | 154527504 | 1421   | UBE2Q1 antisense RNA 1                                                                    |
| CHRNA2       | chr1 | 154540256 | 154552353 | 12098  | cholinergic receptor, nicotinic, beta 2 (neuronal)                                        |
| ADAR         | chr1 | 154554533 | 154600456 | 45924  | adenosine deaminase, RNA-specific                                                         |
| KCNN3        | chr1 | 154669941 | 154842754 | 172814 | potassium intermediate/small conductance calcium-activated channel, subfamily N, member 3 |
| SHC1         | chr1 | 154934773 | 154946959 | 12187  | SHC (Src homology 2 domain containing) transforming protein 1                             |
| MIR4258      | chr1 | 154948168 | 154948259 | 92     | microRNA 4258                                                                             |
| CKS1B        | chr1 | 154947117 | 154951725 | 4609   | CDC28 protein kinase regulatory subunit 1B                                                |
| FLAD1        | chr1 | 154955769 | 154965587 | 9819   | flavin adenine dinucleotide synthetase 1                                                  |
| LENEP        | chr1 | 154966061 | 154966791 | 731    | lens epithelial protein                                                                   |
| Mir_324      | chr1 | 154979449 | 154979509 | 61     |                                                                                           |
| ZBTB7B       | chr1 | 154975105 | 154991001 | 15897  | zinc finger and BTB domain containing 7B                                                  |
| DCST2        | chr1 | 154991002 | 155006257 | 15256  | DC-STAMP domain containing 2                                                              |
| DCST1        | chr1 | 155006281 | 155023406 | 17126  | DC-STAMP domain containing 1                                                              |
| LOC100505666 | chr1 | 155017667 | 155036467 | 18801  | uncharacterized LOC100505666                                                              |
| ADAM15       | chr1 | 155023421 | 155035252 | 11832  | ADAM metallopeptidase domain 15                                                           |
| EFNA4        | chr1 | 155036212 | 155042029 | 5818   | ephrin-A4                                                                                 |
| EFNA3        | chr1 | 155036212 | 155060014 | 23803  | ephrin-A3                                                                                 |
| EFNA1        | chr1 | 155100348 | 155107386 | 7039   | ephrin-A1                                                                                 |
| AK308965     | chr1 | 155105263 | 155106131 | 869    |                                                                                           |
| SLC50A1      | chr1 | 155107819 | 155111334 | 3516   | solute carrier family 50 (sugar efflux transporter), member 1                             |
| DPM3         | chr1 | 155112366 | 155112996 | 631    | dolichyl-phosphate mannosyltransferase polypeptide 3                                      |
| KRTCAP2      | chr1 | 155141883 | 155145804 | 3922   | keratinocyte associated protein 2                                                         |
| TRIM46       | chr1 | 155145420 | 155157447 | 12028  | tripartite motif containing 46                                                            |
| AX746485     | chr1 | 155155666 | 155157427 | 1762   |                                                                                           |

|            |      |           |           |        |                                                                                                      |
|------------|------|-----------|-----------|--------|------------------------------------------------------------------------------------------------------|
| MUC1       | chr1 | 155158299 | 155162706 | 4408   | mucin 1, cell surface associated                                                                     |
| FAM189B    | chr1 | 155216995 | 155225274 | 8280   | family with sequence similarity 189, member B                                                        |
| SCAMP3     | chr1 | 155225769 | 155232176 | 6408   | secretory carrier membrane protein 3                                                                 |
| CLK2       | chr1 | 155232658 | 155247501 | 14844  | CDC-like kinase 2                                                                                    |
| HCN3       | chr1 | 155247217 | 155259639 | 12423  | hyperpolarization activated cyclic nucleotide-gated potassium channel 3                              |
| PKLR       | chr1 | 155259083 | 155271225 | 12143  | pyruvate kinase, liver and RBC                                                                       |
| FDPS       | chr1 | 155278538 | 155290457 | 11920  | farnesyl diphosphate synthase                                                                        |
| RUSC1-AS1  | chr1 | 155286653 | 155293938 | 7286   | RUSC1 antisense RNA 1                                                                                |
| RUSC1      | chr1 | 155290639 | 155300909 | 10271  | RUN and SH3 domain containing 1                                                                      |
| MIR555     | chr1 | 155316140 | 155316236 | 97     | microRNA 555                                                                                         |
| POU5F1P4   | chr1 | 155402970 | 155404053 | 1084   | POU domain class 5, transcription factor 1 pseudogene 4                                              |
| ASH1L      | chr1 | 155305051 | 155325585 | 227535 | ash1 (absent, small, or homeotic)-like (Drosophila)                                                  |
| ASH1L-AS1  | chr1 | 155531771 | 155533735 | 1965   | ASH1L antisense RNA 1                                                                                |
| BC017347   | chr1 | 155531863 | 155533735 | 1873   |                                                                                                      |
| MSTO2P     | chr1 | 155579978 | 155584616 | 4639   | misato family member 2, pseudogene                                                                   |
| MSTO1      | chr1 | 155579960 | 155584758 | 4799   | misato 1, mitochondrial distribution and morphology regulator                                        |
| BC041646   | chr1 | 155596545 | 155618335 | 21791  |                                                                                                      |
| DAP3       | chr1 | 155658881 | 155708800 | 49920  | death associated protein 3                                                                           |
| YY1AP1     | chr1 | 155629232 | 155755165 | 125934 | YY1 associated protein 1                                                                             |
| MSTO2P     | chr1 | 155715558 | 155720673 | 5116   | misato family member 2, pseudogene                                                                   |
| GON4L      | chr1 | 155719448 | 155829191 | 109744 | gon-4-like (C. elegans)                                                                              |
| SYT11      | chr1 | 155829259 | 155854990 | 25732  | synaptotagmin XI                                                                                     |
| RIT1       | chr1 | 155867598 | 155881193 | 13596  | Ras-like without CAAX 1                                                                              |
| SNORA42    | chr1 | 155889699 | 155889833 | 135    | small nucleolar RNA, H/ACA box 80E                                                                   |
| SNORA80E   | chr1 | 155889699 | 155889833 | 135    | small nucleolar RNA, H/ACA box 80E                                                                   |
| KIAA0907   | chr1 | 155882835 | 155904188 | 21354  | KIAA0907                                                                                             |
| SCARNA4    | chr1 | 155895748 | 155895877 | 130    | small Cajal body-specific RNA 4                                                                      |
| RXFP4      | chr1 | 155911479 | 155912625 | 1147   | relaxin/insulin-like family peptide receptor 4                                                       |
| MIR6738    | chr1 | 155921063 | 155921127 | 65     | microRNA 6738                                                                                        |
| ARHGEF2    | chr1 | 155916629 | 155959864 | 43236  | Rho/Rac guanine nucleotide exchange factor (GEF) 2                                                   |
| SSR2       | chr1 | 155978838 | 155990758 | 11921  | signal sequence receptor, beta (translocon-associated protein beta)                                  |
| UBQLN4     | chr1 | 156005091 | 156023516 | 18426  | ubiquilin 4                                                                                          |
| LAMTOR2    | chr1 | 156024516 | 156028301 | 3786   | late endosomal/lysosomal adaptor, MAPK and MTOR activator 2                                          |
| RAB25      | chr1 | 156030965 | 156040295 | 9331   | RAB25, member RAS oncogene family                                                                    |
| MEX3A      | chr1 | 156041803 | 156051789 | 9987   | mex-3 RNA binding family member A                                                                    |
| MIR7851    | chr1 | 155996957 | 156132001 | 135045 | microRNA 7851                                                                                        |
| LMNA       | chr1 | 156052336 | 156109880 | 57545  | lamin A/C                                                                                            |
| SEMA4A     | chr1 | 156119734 | 156147542 | 27809  | sema domain, immunoglobulin domain (Ig), transmembrane domain (TM) and short cytoplasmic domain, (s) |
| SLC25A44   | chr1 | 156163722 | 156182587 | 18866  | solute carrier family 25, member 44                                                                  |
| PMF1       | chr1 | 156182778 | 156209868 | 27091  | polyamine-modulated factor 1                                                                         |
| PMF1-BGLAP | chr1 | 156182778 | 156213123 | 30346  | PMF1-BGLAP readthrough                                                                               |
| BGLAP      | chr1 | 156211950 | 156213123 | 1174   | bone gamma-carboxyglutamate (gla) protein                                                            |
| PAQR6      | chr1 | 156213111 | 156217908 | 4798   | progesterin and adipoQ receptor family member VI                                                     |
| SMG5       | chr1 | 156219014 | 156252620 | 33607  | SMG5 nonsense mediated mRNA decay factor                                                             |
| TMEM79     | chr1 | 156252703 | 156262234 | 9532   | transmembrane protein 79                                                                             |
| AF086351   | chr1 | 156259881 | 156262810 | 2930   |                                                                                                      |
| C1orf85    | chr1 | 156262477 | 156265480 | 3004   | chromosome 1 open reading frame 85                                                                   |
| VHLL       | chr1 | 156268414 | 156269428 | 1015   | von Hippel-Lindau tumor suppressor-like                                                              |
| CCT3       | chr1 | 156278751 | 156308206 | 29456  | chaperonin containing TCP1, subunit 3 (gamma)                                                        |
| TSACC      | chr1 | 156307104 | 156316785 | 9682   | TSSK6 activating co-chaperone                                                                        |
| RHBG       | chr1 | 156338979 | 156355013 | 16035  | Rh family, B glycoprotein (gene/pseudogene)                                                          |
| BC016978   | chr1 | 156374048 | 156377645 | 3598   |                                                                                                      |
| C1orf61    | chr1 | 156374054 | 156400493 | 26440  | chromosome 1 open reading frame 61                                                                   |
| MIR9-1     | chr1 | 156390132 | 156390221 | 90     | microRNA 9-1                                                                                         |
| MEF2D      | chr1 | 156433512 | 156470634 | 37123  | myocyte enhancer factor 2D                                                                           |
| IQGAP3     | chr1 | 156495196 | 156542396 | 47201  | IQ motif containing GTPase activating protein 3                                                      |
| TTC24      | chr1 | 156549518 | 156556562 | 7045   | tetratricopeptide repeat domain 24                                                                   |
| APOA1BP    | chr1 | 156561557 | 156566601 | 5045   | apolipoprotein A-I binding protein                                                                   |
| GPATCH4    | chr1 | 156564099 | 156571279 | 7181   | G patch domain containing 4                                                                          |
| HAPLN2     | chr1 | 156589085 | 156595517 | 6433   | hyaluronan and proteoglycan link protein 2                                                           |
| BC005081   | chr1 | 156611456 | 156613427 | 1972   |                                                                                                      |
| BCAN       | chr1 | 156611739 | 156629324 | 17586  | brevican                                                                                             |
| NES        | chr1 | 156638554 | 156647189 | 8636   | nestin                                                                                               |
| CRABP2     | chr1 | 156669399 | 156675608 | 6210   | cellular retinoic acid binding protein 2                                                             |
| ISG20L2    | chr1 | 156692412 | 156698211 | 5800   | interferon stimulated exonuclease gene 20kDa-like 2                                                  |
| RRNAD1     | chr1 | 156698262 | 156706752 | 8491   | ribosomal RNA adenine dimethylase domain containing 1                                                |
| MRPL24     | chr1 | 156707093 | 156710923 | 3831   | mitochondrial ribosomal protein L24                                                                  |
| HDGF       | chr1 | 156711898 | 156736717 | 24820  | hepatoma-derived growth factor                                                                       |
| PRCC       | chr1 | 156737273 | 156770609 | 33337  | papillary renal cell carcinoma (translocation-associated)                                            |
| SH2D2A     | chr1 | 156776034 | 156786640 | 10607  | SH2 domain containing 2A                                                                             |
| NTRK1      | chr1 | 156785541 | 156851642 | 66102  | neurotrophic tyrosine kinase, receptor, type 1                                                       |
| INSRR      | chr1 | 156810664 | 156828712 | 18049  | insulin receptor-related receptor                                                                    |
| PEAR1      | chr1 | 156863522 | 156886226 | 22705  | platelet endothelial aggregation receptor 1                                                          |
| ARHGEF11   | chr1 | 156904631 | 157015162 | 110532 | Rho guanine nucleotide exchange factor (GEF) 11                                                      |
| ETV3L      | chr1 | 157061834 | 157069600 | 7767   | ets variant 3-like                                                                                   |
| CYCSP52    | chr1 | 157098153 | 157098463 | 311    | cytochrome c, somatic pseudogene 52                                                                  |
| ETV3       | chr1 | 157094458 | 157108383 | 13926  | ets variant 3                                                                                        |
| FCRL4      | chr1 | 157543538 | 157567870 | 24333  | Fc receptor-like 4                                                                                   |
| FCRL3      | chr1 | 157646270 | 157670775 | 24506  | Fc receptor-like 3                                                                                   |
| FCRL1      | chr1 | 157764193 | 157789940 | 25748  | Fc receptor-like 1                                                                                   |

|              |      |           |           |        |                                                                                   |
|--------------|------|-----------|-----------|--------|-----------------------------------------------------------------------------------|
| CD5L         | chr1 | 157800703 | 157811634 | 10932  | CD5 molecule-like                                                                 |
| AK057438     | chr1 | 157895763 | 157918861 | 23099  |                                                                                   |
| LOC646268    | chr1 | 158101833 | 158110430 | 8598   | hCG1654703                                                                        |
| CD1D         | chr1 | 158149736 | 158156216 | 6481   | CD1d molecule                                                                     |
| AK097921     | chr1 | 158169170 | 158173667 | 4498   |                                                                                   |
| CD1A         | chr1 | 158223926 | 158228058 | 4133   | CD1a molecule                                                                     |
| CD1C         | chr1 | 158259562 | 158264564 | 5003   | CD1c molecule                                                                     |
| CD1B         | chr1 | 158297739 | 158301321 | 3583   | CD1b molecule                                                                     |
| CD1E         | chr1 | 158323253 | 158327343 | 4091   | CD1e molecule                                                                     |
| OR10T2       | chr1 | 158368311 | 158369256 | 946    | olfactory receptor, family 10, subfamily T, member 2                              |
| OR10K2       | chr1 | 158389717 | 158390656 | 940    | olfactory receptor, family 10, subfamily K, member 2                              |
| OR10K1       | chr1 | 158435351 | 158436293 | 943    | olfactory receptor, family 10, subfamily K, member 1                              |
| OR10R2       | chr1 | 158449667 | 158450675 | 1009   | olfactory receptor, family 10, subfamily R, member 2                              |
| AK057554     | chr1 | 158444244 | 158464676 | 20433  |                                                                                   |
| OR6Y1        | chr1 | 158516917 | 158517895 | 979    | olfactory receptor, family 6, subfamily Y, member 1                               |
| OR6P1        | chr1 | 158532440 | 158533394 | 955    | olfactory receptor, family 6, subfamily P, member 1                               |
| OR10X1       | chr1 | 158548708 | 158549689 | 982    | olfactory receptor, family 10, subfamily X, member 1                              |
| OR10Z1       | chr1 | 158576228 | 158577170 | 943    | olfactory receptor, family 10, subfamily Z, member 1                              |
| SPTA1        | chr1 | 158580495 | 158656506 | 76012  | spectrin, alpha, erythrocytic 1                                                   |
| OR6K2        | chr1 | 158669467 | 158670442 | 976    | olfactory receptor, family 6, subfamily K, member 2                               |
| OR6K3        | chr1 | 158686957 | 158687905 | 949    | olfactory receptor, family 6, subfamily K, member 3                               |
| OR6K6        | chr1 | 158724605 | 158725637 | 1033   | olfactory receptor, family 6, subfamily K, member 6                               |
| MNDA         | chr1 | 158801167 | 158819270 | 18104  | myeloid cell nuclear differentiation antigen                                      |
| PYHIN1       | chr1 | 158901336 | 158946849 | 45514  | pyrin and HIN domain family, member 1                                             |
| IFI16        | chr1 | 158969757 | 159024945 | 55189  | interferon, gamma-inducible protein 16                                            |
| BC038194     | chr1 | 159315958 | 159438858 | 122901 |                                                                                   |
| OR10J1       | chr1 | 159409511 | 159410600 | 1090   | olfactory receptor, family 10, subfamily J, member 1                              |
| OR10J5       | chr1 | 159504867 | 159505797 | 931    | olfactory receptor, family 10, subfamily J, member 5                              |
| APCS         | chr1 | 159557615 | 159558661 | 1047   | amyloid P component, serum                                                        |
| CRP          | chr1 | 159682078 | 159684379 | 2302   | C-reactive protein, pentraxin-related                                             |
| VSIG8        | chr1 | 159824105 | 159832447 | 8343   | V-set and immunoglobulin domain containing 8                                      |
| CCDC19       | chr1 | 159842153 | 159869906 | 27754  | cilia and flagella associated protein 45                                          |
| CFAP45       | chr1 | 159842153 | 159869906 | 27754  | cilia and flagella associated protein 45                                          |
| TAGLN2       | chr1 | 159887896 | 159895332 | 7437   | transgelin 2                                                                      |
| IGSF9        | chr1 | 159896828 | 159915386 | 18559  | immunoglobulin superfamily, member 9                                              |
| SLAMF9       | chr1 | 159921281 | 159924044 | 2764   | SLAM family member 9                                                              |
| LINC01133    | chr1 | 159931013 | 159948876 | 17864  | long intergenic non-protein coding RNA 1133                                       |
| LOC100505633 | chr1 | 159931013 | 159948876 | 17864  | long intergenic non-protein coding RNA 1133                                       |
| PIGM         | chr1 | 159997461 | 160001783 | 4323   | phosphatidylinositol glycan anchor biosynthesis, class M                          |
| KCNJ10       | chr1 | 160007256 | 160040051 | 32796  | potassium inwardly-rectifying channel, subfamily J, member 10                     |
| KCNJ9        | chr1 | 160051359 | 160059212 | 7854   | potassium inwardly-rectifying channel, subfamily J, member 9                      |
| IGSF8        | chr1 | 160061128 | 160068618 | 7491   | immunoglobulin superfamily, member 8                                              |
| ATP1A2       | chr1 | 160085519 | 160113374 | 27856  | ATPase, Na+/K+ transporting, alpha 2 polypeptide                                  |
| ATP1A4       | chr1 | 160121351 | 160156767 | 35417  | ATPase, Na+/K+ transporting, alpha 4 polypeptide                                  |
| CASQ1        | chr1 | 160160284 | 160171676 | 11393  | calsequestrin 1 (fast-twitch, skeletal muscle)                                    |
| AK093299     | chr1 | 160171988 | 160178659 | 6672   |                                                                                   |
| LOC729867    | chr1 | 160171988 | 160178659 | 6672   | uncharacterized LOC729867                                                         |
| PEA15        | chr1 | 160175108 | 160185166 | 10059  | phosphoprotein enriched in astrocytes 15                                          |
| DCAF8        | chr1 | 160185504 | 160254941 | 69438  | DDB1 and CUL4 associated factor 8                                                 |
| PEX19        | chr1 | 160246598 | 160254941 | 8344   | peroxisomal biogenesis factor 19                                                  |
| COPA         | chr1 | 160258376 | 160313354 | 54979  | coatamer protein complex, subunit alpha                                           |
| SUMO1P3      | chr1 | 160287054 | 160288260 | 1207   | SUMO1 pseudogene 3 (functional)                                                   |
| NCSTN        | chr1 | 160313062 | 160328742 | 15681  | nicastrin                                                                         |
| NHLH1        | chr1 | 160336860 | 160342638 | 5779   | nescient helix loop helix 1                                                       |
| VANGL2       | chr1 | 160370230 | 160398468 | 28239  | VANGL planar cell polarity protein 2                                              |
| SLAMF6       | chr1 | 160454819 | 160493052 | 38234  | SLAM family member 6                                                              |
| CD84         | chr1 | 160510883 | 160549306 | 38424  | CD84 molecule                                                                     |
| SLAMF1       | chr1 | 160579608 | 160617101 | 37494  | signaling lymphocytic activation molecule family member 1                         |
| SLAMF7       | chr1 | 160708846 | 160724608 | 15763  | SLAM family member 7                                                              |
| LY9          | chr1 | 160765863 | 160798045 | 32183  | lymphocyte antigen 9                                                              |
| CD244        | chr1 | 160799949 | 160832692 | 32744  | CD244 molecule, natural killer cell receptor 2B4                                  |
| ITLN1        | chr1 | 160846329 | 160854960 | 8632   | intelectin 1 (galactofuranose binding)                                            |
| LOC101928372 | chr1 | 160902254 | 160919712 | 17459  | uncharacterized LOC101928372                                                      |
| ITLN2        | chr1 | 160914815 | 160924589 | 9775   | intelectin 2                                                                      |
| F11R         | chr1 | 160965000 | 161008774 | 43775  | F11 receptor                                                                      |
| TSTD1        | chr1 | 161007421 | 161008774 | 1354   | thiosulfate sulfurtransferase (rhodanese)-like domain containing 1                |
| USF1         | chr1 | 161009040 | 161015769 | 6730   | upstream transcription factor 1                                                   |
| ARHGAP30     | chr1 | 161016731 | 161039760 | 23030  | Rho GTPase activating protein 30                                                  |
| KLHDC9       | chr1 | 161068150 | 161070138 | 1989   | kelch domain containing 9                                                         |
| PFDN2        | chr1 | 161070345 | 161087866 | 17522  | prefoldin subunit 2                                                               |
| NIT1         | chr1 | 161087861 | 161095235 | 7375   | nitrilase 1                                                                       |
| DEDD         | chr1 | 161090768 | 161102478 | 11711  | death effector domain containing                                                  |
| UFC1         | chr1 | 161123533 | 161128646 | 5114   | ubiquitin-fold modifier conjugating enzyme 1                                      |
| USP21        | chr1 | 161129253 | 161135516 | 6264   | ubiquitin-specific protease                                                       |
| PPOX         | chr1 | 161136180 | 161147801 | 11622  | protoporphyrinogen oxidase                                                        |
| B4GALT3      | chr1 | 161141099 | 161147758 | 6660   | UDP-Gal:betaGlcNAc beta 1,4- galactosyltransferase, polypeptide 3                 |
| ADAMTS4      | chr1 | 161159537 | 161168845 | 9309   | ADAM metalloproteinase with thrombospondin type 1 motif, 4                        |
| NDUFS2       | chr1 | 161169104 | 161184184 | 15081  | NADH dehydrogenase (ubiquinone) Fe-S protein 2, 49kDa (NADH-coenzyme Q reductase) |
| FCER1G       | chr1 | 161185086 | 161189038 | 3953   | Fc fragment of IgE, high affinity I, receptor for; gamma polypeptide              |
| APOA2        | chr1 | 161192082 | 161193418 | 1337   | apolipoprotein A-II                                                               |

|              |      |           |           |        |                                                                              |
|--------------|------|-----------|-----------|--------|------------------------------------------------------------------------------|
| MIR5187      | chr1 | 161196975 | 161197051 | 77     | microRNA 5187                                                                |
| NR1I3        | chr1 | 161199455 | 161208000 | 8546   | nuclear receptor subfamily 1, group I, member 3                              |
| TOMM40L      | chr1 | 161195728 | 161213089 | 17362  | translocase of outer mitochondrial membrane 40 homolog (yeast)-like          |
| PCP4L1       | chr1 | 161228516 | 161255240 | 26725  | Purkinje cell protein 4 like 1                                               |
| MPZ          | chr1 | 161274524 | 161279762 | 5239   | myelin protein zero                                                          |
| SDHC         | chr1 | 161284165 | 161334535 | 50371  | succinate dehydrogenase complex, subunit C, integral membrane protein, 15kDa |
| C1orf192     | chr1 | 161334520 | 161337673 | 3154   | chromosome 1 open reading frame 192                                          |
| TRNA_Asp     | chr1 | 161410614 | 161410686 | 73     |                                                                              |
| TRNA_Leu     | chr1 | 161411322 | 161411405 | 84     |                                                                              |
| FCGR2A       | chr1 | 161475204 | 161489360 | 14157  | Fc fragment of IgG, low affinity IIa, receptor (CD32)                        |
| HSPA6        | chr1 | 161494035 | 161496687 | 2653   | heat shock 70kDa protein 6 (HSP70B)                                          |
| TRNA_Leu     | chr1 | 161500131 | 161500214 | 84     |                                                                              |
| TRNA_Asp     | chr1 | 161501914 | 161501986 | 73     |                                                                              |
| FCGR3A       | chr1 | 161511550 | 161520413 | 8864   | Fc fragment of IgG, low affinity IIIa, receptor (CD16a)                      |
| FCGR2C       | chr1 | 161551128 | 161571010 | 19883  | Fc fragment of IgG, low affinity IIc, receptor for (CD32) (gene/pseudogene)  |
| HSPA7        | chr1 | 161575848 | 161578341 | 2494   | heat shock 70kDa protein 7 (HSP70B)                                          |
| FCGR3B       | chr1 | 161592987 | 161601753 | 8767   | Fc fragment of IgG, low affinity IIIB, receptor (CD16b)                      |
| FCGR2B       | chr1 | 161632904 | 161648444 | 15541  | Fc fragment of IgG, low affinity IIb, receptor (CD32)                        |
| RPL31P11     | chr1 | 161653494 | 161655042 | 1549   | ribosomal protein L31 pseudogene 11                                          |
| FCRLA        | chr1 | 161676761 | 161684142 | 7382   | Fc receptor-like A                                                           |
| FCRLB        | chr1 | 161691333 | 161697933 | 6601   | Fc receptor-like B                                                           |
| DUSP12       | chr1 | 161719580 | 161726952 | 7373   | dual specificity phosphatase 12                                              |
| ATF6         | chr1 | 161736033 | 161933860 | 197828 | activating transcription factor 6                                            |
| MIR4654      | chr1 | 162126896 | 162126972 | 77     | microRNA 4654                                                                |
| NOS1AP       | chr1 | 162039580 | 162339813 | 300234 | nitric oxide synthase 1 (neuronal) adaptor protein                           |
| MIR556       | chr1 | 162312335 | 162312430 | 96     | microRNA 556                                                                 |
| C1orf226     | chr1 | 162348695 | 162356608 | 7914   | chromosome 1 open reading frame 226                                          |
| SH2D1B       | chr1 | 162365055 | 162381928 | 16874  | SH2 domain containing 1B                                                     |
| UHMK1        | chr1 | 162466963 | 162499419 | 32457  | U2AF homology motif (UHM) kinase 1                                           |
| UAP1         | chr1 | 162531295 | 162569633 | 38339  | UDP-N-acetylglucosamine pyrophosphorylase 1                                  |
| DDR2         | chr1 | 162602227 | 162750247 | 148021 | discoidin domain receptor tyrosine kinase 2                                  |
| AF268386     | chr1 | 162751900 | 162756362 | 4463   |                                                                              |
| HSD17B7      | chr1 | 162760495 | 162782608 | 22114  | hydroxysteroid (17-beta) dehydrogenase 7                                     |
| C1orf110     | chr1 | 162794247 | 162838605 | 44359  | chromosome 1 open reading frame 110                                          |
| RGS4         | chr1 | 163038395 | 163046592 | 8198   | regulator of G-protein signaling 4                                           |
| LOC101928404 | chr1 | 163131464 | 163182813 | 51350  | uncharacterized LOC101928404                                                 |
| RGS5         | chr1 | 163112088 | 163291581 | 179494 | regulator of G-protein signaling 5                                           |
| NUF2         | chr1 | 163291722 | 163325553 | 33832  | NUF2, NDC80 kinetochore complex component                                    |
| LOC100422212 | chr1 | 163390859 | 163392981 | 2123   | eukaryotic translation initiation factor 3, subunit J pseudogene             |
| AX748175     | chr1 | 164595272 | 164651720 | 56449  |                                                                              |
| PBX1         | chr1 | 164528596 | 164854300 | 325705 | pre-B-cell leukemia homeobox 1                                               |
| LOC100505795 | chr1 | 164738352 | 164743878 | 5527   | uncharacterized LOC100505795                                                 |
| LMX1A        | chr1 | 165171103 | 165325952 | 154850 | LIM homeobox transcription factor 1, alpha                                   |
| RXRG         | chr1 | 165370158 | 165414592 | 44435  | retinoid X receptor, gamma                                                   |
| LOC400794    | chr1 | 165446078 | 165551341 | 105264 | uncharacterized LOC400794                                                    |
| LRRCS52      | chr1 | 165513477 | 165533185 | 19709  | leucine rich repeat containing 52                                            |
| MGST3        | chr1 | 165600109 | 165625372 | 25264  | microsomal glutathione S-transferase 3                                       |
| ALDH9A1      | chr1 | 165631448 | 165667900 | 36453  | aldehyde dehydrogenase 9 family, member A1                                   |
| LOC440700    | chr1 | 165667986 | 165679199 | 11214  | carbonic anhydrase XIV (CA14) pseudogene                                     |
| BC071770     | chr1 | 165738165 | 165744685 | 6521   |                                                                              |
| LOC100147773 | chr1 | 165738165 | 165744685 | 6521   | uncharacterized LOC100147773                                                 |
| TMCO1        | chr1 | 165693527 | 165796992 | 103466 | transmembrane and coiled-coil domains 1                                      |
| FMO9P        | chr1 | 166573152 | 166594473 | 21322  | flavin containing monooxygenase 9 pseudogene                                 |
| POGK         | chr1 | 166808723 | 166823709 | 14987  | pogo transposable element with KRAB domain                                   |
| TADA1        | chr1 | 166825748 | 166845654 | 19907  | transcriptional adaptor 1                                                    |
| ILDR2        | chr1 | 166882440 | 166944561 | 62122  | immunoglobulin-like domain containing receptor 2                             |
| MAEL         | chr1 | 166944818 | 166991449 | 46632  | maelstrom spermatogenic transposon silencer                                  |
| GPA33        | chr1 | 167022081 | 167059868 | 37788  | glycoprotein A33 (transmembrane)                                             |
| DUSP27       | chr1 | 167064086 | 167098402 | 34317  | dual specificity phosphatase 27 (putative)                                   |
| RBSG4        | chr1 | 167144598 | 167165042 | 20445  |                                                                              |
| LINC01363    | chr1 | 167144598 | 167165042 | 20445  | long intergenic non-protein coding RNA 1363                                  |
| POU2F1       | chr1 | 167190065 | 167396582 | 206518 | POU class 2 homeobox 1                                                       |
| CREG1        | chr1 | 167510250 | 167523056 | 12807  | cellular repressor of E1A-stimulated genes 1                                 |
| RCSD1        | chr1 | 167599473 | 167675486 | 76014  | RCSD domain containing 1                                                     |
| TRNA_Pro     | chr1 | 167683961 | 167684033 | 73     |                                                                              |
| TRNA_Pro     | chr1 | 167684724 | 167684796 | 73     |                                                                              |
| MPZL1        | chr1 | 167691186 | 167761156 | 69971  | myelin protein zero-like 1                                                   |
| ADCY10       | chr1 | 167778624 | 167883464 | 104841 | adenylate cyclase 10 (soluble)                                               |
| MPC2         | chr1 | 167885912 | 167906307 | 20396  | mitochondrial pyruvate carrier 2                                             |
| DCAF6        | chr1 | 167905796 | 168045083 | 139288 | DDB1 and CUL4 associated factor 6                                            |
| GPR161       | chr1 | 168048779 | 168106905 | 58127  | G protein-coupled receptor 161                                               |
| TIPRL        | chr1 | 168148082 | 168171351 | 23270  | TOR signaling pathway regulator                                              |
| SFT2D2       | chr1 | 168195254 | 168212088 | 16835  | SFT2 domain containing 2                                                     |
| ANKRD36BP1   | chr1 | 168214818 | 168216668 | 1851   | ankyrin repeat domain 36B pseudogene 1                                       |
| DQ576756     | chr1 | 168218461 | 168220378 | 1918   |                                                                              |
| TBX19        | chr1 | 168195254 | 168283664 | 88411  | T-box 19                                                                     |
| LOC101928565 | chr1 | 168433351 | 168464882 | 31532  | uncharacterized LOC101928565                                                 |
| XCL2         | chr1 | 168510002 | 168513235 | 3234   | chemokine (C motif) ligand 2                                                 |
| XCL1         | chr1 | 168545710 | 168551315 | 5606   | chemokine (C motif) ligand 1                                                 |
| DPT          | chr1 | 168664694 | 168698442 | 33749  | dermatopontin                                                                |

|              |      |           |           |        |                                                                 |
|--------------|------|-----------|-----------|--------|-----------------------------------------------------------------|
| LINC00626    | chr1 | 168756178 | 168762126 | 5949   | long intergenic non-protein coding RNA 626                      |
| LINC00970    | chr1 | 168873142 | 169056243 | 183102 | long intergenic non-protein coding RNA 970                      |
| ATP1B1       | chr1 | 169075946 | 169101960 | 26015  | ATPase, Na+/K+ transporting, beta 1 polypeptide                 |
| NME7         | chr1 | 169101767 | 169337201 | 235435 | NME/NM23 family member 7                                        |
| BLZF1        | chr1 | 169337193 | 169365780 | 28588  | basic leucine zipper nuclear factor 1                           |
| CCDC181      | chr1 | 169364107 | 169429907 | 65801  | coiled-coil domain containing 181                               |
| BC041451     | chr1 | 169411875 | 169429907 | 18033  |                                                                 |
| SLC19A2      | chr1 | 169433148 | 169455208 | 22061  | solute carrier family 19 (thiamine transporter), member 2       |
| F5           | chr1 | 169481191 | 169555769 | 74579  | coagulation factor V (proaccelerin, labile factor)              |
| SELP         | chr1 | 169558087 | 169599377 | 41291  | selectin P (granule membrane protein 140kDa, antigen CD62)      |
| SELL         | chr1 | 169659805 | 169680843 | 21039  | selectin L                                                      |
| SELE         | chr1 | 169691780 | 169703220 | 11441  | selectin E                                                      |
| C1orf112     | chr1 | 169631244 | 169822229 | 190986 | chromosome 1 open reading frame 112                             |
| METTL18      | chr1 | 169761669 | 169764061 | 2393   | methyltransferase like 18                                       |
| SCYL3        | chr1 | 169822214 | 169863100 | 40887  | SCY1-like 3 (S. cerevisiae)                                     |
| KIFAP3       | chr1 | 169890469 | 170043879 | 153411 | kinesin-associated protein 3                                    |
| MIR3119-1    | chr1 | 170120518 | 170120603 | 86     | microRNA 3119-1                                                 |
| MIR3119-2    | chr1 | 170120518 | 170120603 | 86     | microRNA 3119-2                                                 |
| METTL11B     | chr1 | 170115187 | 170136923 | 21737  | methyltransferase like 11B                                      |
| LINC01142    | chr1 | 170240545 | 170253349 | 12805  | long intergenic non-protein coding RNA 1142                     |
| LOC284688    | chr1 | 170240545 | 170253349 | 12805  | long intergenic non-protein coding RNA 1142                     |
| PRRX1        | chr1 | 170633312 | 170708541 | 75230  | paired related homeobox 1                                       |
| MROH9        | chr1 | 170904611 | 171033906 | 129296 | maestro heat-like repeat family member 9                        |
| MIR1295A     | chr1 | 171070868 | 171070947 | 80     | microRNA 1295a                                                  |
| MIR1295B     | chr1 | 171070879 | 171070939 | 61     | microRNA 1295b                                                  |
| FMO3         | chr1 | 171060017 | 171086959 | 26943  | flavin containing monooxygenase 3                               |
| FMO6P        | chr1 | 171106878 | 171130702 | 23825  | flavin containing monooxygenase 6 pseudogene                    |
| FMO2         | chr1 | 171154346 | 171181822 | 27477  | flavin containing monooxygenase 2 (non-functional)              |
| FMO1         | chr1 | 171217609 | 171255117 | 37509  | flavin containing monooxygenase 1                               |
| FMO4         | chr1 | 171283485 | 171311223 | 27739  | flavin containing monooxygenase 4                               |
| TOP1P1       | chr1 | 171308034 | 171310463 | 2430   | topoisomerase (DNA) I pseudogene 1                              |
| PRRC2C       | chr1 | 171454665 | 171562650 | 107986 | proline-rich coiled-coil 2C                                     |
| MYOC         | chr1 | 171604556 | 171621823 | 17268  | myocilin, trabecular meshwork inducible glucocorticoid response |
| VAMP4        | chr1 | 171669295 | 171711379 | 42085  | vesicle-associated membrane protein 4                           |
| METTL13      | chr1 | 171750760 | 171766856 | 16097  | methyltransferase like 13                                       |
| AK094818     | chr1 | 171763732 | 171766852 | 3121   |                                                                 |
| DNM3         | chr1 | 171810617 | 172387567 | 576951 | dynamins 3                                                      |
| MIR3120      | chr1 | 172107947 | 172108028 | 82     | microRNA 3120                                                   |
| MIR214       | chr1 | 172107937 | 172108047 | 111    | microRNA 214                                                    |
| DNM3OS       | chr1 | 172106018 | 172113975 | 7958   | DNM3 opposite strand/antisense RNA                              |
| MIR199A2     | chr1 | 172113674 | 172113784 | 111    | microRNA 199a-2                                                 |
| PIGC         | chr1 | 172362273 | 172413230 | 50958  | phosphatidylinositol glycan anchor biosynthesis, class C        |
| C1orf105     | chr1 | 172389827 | 172437969 | 48143  | chromosome 1 open reading frame 105                             |
| SUCO         | chr1 | 172501488 | 172580975 | 79488  | SUN domain containing ossification factor                       |
| TNFSF18      | chr1 | 173010359 | 173020103 | 9745   | tumor necrosis factor (ligand) superfamily, member 18           |
| TNFSF4       | chr1 | 173152869 | 173176452 | 23584  | tumor necrosis factor (ligand) superfamily, member 4            |
| LOC100506023 | chr1 | 173204198 | 173446294 | 242097 | uncharacterized LOC100506023                                    |
| LOC101928673 | chr1 | 173386927 | 173430501 | 43575  | uncharacterized LOC101928673                                    |
| BC136808     | chr1 | 173387087 | 173430501 | 43415  |                                                                 |
| PRDX6        | chr1 | 173446485 | 173457946 | 11462  | peroxiredoxin 6                                                 |
| SLC9C2       | chr1 | 173469603 | 173572233 | 102631 | solute carrier family 9, member C2 (putative)                   |
| LOC730159    | chr1 | 173604660 | 173606272 | 1613   | uncharacterized LOC730159                                       |
| ANKRD45      | chr1 | 173577474 | 173639001 | 61528  | ankyrin repeat domain 45                                        |
| KLHL20       | chr1 | 173684079 | 173755840 | 71762  | kelch-like family member 20                                     |
| CENPL        | chr1 | 173768687 | 173793777 | 25091  | centromere protein L                                            |
| DARS2        | chr1 | 173793796 | 173827682 | 33887  | aspartyl-tRNA synthetase 2, mitochondrial                       |
| GAS5-AS1     | chr1 | 173832385 | 173833079 | 695    | GAS5 antisense RNA 1                                            |
| SNORD81      | chr1 | 173833312 | 173833355 | 44     | small nucleolar RNA, C/D box 81                                 |
| SNORD47      | chr1 | 173833506 | 173833583 | 78     | small nucleolar RNA, C/D box 47                                 |
| SNORD80      | chr1 | 173833970 | 173834041 | 72     | small nucleolar RNA, C/D box 80                                 |
| SNORD79      | chr1 | 173834487 | 173834568 | 82     | small nucleolar RNA, C/D box 79                                 |
| SNORD78      | chr1 | 173834770 | 173834824 | 55     | small nucleolar RNA, C/D box 78                                 |
| GAS5         | chr1 | 173833038 | 173837125 | 4088   | growth arrest-specific 5 (non-protein coding)                   |
| SNORD44      | chr1 | 173835105 | 173835166 | 62     | small nucleolar RNA, C/D box 44                                 |
| SNORD77      | chr1 | 173835448 | 173835509 | 62     | small nucleolar RNA, C/D box 77                                 |
| SNORD76      | chr1 | 173835772 | 173835853 | 82     | small nucleolar RNA, C/D box 76                                 |
| SNORD75      | chr1 | 173836016 | 173836076 | 61     | small nucleolar RNA, C/D box 75                                 |
| SNORD74      | chr1 | 173836811 | 173836883 | 73     | small nucleolar RNA, C/D box 74                                 |
| ZBTB37       | chr1 | 173837219 | 173855774 | 18556  | zinc finger and BTB domain containing 37                        |
| DQ593451     | chr1 | 173867684 | 173867712 | 29     |                                                                 |
| SERPINC1     | chr1 | 173872941 | 173886516 | 13576  | serpin peptidase inhibitor, clade C (antithrombin), member 1    |
| RC3H1        | chr1 | 173900221 | 173962210 | 61990  | ring finger and CCCH-type domains 1                             |
| LOC102724601 | chr1 | 174090775 | 174128425 | 37651  | uncharacterized LOC102724601                                    |
| GPR52        | chr1 | 174417211 | 174418683 | 1473   | G protein-coupled receptor 52                                   |
| RABGAP1L     | chr1 | 174128551 | 174964445 | 835895 | RAB GTPase activating protein 1-like                            |
| LOC101928696 | chr1 | 174904083 | 174923398 | 19316  | uncharacterized LOC101928696                                    |
| CACYBP       | chr1 | 174968570 | 174981163 | 12594  | calyculin binding protein                                       |
| MRPS14       | chr1 | 174982093 | 174992591 | 10499  | mitochondrial ribosomal protein S14                             |
| TNN          | chr1 | 175036993 | 175117202 | 80210  | tenascin N                                                      |
| TNR          | chr1 | 175291934 | 175712752 | 420819 | tenascin R                                                      |



|              |      |           |           |        |                                                                               |
|--------------|------|-----------|-----------|--------|-------------------------------------------------------------------------------|
| AK093214     | chr1 | 175526123 | 175533005 | 6883   |                                                                               |
| BC043291     | chr1 | 175526123 | 175537388 | 11266  |                                                                               |
| LOC101928751 | chr1 | 175846478 | 175849600 | 3123   | uncharacterized LOC101928751                                                  |
| SCARNA3      | chr1 | 175937532 | 175937676 | 145    | small Cajal body-specific RNA 3                                               |
| RFWD2        | chr1 | 175913961 | 176176380 | 262420 | ring finger and WD repeat domain 2, E3 ubiquitin protein ligase               |
| PAPPA2       | chr1 | 176432306 | 176811970 | 379665 | pappalysin 2                                                                  |
| SEC16B       | chr1 | 177897488 | 178007142 | 109655 | SEC16 homolog B ( <i>S. cerevisiae</i> )                                      |
| LOC730102    | chr1 | 177975274 | 178007142 | 31869  | quinone oxidoreductase-like protein 2 pseudogene                              |
| RASAL2-AS1   | chr1 | 178060642 | 178063128 | 2487   | RASAL2 antisense RNA 1                                                        |
| RASAL2       | chr1 | 178062863 | 178448648 | 385786 | RAS protein activator like 2                                                  |
| TEX35        | chr1 | 178482211 | 178517734 | 35524  | testis expressed 35                                                           |
| C1orf220     | chr1 | 178511930 | 178518024 | 6095   | chromosome 1 open reading frame 220                                           |
| MIR4424      | chr1 | 178646883 | 178646969 | 87     | microRNA 4424                                                                 |
| RALGPS2      | chr1 | 178694281 | 178890977 | 196697 | Ral GEF with PH domain and SH3 binding motif 2                                |
| ANGPTL1      | chr1 | 178818669 | 178840215 | 21547  | angiopoietin-like 1                                                           |
| FAM20B       | chr1 | 178995073 | 179045702 | 50630  | family with sequence similarity 20, member B                                  |
| TOR3A        | chr1 | 179051111 | 179065129 | 14019  | torsin family 3, member A                                                     |
| ABL2         | chr1 | 179068461 | 179198819 | 130359 | ABL proto-oncogene 2, non-receptor tyrosine kinase                            |
| DD413682     | chr1 | 179170962 | 179170982 | 21     |                                                                               |
| SOAT1        | chr1 | 179262848 | 179327814 | 64967  | sterol O-acyltransferase 1                                                    |
| AXDND1       | chr1 | 179334854 | 179523870 | 189017 | axonemal dynein light chain domain containing 1                               |
| TDRD5        | chr1 | 179560747 | 179660407 | 99661  | tudor domain containing 5                                                     |
| FAM163A      | chr1 | 179696914 | 179785333 | 88420  | family with sequence similarity 163, member A                                 |
| TOR1AIP2     | chr1 | 179809101 | 179846941 | 37841  | torsin A interacting protein 2                                                |
| TOR1AIP1     | chr1 | 179851176 | 179889212 | 38037  | torsin A interacting protein 1                                                |
| CEP350       | chr1 | 179923907 | 180084015 | 160109 | centrosomal protein 350kDa                                                    |
| QSOX1        | chr1 | 180123967 | 180167169 | 43203  | quiescin Q6 sulfhydryl oxidase 1                                              |
| AX747393     | chr1 | 180150089 | 180151749 | 1661   |                                                                               |
| FLJ23867     | chr1 | 180167143 | 180169859 | 2717   | uncharacterized protein FLJ23867                                              |
| ACBD6        | chr1 | 180257351 | 180472022 | 214672 | acyl-CoA binding domain containing 6                                          |
| MIR3121      | chr1 | 180407448 | 180407525 | 78     | microRNA 3121                                                                 |
| BC036830     | chr1 | 180528109 | 180535654 | 7546   |                                                                               |
| OVAAL        | chr1 | 180528109 | 180535654 | 7546   | ovarian adenocarcinoma amplified long non-coding RNA                          |
| XPR1         | chr1 | 180601145 | 180859415 | 258271 | xenotropic and polytropic retrovirus receptor 1                               |
| LOC101928973 | chr1 | 181143619 | 181151342 | 7724   | uncharacterized LOC101928973                                                  |
| BC039493     | chr1 | 181143619 | 181151342 | 7724   |                                                                               |
| GM140        | chr1 | 181205523 | 181207740 | 2218   | uncharacterized LOC100287948                                                  |
| AF387615     | chr1 | 181382578 | 181382716 | 139    |                                                                               |
| CACNA1E      | chr1 | 181452685 | 181775921 | 323237 | calcium channel, voltage-dependent, R type, alpha 1E subunit                  |
| ZNF648       | chr1 | 182023704 | 182030847 | 7144   | zinc finger protein 648                                                       |
| LINC01344    | chr1 | 182173079 | 182283196 | 110118 | long intergenic non-protein coding RNA 1344                                   |
| GLUL         | chr1 | 182350838 | 182361341 | 10504  | glutamate-ammonia ligase                                                      |
| JA429801     | chr1 | 182360854 | 182360875 | 22     |                                                                               |
| JA429802     | chr1 | 182360900 | 182360923 | 24     |                                                                               |
| TEDDM1       | chr1 | 182367251 | 182369751 | 2501   | transmembrane epididymal protein 1                                            |
| LINC00272    | chr1 | 182376755 | 182383948 | 7194   | long intergenic non-protein coding RNA 272                                    |
| RGSL1        | chr1 | 182419255 | 182529732 | 110478 | regulator of G-protein signaling like 1                                       |
| RNASEL       | chr1 | 182542768 | 182558394 | 15627  | ribonuclease L (2',5'-oligoadenylate synthetase-dependent)                    |
| RGS16        | chr1 | 182567757 | 182573548 | 5792   | regulator of G-protein signaling 16                                           |
| LOC284648    | chr1 | 182584274 | 182585764 | 1491   | uncharacterized LOC284648                                                     |
| RGS8         | chr1 | 182615791 | 182642067 | 26277  | regulator of G-protein signaling 8                                            |
| NPL          | chr1 | 182758583 | 182799519 | 40937  | N-acetylneuraminidase pyruvate lyase (dihydrodipicolinate synthase)           |
| DHX9         | chr1 | 182808438 | 182857117 | 48680  | DEAH (Asp-Glu-Ala-His) box helicase 9                                         |
| SHCBP1L      | chr1 | 182868999 | 182922553 | 53555  | SHC SH2-domain binding protein 1-like                                         |
| LAMC1        | chr1 | 182992594 | 183114727 | 122134 | laminin, gamma 1 (formerly LAMB2)                                             |
| LAMC2        | chr1 | 183155173 | 183214262 | 59090  | laminin, gamma 2                                                              |
| NMNAT2       | chr1 | 183217371 | 183387634 | 170264 | nicotinamide nucleotide adenylyltransferase 2                                 |
| SMG7-AS1     | chr1 | 183430010 | 183441117 | 11108  | SMG7 antisense RNA 1                                                          |
| SMG7         | chr1 | 183441505 | 183523328 | 81824  | SMG7 nonsense mediated mRNA decay factor                                      |
| APOBEC4      | chr1 | 183615410 | 183622448 | 7039   | apolipoprotein B mRNA editing enzyme, catalytic polypeptide-like 4 (putative) |
| RGL1         | chr1 | 183605181 | 183897685 | 292505 | ral guanine nucleotide dissociation stimulator-like 1                         |
| COLGALT2     | chr1 | 183898795 | 184006878 | 108084 | collagen beta(1-O)galactosyltransferase 2                                     |
| TSEN15       | chr1 | 184020784 | 184043344 | 22561  | TSEN15 tRNA splicing endonuclease subunit                                     |
| C1orf21      | chr1 | 184356149 | 184598155 | 242007 | chromosome 1 open reading frame 21                                            |
| EDEM3        | chr1 | 184659624 | 184724041 | 64418  | ER degradation enhancer, mannosidase alpha-like 3                             |
| FAM129A      | chr1 | 184760158 | 184943718 | 183561 | family with sequence similarity 129, member A                                 |
| RNF2         | chr1 | 185014550 | 185071740 | 57191  | ring finger protein 2                                                         |
| TRMT1L       | chr1 | 185087217 | 185126230 | 39014  | tRNA methyltransferase 1 homolog ( <i>S. cerevisiae</i> )-like                |
| SWT1         | chr1 | 185126191 | 185260913 | 134723 | SWT1 RNA endoribonuclease homolog ( <i>S. cerevisiae</i> )                    |
| JA611272     | chr1 | 185220508 | 185220534 | 27     |                                                                               |
| IVNS1ABP     | chr1 | 185265521 | 185286461 | 20941  | influenza virus NS1A binding protein                                          |
| GS1-279B7.1  | chr1 | 185292978 | 185304171 | 11194  | microtubule-associated protein 1 light chain 3 beta pseudogene                |
| LOC100288079 | chr1 | 185292978 | 185304171 | 11194  | microtubule-associated protein 1 light chain 3 beta pseudogene                |
| AF508906     | chr1 | 185527511 | 185597620 | 70110  |                                                                               |
| LINC01350    | chr1 | 185527511 | 185597620 | 70110  | long intergenic non-protein coding RNA 1350                                   |
| AF508907     | chr1 | 185576315 | 185591914 | 15600  |                                                                               |
| HMCN1        | chr1 | 185703682 | 186160085 | 456404 | hemocentin 1                                                                  |
| MIR548F1     | chr1 | 186029866 | 186446655 | 416790 | microRNA 548f-1                                                               |
| RNU6-72P     | chr1 | 186198963 | 186281028 | 82066  | RNA, U6 small nuclear 72, pseudogene                                          |
| PRG4         | chr1 | 186265404 | 186283688 | 18285  | proteoglycan 4                                                                |

|              |      |           |           |        |                                                                                       |
|--------------|------|-----------|-----------|--------|---------------------------------------------------------------------------------------|
| TPR          | chr1 | 186280785 | 186344864 | 64080  | translocated promoter region, nuclear basket protein                                  |
| C1orf27      | chr1 | 186344889 | 186390503 | 45615  | chromosome 1 open reading frame 27                                                    |
| OCLM         | chr1 | 186369703 | 186370587 | 885    | oculomedin                                                                            |
| PDC          | chr1 | 186412697 | 186430240 | 17544  | phosducin                                                                             |
| LOC102724918 | chr1 | 186404292 | 186439423 | 35132  | uncharacterized LOC102724919                                                          |
| PTGS2        | chr1 | 186640943 | 186649559 | 8617   | prostaglandin-endoperoxide synthase 2 (prostaglandin G/H synthase and cyclooxygenase) |
| PACERR       | chr1 | 186649785 | 186650578 | 794    | PTGS2 antisense NFKB1 complex-mediated expression regulator RNA                       |
| PLA2G4A      | chr1 | 186798031 | 186958113 | 160083 | phospholipase A2, group IVA (cytosolic, calcium-dependent)                            |
| C1orf99      | chr1 | 187610357 | 187612988 | 2632   | endogenous retrovirus group MER61, member 1                                           |
| FAM5C        | chr1 | 190066796 | 190446759 | 379964 |                                                                                       |
| BRINP3       | chr1 | 190066796 | 190446759 | 379964 | bone morphogenetic protein/retinoic acid inducible neural-specific 3                  |
| CR936711     | chr1 | 190447389 | 190450524 | 3136   |                                                                                       |
| LINC01351    | chr1 | 190447389 | 190450524 | 3136   | long intergenic non-protein coding RNA 1351                                           |
| LOC440704    | chr1 | 190594019 | 190770788 | 176770 | uncharacterized LOC440704                                                             |
| RGS18        | chr1 | 192127591 | 192154945 | 27355  | regulator of G-protein signaling 18                                                   |
| RGS21        | chr1 | 192286121 | 192336414 | 50294  | regulator of G-protein signaling 21                                                   |
| RGS1         | chr1 | 192544856 | 192549159 | 4304   | regulator of G-protein signaling 1                                                    |
| RGS13        | chr1 | 192605267 | 192629440 | 24174  | regulator of G-protein signaling 13                                                   |
| RGS2         | chr1 | 192778168 | 192781407 | 3240   | regulator of G-protein signaling 2                                                    |
| LINC01032    | chr1 | 192904873 | 192917387 | 12515  | long intergenic non-protein coding RNA 1032                                           |
| UCHL5        | chr1 | 192981495 | 193029237 | 47743  | ubiquitin carboxyl-terminal hydrolase L5                                              |
| SnoU109      | chr1 | 193026410 | 193026545 | 136    |                                                                                       |
| TROVE2       | chr1 | 193028551 | 193060906 | 32356  | TROVE domain family, member 2                                                         |
| AK022030     | chr1 | 193057300 | 193060904 | 3605   |                                                                                       |
| GLRX2        | chr1 | 193065594 | 193075244 | 9651   | glutaredoxin 2                                                                        |
| MIR1278      | chr1 | 193105632 | 193105713 | 82     | microRNA 1278                                                                         |
| B3GALT2      | chr1 | 193147859 | 193155743 | 7885   | UDP-Gal:betaGlcNAc beta 1,3-galactosyltransferase, polypeptide 2                      |
| CDC73        | chr1 | 193091087 | 193223942 | 132856 | cell division cycle 73                                                                |
| LINC01031    | chr1 | 193273874 | 193335083 | 61210  | long intergenic non-protein coding RNA 1031                                           |
| KCNT2        | chr1 | 196194909 | 196577561 | 382653 | potassium channel, subfamily T, member 2                                              |
| MIR4735      | chr1 | 196551542 | 196551611 | 70     | microRNA 4735                                                                         |
| CFH          | chr1 | 196621007 | 196716634 | 95628  | complement factor H                                                                   |
| CFHR3        | chr1 | 196743929 | 196763203 | 19275  | complement factor H-related 3                                                         |
| CFHR4        | chr1 | 196659181 | 196887843 | 228663 | complement factor H-related 4                                                         |
| CFHR1        | chr1 | 196748291 | 196801319 | 53029  | complement factor H-related 1                                                         |
| CFHR2        | chr1 | 196912933 | 196928356 | 15424  | complement factor H-related 2                                                         |
| CFHR5        | chr1 | 196946666 | 196978803 | 32138  | complement factor H-related 5                                                         |
| F13B         | chr1 | 197008320 | 197036397 | 28078  | coagulation factor XIII, B polypeptide                                                |
| ASPM         | chr1 | 197053256 | 197115824 | 62569  | asp (abnormal spindle) homolog, microcephaly associated (Drosophila)                  |
| ZBTB41       | chr1 | 197122813 | 197169672 | 46860  | zinc finger and BTB domain containing 41                                              |
| CRB1         | chr1 | 197170591 | 197447585 | 276995 | crumbs family member 1, photoreceptor morphogenesis associated                        |
| DENND1B      | chr1 | 197473878 | 197744623 | 270746 | DENN/MADD domain containing 1B                                                        |
| C1orf53      | chr1 | 197871681 | 197876497 | 4817   | chromosome 1 open reading frame 53                                                    |
| LHX9         | chr1 | 197881634 | 197901715 | 20082  | LIM homeobox 9                                                                        |
| NEK7         | chr1 | 198126107 | 198291548 | 165442 | NIMA-related kinase 7                                                                 |
| ATP6V1G3     | chr1 | 198492351 | 198510075 | 17725  | ATPase, H+ transporting, lysosomal 13kDa, V1 subunit G3                               |
| PTPRC        | chr1 | 198608097 | 198726605 | 118509 | protein tyrosine phosphatase, receptor type, C                                        |
| MIR181B1     | chr1 | 198828001 | 198828111 | 111    | microRNA 181b-1                                                                       |
| MIR181A1     | chr1 | 198828172 | 198828282 | 111    | microRNA 181a-1                                                                       |
| MIR181A1HG   | chr1 | 198777131 | 198906558 | 129428 | MIR181A1 host gene (non-protein coding)                                               |
| LINC01222    | chr1 | 198961717 | 198988093 | 26377  | long intergenic non-protein coding RNA 1222                                           |
| BC040869     | chr1 | 198975168 | 198990166 | 14999  |                                                                                       |
| NR5A2        | chr1 | 199996729 | 200146550 | 149822 | nuclear receptor subfamily 5, group A, member 2                                       |
| LINC00862    | chr1 | 200311671 | 200342920 | 31250  | long intergenic non-protein coding RNA 862                                            |
| ZNF281       | chr1 | 200374074 | 200379186 | 5113   | zinc finger protein 281                                                               |
| EU250746     | chr1 | 200380927 | 200444641 | 63715  |                                                                                       |
| KIF14        | chr1 | 200520624 | 200589862 | 69239  | kinesin family member 14                                                              |
| DDX59        | chr1 | 200610118 | 200639126 | 29009  | DEAD (Asp-Glu-Ala-Asp) box polypeptide 59                                             |
| LOC101929224 | chr1 | 200638634 | 200663378 | 24745  | uncharacterized LOC101929224                                                          |
| CAMSAP2      | chr1 | 200708685 | 200829835 | 121151 | calmodulin regulated spectrin-associated protein family, member 2                     |
| GPR25        | chr1 | 200842082 | 200843306 | 1225   | G protein-coupled receptor 25                                                         |
| C1orf106     | chr1 | 200860626 | 200884864 | 24239  | chromosome 1 open reading frame 106                                                   |
| C1orf81      | chr1 | 200898071 | 200935796 | 37726  | chromosome 1 open reading frame 81                                                    |
| KIF21B       | chr1 | 200938513 | 200992828 | 54316  | kinesin family member 21B                                                             |
| BC016656     | chr1 | 200993076 | 200997920 | 4845   |                                                                                       |
| CACNA1S      | chr1 | 201008639 | 201081694 | 73056  | calcium channel, voltage-dependent, L type, alpha 1S subunit                          |
| LAD1         | chr1 | 201349965 | 201368669 | 18705  | ladinin 1                                                                             |
| TNNI1        | chr1 | 201372894 | 201398994 | 26101  | troponin I type 1 (skeletal, slow)                                                    |
| PHLDA3       | chr1 | 201434606 | 201438299 | 3694   | pleckstrin homology-like domain, family A, member 3                                   |
| MIR5191      | chr1 | 201688635 | 201688755 | 121    | microRNA 5191                                                                         |
| NAV1         | chr1 | 201617449 | 201796102 | 178654 | neuron navigator 1                                                                    |
| IPO9-AS1     | chr1 | 201657383 | 201798687 | 141305 | IPO9 antisense RNA 1                                                                  |
| RNU6-79P     | chr1 | 201736888 | 201767778 | 30891  | RNA, U6 small nuclear 79, pseudogene                                                  |
| MIR1231      | chr1 | 201777738 | 201777830 | 93     | microRNA 1231                                                                         |
| IPO9         | chr1 | 201798287 | 201853422 | 55136  | importin 9                                                                            |
| MIR6739      | chr1 | 201832500 | 201832575 | 76     | microRNA 6739                                                                         |
| SHISA4       | chr1 | 201857796 | 201861715 | 3920   | shisa family member 4                                                                 |
| LMOD1        | chr1 | 201865583 | 201915716 | 50134  | leiomodulin 1 (smooth muscle)                                                         |
| TIMM17A      | chr1 | 201924618 | 201939789 | 15172  | translocase of inner mitochondrial membrane 17 homolog A (yeast)                      |
| RNPEP        | chr1 | 201951765 | 201975275 | 23511  | arginyl aminopeptidase (aminopeptidase B)                                             |

|           |      |           |           |        |                                                                                                           |
|-----------|------|-----------|-----------|--------|-----------------------------------------------------------------------------------------------------------|
| MIR6740   | chr1 | 201972251 | 201972364 | 114    | microRNA 6740                                                                                             |
| ELF3      | chr1 | 201977072 | 201986315 | 9244   | E74-like factor 3 (ets domain transcription factor, epithelial-specific )                                 |
| GPR37L1   | chr1 | 202092028 | 202098634 | 6607   | G-protein coupled receptor 37 like 1                                                                      |
| ARL8A     | chr1 | 202102531 | 202113871 | 11341  | ADP-ribosylation factor-like 8A                                                                           |
| PTPN7     | chr1 | 202116140 | 202130716 | 14577  | protein tyrosine phosphatase, non-receptor type 7                                                         |
| UBE2T     | chr1 | 202300784 | 202311094 | 10311  | ubiquitin-conjugating enzyme E2T (putative)                                                               |
| PPP1R12B  | chr1 | 202317829 | 202557697 | 239869 | protein phosphatase 1, regulatory subunit 12B                                                             |
| SYT2      | chr1 | 202559724 | 202679551 | 119828 | synaptotagmin II                                                                                          |
| KDM5B     | chr1 | 202696531 | 202777549 | 81019  | lysine (K)-specific demethylase 5B                                                                        |
| PCAT6     | chr1 | 202780073 | 202781041 | 969    | prostate cancer associated transcript 6 (non-protein coding)                                              |
| KDM5B-AS1 | chr1 | 202780073 | 202781041 | 969    | prostate cancer associated transcript 6 (non-protein coding)                                              |
| MGAT4EP   | chr1 | 202789384 | 202796341 | 6958   | MGAT4 family, member E, pseudogene                                                                        |
| LOC641515 | chr1 | 202789393 | 202796341 | 6949   | MGAT4 family, member E, pseudogene                                                                        |
| BC040684  | chr1 | 202819223 | 202830736 | 11514  |                                                                                                           |
| BC049825  | chr1 | 202827080 | 202830736 | 3657   |                                                                                                           |
| LOC148709 | chr1 | 202830881 | 202844369 | 13489  | actin pseudogene                                                                                          |
| RABIF     | chr1 | 202847409 | 202858385 | 10977  | RAB interacting factor                                                                                    |
| KLHL12    | chr1 | 202860229 | 202897727 | 37499  | kelch-like family member 12                                                                               |
| ADIPOR1   | chr1 | 202909952 | 202927700 | 17749  | adiponectin receptor 1                                                                                    |
| PPFIA4    | chr1 | 203003611 | 203047864 | 44254  | protein tyrosine phosphatase, receptor type, f polypeptide (PTPRF), interacting protein (liprin), alpha 4 |
| MYOG      | chr1 | 203052256 | 203055166 | 2911   | myogenin (myogenic factor 4)                                                                              |
| ADORA1    | chr1 | 203096835 | 203136533 | 39699  | adenosine A1 receptor                                                                                     |
| MYBPH     | chr1 | 203136938 | 203144942 | 8005   | myosin binding protein H                                                                                  |
| BC034684  | chr1 | 203148063 | 203148611 | 549    |                                                                                                           |
| CHI3L1    | chr1 | 203148058 | 203155922 | 7865   | chitinase 3-like 1 (cartilage glycoprotein-39)                                                            |
| CHIT1     | chr1 | 203181958 | 203241937 | 59980  | chitinase 1 (chitotriosidase)                                                                             |
| LINC01353 | chr1 | 203256279 | 203257924 | 1646   | long intergenic non-protein coding RNA 1353                                                               |
| LINC01136 | chr1 | 203267885 | 203274453 | 6569   | long intergenic non-protein coding RNA 1136                                                               |
| LOC730227 | chr1 | 203267885 | 203274453 | 6569   | long intergenic non-protein coding RNA 1136                                                               |
| BTG2      | chr1 | 203274663 | 203278729 | 4067   | BTG family, member 2                                                                                      |
| FMOD      | chr1 | 203309748 | 203320557 | 10810  | fibromodulin                                                                                              |
| ATP2B4    | chr1 | 203595914 | 203713209 | 117296 | ATPase, Ca <sup>++</sup> transporting, plasma membrane 4                                                  |
| U42379    | chr1 | 203696679 | 203696730 | 52     |                                                                                                           |
| SNORA77   | chr1 | 203698708 | 203698833 | 126    | small nucleolar RNA, H/ACA box 77                                                                         |
| LINC00260 | chr1 | 203699704 | 203700979 | 1276   | long intergenic non-protein coding RNA 260                                                                |
| LAX1      | chr1 | 203734283 | 203745480 | 11198  | lymphocyte transmembrane adaptor 1                                                                        |
| ZBED6     | chr1 | 203766650 | 203769590 | 2941   | zinc finger, BED-type containing 6                                                                        |
| ZC3H11A   | chr1 | 203764750 | 203823256 | 58507  | zinc finger CCCH-type containing 11A                                                                      |
| SNRPE     | chr1 | 203830726 | 203840280 | 9555   | small nuclear ribonucleoprotein polypeptide E                                                             |
| LINC00303 | chr1 | 204001574 | 204010392 | 8819   | long intergenic non-protein coding RNA 303                                                                |
| SOX13     | chr1 | 204042245 | 204096871 | 54627  | SRY (sex determining region Y)-box 13                                                                     |
| ETNK2     | chr1 | 204100188 | 204121310 | 21123  | ethanolamine kinase 2                                                                                     |
| PLEKHA6   | chr1 | 204218311 | 204226997 | 8687   | pleckstrin homology domain containing, family A member 6                                                  |
| PLEKHA6   | chr1 | 204187978 | 204329057 | 141080 | pleckstrin homology domain containing, family A member 6                                                  |
| PIK3C2B   | chr1 | 204391757 | 204463852 | 72096  | phosphatidylinositol-4-phosphate 3-kinase, catalytic subunit type 2 beta                                  |
| TRNA_Lys  | chr1 | 204475654 | 204475727 | 74     |                                                                                                           |
| MDM4      | chr1 | 204485506 | 204677661 | 192156 | MDM4, p53 regulator                                                                                       |
| AK097184  | chr1 | 204595902 | 204598840 | 2939   |                                                                                                           |
| LRRN2     | chr1 | 204586302 | 204654597 | 68296  | leucine rich repeat neuronal 2                                                                            |
| NFASC     | chr1 | 204797781 | 204991950 | 194170 | neurofascin                                                                                               |
| AX746920  | chr1 | 204989426 | 204991950 | 2525   |                                                                                                           |
| RBBP5     | chr1 | 205055269 | 205091150 | 35882  | retinoblastoma binding protein 5                                                                          |
| DSTYK     | chr1 | 205111630 | 205180727 | 69098  | dual serine/threonine and tyrosine protein kinase                                                         |
| TMCC2     | chr1 | 205197037 | 205242471 | 45435  | transmembrane and coiled-coil domain family 2                                                             |
| NUAK2     | chr1 | 205271190 | 205290883 | 19694  | NUAK family, SNF1-like kinase, 2                                                                          |
| KLHDC8A   | chr1 | 205305192 | 205326218 | 21027  | kelch domain containing 8A                                                                                |
| LEMD1-AS1 | chr1 | 205342379 | 205356568 | 14190  | LEMD1 antisense RNA 1                                                                                     |
| LEMD1     | chr1 | 205350505 | 205391214 | 40710  | LEM domain containing 1                                                                                   |
| BLACAT1   | chr1 | 205404013 | 205425214 | 21202  | bladder cancer associated transcript 1 (non-protein coding)                                               |
| MIR135B   | chr1 | 205417429 | 205417526 | 98     | microRNA 135b                                                                                             |
| AK095633  | chr1 | 205425185 | 205438152 | 12968  |                                                                                                           |
| CDK18     | chr1 | 205473683 | 205501921 | 28239  | cyclin-dependent kinase 18                                                                                |
| LOC284578 | chr1 | 205523400 | 205525763 | 2364   | uncharacterized LOC284578                                                                                 |
| MFSD4     | chr1 | 205538111 | 205572046 | 33936  | major facilitator superfamily domain containing 4                                                         |
| ELK4      | chr1 | 205566694 | 205649630 | 82937  | ELK4, ETS-domain protein (SRF accessory protein 1)                                                        |
| SLC45A3   | chr1 | 205592803 | 205649630 | 56828  | solute carrier family 45, member 3                                                                        |
| NUCKS1    | chr1 | 205681946 | 205719372 | 37427  | nuclear casein kinase and cyclin-dependent kinase substrate 1                                             |
| RAB7L1    | chr1 | 205737113 | 205744610 | 7498   |                                                                                                           |
| RAB29     | chr1 | 205737113 | 205744610 | 7498   | RAB29, member RAS oncogene family                                                                         |
| IL10      | chr1 | 206940947 | 206946034 | 5088   | interleukin 10                                                                                            |
| IL19      | chr1 | 206972214 | 207016326 | 44113  | interleukin 19                                                                                            |
| C1orf116  | chr1 | 207191865 | 207206101 | 14237  | chromosome 1 open reading frame 116                                                                       |
| YOD1      | chr1 | 207217193 | 207226325 | 9133   | YOD1 deubiquitinase                                                                                       |
| PFKFB2    | chr1 | 207207760 | 207254368 | 46609  | 6-phosphofructo-2-kinase/fructose-2,6-biphosphatase 2                                                     |
| C4BPB     | chr1 | 207262211 | 207273337 | 11127  | complement component 4 binding protein, beta                                                              |
| AX229788  | chr1 | 207277510 | 207277617 | 108    |                                                                                                           |
| C4BPA     | chr1 | 207277606 | 207318317 | 40712  | complement component 4 binding protein, alpha                                                             |
| CD55      | chr1 | 207494816 | 207534311 | 39496  | CD55 molecule, decay accelerating factor for complement (Cromer blood group)                              |
| CR2       | chr1 | 207627644 | 207663240 | 35597  | complement component (3d/Epstein Barr virus) receptor 2                                                   |
| CR1       | chr1 | 207669472 | 207815110 | 145639 | complement component (3b/4b) receptor 1 (Knops blood group)                                               |

|              |      |           |           |        |                                                                      |
|--------------|------|-----------|-----------|--------|----------------------------------------------------------------------|
| CR1L         | chr1 | 207818457 | 207898053 | 79597  | complement component (3b/4b) receptor 1-like                         |
| CD46         | chr1 | 207925382 | 207968861 | 43480  | CD46 molecule, complement regulatory protein                         |
| MIR29C       | chr1 | 207975196 | 207975868 | 673    | microRNA 29c                                                         |
| MIR29B2      | chr1 | 207975787 | 207975868 | 82     | microRNA 29b-2                                                       |
| mir-29b-2    | chr1 | 207974866 | 207996048 | 21183  |                                                                      |
| LOC148696    | chr1 | 207991723 | 207995941 | 4219   | uncharacterized LOC148696                                            |
| AK123177     | chr1 | 208039465 | 208042417 | 2953   |                                                                      |
| CD34         | chr1 | 208059882 | 208084683 | 24802  | CD34 molecule                                                        |
| PLXNA2       | chr1 | 208195587 | 208417665 | 222079 | plexin A2                                                            |
| MIR205HG     | chr1 | 209602167 | 209605892 | 3726   | MIR205 host gene (non-protein coding)                                |
| MIR205       | chr1 | 209605477 | 209605587 | 111    | microRNA 205                                                         |
| CAMK1G       | chr1 | 209757044 | 209787284 | 30241  | calcium/calmodulin-dependent protein kinase IG                       |
| MIR4260      | chr1 | 209796788 | 209796855 | 68     | microRNA 4260                                                        |
| LAMB3        | chr1 | 209788217 | 209825820 | 37604  | laminin, beta 3                                                      |
| G0S2         | chr1 | 209848669 | 209849735 | 1067   | G0/G1 switch 2                                                       |
| HSD11B1      | chr1 | 209859524 | 209908295 | 48772  | hydroxysteroid (11-beta) dehydrogenase 1                             |
| DIEXF        | chr1 | 210001311 | 210030910 | 29600  | digestive organ expansion factor homolog (zebrafish)                 |
| SYT14        | chr1 | 210111518 | 210337633 | 226116 | synaptotagmin XIV                                                    |
| SERTAD4-AS1  | chr1 | 210404803 | 210407466 | 2664   | SERTAD4 antisense RNA 1                                              |
| SERTAD4      | chr1 | 210406194 | 210416440 | 10247  | SERTA domain containing 4                                            |
| HHAT         | chr1 | 210501595 | 210849638 | 348044 | hedgehog acyltransferase                                             |
| KCNH1        | chr1 | 210851656 | 211307457 | 455802 | potassium voltage-gated channel, subfamily H (eag-related), member 1 |
| RCOR3        | chr1 | 211432707 | 211489725 | 57019  | REST corepressor 3                                                   |
| TRAF5        | chr1 | 211499956 | 211548286 | 48331  | TNF receptor-associated factor 5                                     |
| LINC00467    | chr1 | 211556096 | 211605877 | 49782  | long intergenic non-protein coding RNA 467                           |
| RD3          | chr1 | 211649863 | 211666259 | 16397  | retinal degeneration 3                                               |
| SLC30A1      | chr1 | 211748380 | 211752099 | 3720   | solute carrier family 30 (zinc transporter), member 1                |
| NEK2         | chr1 | 211831598 | 211848972 | 17375  | NIMA-related kinase 2                                                |
| LPGAT1       | chr1 | 211916798 | 212004114 | 87317  | lysophosphatidylglycerol acyltransferase 1                           |
| INTS7        | chr1 | 212113740 | 212209002 | 95263  | integrator complex subunit 7                                         |
| DTL          | chr1 | 212208894 | 212278348 | 69455  | denticleless E3 ubiquitin protein ligase homolog (Drosophila)        |
| MIR3122      | chr1 | 212250954 | 212251027 | 74     | microRNA 3122                                                        |
| BC010168     | chr1 | 212317864 | 212318301 | 438    |                                                                      |
| LOC101929541 | chr1 | 212386343 | 212458363 | 72021  | uncharacterized LOC101929541                                         |
| PPP2R5A      | chr1 | 212458878 | 212535205 | 76328  | protein phosphatase 2, regulatory subunit B', alpha                  |
| SNORA16B     | chr1 | 212526159 | 212526292 | 134    | small nucleolar RNA, H/ACA box 16B                                   |
| TMEM206      | chr1 | 212537815 | 212588267 | 50453  | transmembrane protein 206                                            |
| NENF         | chr1 | 212606228 | 212619721 | 13494  | neudessin neurotrophic factor                                        |
| LOC101929565 | chr1 | 212719035 | 212729408 | 10374  | uncharacterized LOC101929565                                         |
| ATF3         | chr1 | 212738675 | 212794119 | 55445  | activating transcription factor 3                                    |
| FAM71A       | chr1 | 212797625 | 212800120 | 2496   | family with sequence similarity 71, member A                         |
| BATF3        | chr1 | 212859758 | 212873327 | 13570  | basic leucine zipper transcription factor, ATF-like 3                |
| NSL1         | chr1 | 212899494 | 212965139 | 65646  | NSL1, MIS12 kinetochore complex component                            |
| TATDN3       | chr1 | 212965169 | 212990167 | 24999  | TatD DNase domain containing 3                                       |
| SPATA45      | chr1 | 213003484 | 213020991 | 17508  | spermatogenesis associated 45                                        |
| C1orf227     | chr1 | 213003484 | 213020991 | 17508  | spermatogenesis associated 45                                        |
| FLVCR1-AS1   | chr1 | 213029945 | 213031480 | 1536   | FLVCR1 antisense RNA 1 (head to head)                                |
| FLVCR1       | chr1 | 213031596 | 213072705 | 41110  | feline leukemia virus subgroup C cellular receptor 1                 |
| VASH2        | chr1 | 213123861 | 213164927 | 41067  | vasohibin 2                                                          |
| ANGEL2       | chr1 | 213165523 | 213189217 | 23695  | angel homolog 2 (Drosophila)                                         |
| RPS6KC1      | chr1 | 213224574 | 213446808 | 222235 | ribosomal protein S6 kinase, 52kDa, polypeptide 1                    |
| AK092251     | chr1 | 213992977 | 214139607 | 146631 |                                                                      |
| LINC00538    | chr1 | 214098091 | 214099996 | 1906   | long intergenic non-protein coding RNA 538                           |
| PROX1        | chr1 | 214161277 | 214214847 | 53571  | prospero homeobox 1                                                  |
| SMYD2        | chr1 | 214454564 | 214510477 | 55914  | SET and MYND domain containing 2                                     |
| PTPN14       | chr1 | 214522038 | 214725024 | 202987 | protein tyrosine phosphatase, non-receptor type 14                   |
| BC171896     | chr1 | 214655881 | 214656819 | 939    |                                                                      |
| CENPF        | chr1 | 214776531 | 214837914 | 61384  | centromere protein F, 350/400kDa                                     |
| KCNK2        | chr1 | 215178884 | 215410436 | 231553 | potassium channel, subfamily K, member 2                             |
| KCTD3        | chr1 | 215740734 | 215795149 | 54416  | potassium channel tetramerization domain containing 3                |
| USH2A        | chr1 | 215796235 | 216596738 | 800504 | Usher syndrome 2A (autosomal recessive, mild)                        |
| LOC102723833 | chr1 | 216245806 | 216260259 | 14454  | uncharacterized LOC102723833                                         |
| Mir_598      | chr1 | 216825011 | 216825068 | 58     |                                                                      |
| ESRRG        | chr1 | 216676587 | 217311097 | 634511 | estrogen-related receptor gamma                                      |
| GPATCH2      | chr1 | 217600334 | 217804444 | 204111 | G patch domain containing 2                                          |
| SPATA17      | chr1 | 217804694 | 218040484 | 235791 | spermatogenesis associated 17                                        |
| SPATA17-AS1  | chr1 | 217954539 | 217958462 | 3924   | SPATA17 antisense RNA 1                                              |
| LOC101929631 | chr1 | 218216846 | 218232482 | 15637  | uncharacterized LOC101929631                                         |
| RRP15        | chr1 | 218458628 | 218511325 | 52698  | ribosomal RNA processing 15 homolog (S. cerevisiae)                  |
| LOC728463    | chr1 | 218517537 | 218519020 | 1484   | TGFB2 antisense RNA 1 (head to head)                                 |
| TGFB2-AS1    | chr1 | 218517537 | 218519020 | 1484   | TGFB2 antisense RNA 1 (head to head)                                 |
| TGFB2        | chr1 | 218518675 | 218617961 | 99287  | transforming growth factor, beta 2                                   |
| TGFB2-OT1    | chr1 | 218615967 | 218617337 | 1371   | TGFB2 overlapping transcript 1                                       |
| LYPLAL1-AS1  | chr1 | 219254316 | 219347130 | 92815  | LYPLAL1 antisense RNA 1 (head to head)                               |
| LOC643723    | chr1 | 219254316 | 219347130 | 92815  | LYPLAL1 antisense RNA 1 (head to head)                               |
| LYPLAL1      | chr1 | 219347172 | 219386207 | 39036  | lysophospholipase-like 1                                             |
| SLC30A10     | chr1 | 219858768 | 220131989 | 273222 | solute carrier family 30, member 10                                  |
| RNU5F-1      | chr1 | 220046618 | 220292777 | 246160 | RNA, U5F small nuclear 1                                             |
| EPRS         | chr1 | 220141941 | 220220000 | 78060  | glutamyl-prolyl-tRNA synthetase                                      |
| BPNT1        | chr1 | 220230823 | 220263195 | 32373  | 3'(2'), 5'-bisphosphate nucleotidase 1                               |

|              |      |           |           |        |                                                                              |
|--------------|------|-----------|-----------|--------|------------------------------------------------------------------------------|
| MIR215       | chr1 | 220291194 | 220291304 | 111    | microRNA 215                                                                 |
| MIR194-1     | chr1 | 220291498 | 220291583 | 86     | microRNA 194-1                                                               |
| DM119532     | chr1 | 220291547 | 220291569 | 23     |                                                                              |
| IARS2        | chr1 | 220267454 | 220321383 | 53930  | isoleucyl-tRNA synthetase 2, mitochondrial                                   |
| MIR664A      | chr1 | 220373883 | 220373961 | 79     | microRNA 664a                                                                |
| SNORA36B     | chr1 | 220373887 | 220374018 | 132    | small nucleolar RNA, H/ACA box 36B                                           |
| RAB3GAP2     | chr1 | 220321609 | 220445843 | 124235 | RAB3 GTPase activating protein subunit 2 (non-catalytic)                     |
| AURKAPS1     | chr1 | 220439520 | 220441057 | 1538   | aurora kinase A pseudogene 1                                                 |
| MARK1        | chr1 | 220701524 | 220837799 | 136276 | MAP/microtubule affinity-regulating kinase 1                                 |
| DUSP10       | chr1 | 221874761 | 221915518 | 40758  | dual specificity phosphatase 10                                              |
| LOC101929771 | chr1 | 222001007 | 222014008 | 13002  | uncharacterized LOC101929771                                                 |
| TRNA_Thr     | chr1 | 222638346 | 222638419 | 74     |                                                                              |
| DQ587965     | chr1 | 222646009 | 222646043 | 35     |                                                                              |
| DQ573170     | chr1 | 222646722 | 222646767 | 46     |                                                                              |
| DQ576410     | chr1 | 222646839 | 222646870 | 32     |                                                                              |
| DQ584993     | chr1 | 222647751 | 222647786 | 36     |                                                                              |
| DQ584971     | chr1 | 222648391 | 222648423 | 33     |                                                                              |
| DQ575983     | chr1 | 222648536 | 222648596 | 61     |                                                                              |
| DQ597892     | chr1 | 222648680 | 222648717 | 38     |                                                                              |
| DQ574659     | chr1 | 222649002 | 222649064 | 63     |                                                                              |
| DQ584609     | chr1 | 222649161 | 222649251 | 91     |                                                                              |
| DQ600234     | chr1 | 222650319 | 222650381 | 63     |                                                                              |
| HHIPL2       | chr1 | 222695601 | 222721444 | 25844  | HHIP-like 2                                                                  |
| TAF1A        | chr1 | 222731243 | 222763275 | 32033  | TATA box binding protein (TBP)-associated factor, RNA polymerase I, A, 48kDa |
| TAF1A-AS1    | chr1 | 222763261 | 222765975 | 2715   | TAF1A antisense RNA 1                                                        |
| MIA3         | chr1 | 222791443 | 222841354 | 49912  | melanoma inhibitory activity family, member 3                                |
| AIDA         | chr1 | 222841354 | 222886526 | 45173  | axin interactor, dorsalization associated                                    |
| BROX         | chr1 | 222885894 | 222908538 | 22645  | BRO1 domain and CAAX motif containing                                        |
| AK025140     | chr1 | 222906202 | 222908533 | 2332   |                                                                              |
| FAM177B      | chr1 | 222910557 | 222924002 | 13446  | family with sequence similarity 177, member B                                |
| AK094916     | chr1 | 222900275 | 222946483 | 46209  |                                                                              |
| DISP1        | chr1 | 222988430 | 223179337 | 190908 | dispatched homolog 1 (Drosophila)                                            |
| TLR5         | chr1 | 223282747 | 223316624 | 33878  | toll-like receptor 5                                                         |
| SUSD4        | chr1 | 223394160 | 223537544 | 143385 | sushi domain containing 4                                                    |
| C1orf65      | chr1 | 223566714 | 223568812 | 2099   | coiled-coil domain containing 185                                            |
| CCDC185      | chr1 | 223566714 | 223568812 | 2099   | coiled-coil domain containing 185                                            |
| CAPN8        | chr1 | 223714971 | 223853436 | 138466 | calpain 8                                                                    |
| CAPN2        | chr1 | 223889294 | 223963720 | 74427  | calpain 2, (mII) large subunit                                               |
| TP53BP2      | chr1 | 223967594 | 224033674 | 66081  | tumor protein p53 binding protein 2                                          |
| HM358976     | chr1 | 224051997 | 224052306 | 310    |                                                                              |
| AK124970     | chr1 | 224189608 | 224197818 | 8211   |                                                                              |
| FBXO28       | chr1 | 224301788 | 224349749 | 47962  | F-box protein 28                                                             |
| DEGS1        | chr1 | 224370909 | 224381142 | 10234  | delta(4)-desaturase, sphingolipid 1                                          |
| LOC101927143 | chr1 | 224396449 | 224400981 | 4533   | uncharacterized LOC101927143                                                 |
| LOC101927164 | chr1 | 224407314 | 224415745 | 8432   | uncharacterized LOC101927164                                                 |
| MIR320B2     | chr1 | 224444705 | 224444843 | 139    | microRNA 320b-2                                                              |
| NVL          | chr1 | 224415035 | 224517891 | 102857 | nuclear VCP-like                                                             |
| CNIH4        | chr1 | 224544512 | 224567153 | 22642  | cornichon family AMPA receptor auxiliary protein 4                           |
| MIR4742      | chr1 | 224585928 | 224586013 | 86     | microRNA 4742                                                                |
| DL490795     | chr1 | 224586541 | 224586601 | 61     |                                                                              |
| WDR26        | chr1 | 224572844 | 224622001 | 49158  | WD repeat domain 26                                                          |
| AB586698     | chr1 | 224605809 | 224606083 | 275    |                                                                              |
| CNIH3        | chr1 | 224804178 | 224928249 | 124072 | cornichon family AMPA receptor auxiliary protein 3                           |
| DNAH14       | chr1 | 225117355 | 225586996 | 469642 | dynein, axonemal, heavy chain 14                                             |
| LBR          | chr1 | 225589203 | 225616557 | 27355  | lamin B receptor                                                             |
| ENAH         | chr1 | 225674533 | 225840845 | 166313 | enabled homolog (Drosophila)                                                 |
| AK124056     | chr1 | 225888305 | 225939945 | 51641  |                                                                              |
| SRP9         | chr1 | 225965514 | 225978168 | 12655  | signal recognition particle 9kDa                                             |
| EPHX1        | chr1 | 225997775 | 226033262 | 35488  | epoxide hydrolase 1, microsomal (xenobiotic)                                 |
| LEFTY1       | chr1 | 226073981 | 226112040 | 38060  | left-right determination factor 1                                            |
| PYCR2        | chr1 | 226107576 | 226112040 | 4465   | pyrroline-5-carboxylate reductase family, member 2                           |
| MIR6741      | chr1 | 226109779 | 226109842 | 64     | microRNA 6741                                                                |
| LEFTY2       | chr1 | 226124297 | 226129083 | 4787   | left-right determination factor 2                                            |
| SDE2         | chr1 | 226170402 | 226187066 | 16665  | SDE2 telomere maintenance homolog (S. pombe)                                 |
| H3F3A        | chr1 | 226250407 | 226259703 | 9297   | H3 histone, family 3A                                                        |
| H3F3AP4      | chr1 | 226250427 | 226259703 | 9277   | H3 histone, family 3A, pseudogene 4                                          |
| BC032899     | chr1 | 226271655 | 226277994 | 6340   |                                                                              |
| ACBD3        | chr1 | 226332379 | 226374423 | 42045  | acyl-CoA binding domain containing 3                                         |
| BC033346     | chr1 | 226374532 | 226385086 | 10555  |                                                                              |
| MIXL1        | chr1 | 226411318 | 226414756 | 3439   | Mix paired-like homeobox                                                     |
| LIN9         | chr1 | 226418849 | 226497449 | 78601  | lin-9 DREAM MuvB core complex component                                      |
| PARP1        | chr1 | 226548391 | 226595801 | 47411  | poly (ADP-ribose) polymerase 1                                               |
| AK055856     | chr1 | 226723318 | 226730469 | 7152   |                                                                              |
| C1orf95      | chr1 | 226736500 | 226796915 | 60416  | chromosome 1 open reading frame 95                                           |
| ITPKB        | chr1 | 226819390 | 226926876 | 107487 | inositol-trisphosphate 3-kinase B                                            |
| PSEN2        | chr1 | 227058272 | 227083804 | 25533  | presenilin 2                                                                 |
| CABC1        | chr1 | 227084588 | 227091365 | 6778   | chaperone, ABC1 activity of bc1 complex like (S. pombe)                      |
| ADCK3        | chr1 | 227084588 | 227175246 | 90659  | aarF domain containing kinase 3                                              |
| CDC42BPA     | chr1 | 227177565 | 227505826 | 328262 | CDC42 binding protein kinase alpha (DMPK-like)                               |
| DTNB         | chr2 | 25600066  | 25896516  | 296451 | dystrobrevin, beta                                                           |

|              |      |           |           |         |                                                                                                          |
|--------------|------|-----------|-----------|---------|----------------------------------------------------------------------------------------------------------|
| Y_RNA        | chr2 | 25919944  | 25920057  | 114     |                                                                                                          |
| ASXL2        | chr2 | 25962252  | 26101312  | 139061  | additional sex combs like transcriptional regulator 2                                                    |
| KIF3C        | chr2 | 26149454  | 26205443  | 55990   | kinesin family member 3C                                                                                 |
| GAREML       | chr2 | 26395959  | 26412532  | 16574   | GRB2 associated, regulator of MAPK1-like                                                                 |
| HADHA        | chr2 | 26413503  | 26467594  | 54092   | hydroxyacyl-CoA dehydrogenase/3-ketoacyl-CoA thiolase/enoyl-CoA hydratase (trifunctional protein), alpha |
| HADHB        | chr2 | 26467615  | 26513333  | 45719   | hydroxyacyl-CoA dehydrogenase/3-ketoacyl-CoA thiolase/enoyl-CoA hydratase (trifunctional protein), beta  |
| GPR113       | chr2 | 26531040  | 26569685  | 38646   | G protein-coupled receptor 113                                                                           |
| EMILIN1      | chr2 | 27301434  | 27309265  | 7832    | elastin microfibril interfacier 1                                                                        |
| KHK          | chr2 | 27309610  | 27323619  | 14010   | ketohexokinase (fructokinase)                                                                            |
| CGREF1       | chr2 | 27322220  | 27341995  | 19776   | cell growth regulator with EF hand domain 1                                                              |
| AK074615     | chr2 | 27346722  | 27349815  | 3094    |                                                                                                          |
| ABHD1        | chr2 | 27346656  | 27353680  | 7025    | abhydrolase domain containing 1                                                                          |
| PREB         | chr2 | 27353624  | 27357542  | 3919    | prolactin regulatory element binding                                                                     |
| PRR30        | chr2 | 27359714  | 27362332  | 2619    | proline rich 30                                                                                          |
| C2orf53      | chr2 | 27359714  | 27362332  | 2619    | proline rich 30                                                                                          |
| TCF23        | chr2 | 27371944  | 27375819  | 3876    | transcription factor 23                                                                                  |
| SLC5A6       | chr2 | 27422454  | 27435175  | 12722   | solute carrier family 5 (sodium/multivitamin and iodide cotransporter), member 6                         |
| LRP1B        | chr2 | 140988995 | 142889270 | 1900276 | low density lipoprotein receptor-related protein 1B                                                      |
| NAALADL2     | chr3 | 174156362 | 174455536 | 299175  | N-acetylated alpha-linked acidic dipeptidase-like 2                                                      |
| LGSN         | chr6 | 63985855  | 64029882  | 44028   | lensin, lens protein with glutamine synthetase domain                                                    |
| PTP4A1       | chr6 | 64231650  | 64293493  | 61844   | protein tyrosine phosphatase type IVA, member 1                                                          |
| PHF3         | chr6 | 64345706  | 64425418  | 79713   | PHD finger protein 3                                                                                     |
| EYS          | chr6 | 64429875  | 66417118  | 1987244 | eyes shut homolog (Drosophila)                                                                           |
| LMBRD1       | chr6 | 70385640  | 70507049  | 121410  | LMBR1 domain containing 1                                                                                |
| COL19A1      | chr6 | 70576447  | 70922157  | 345711  | collagen, type XIX, alpha 1                                                                              |
| COL9A1       | chr6 | 70925742  | 71012786  | 87045   | collagen, type IX, alpha 1                                                                               |
| LOC101928353 | chr6 | 71103904  | 71109120  | 5217    | uncharacterized LOC101928353                                                                             |
| FAM135A      | chr6 | 71123106  | 71270877  | 147772  | family with sequence similarity 135, member A                                                            |
| C6orf57      | chr6 | 71276624  | 71298606  | 21983   | chromosome 6 open reading frame 57                                                                       |
| SMAP1        | chr6 | 71377473  | 71571716  | 194244  | small ArfGAP 1                                                                                           |
| B3GAT2       | chr6 | 71571068  | 71666788  | 95721   | beta-1,3-glucuronyltransferase 2                                                                         |
| U3           | chr6 | 71836595  | 71836808  | 214     | RNA, U3 small nucleolar                                                                                  |
| OGFRL1       | chr6 | 71998476  | 72011973  | 13498   | opioid growth factor receptor-like 1                                                                     |
| MIR30C2      | chr6 | 72086662  | 72086734  | 73      | microRNA 30c-2                                                                                           |
| DM119538     | chr6 | 72113256  | 72113278  | 23      |                                                                                                          |
| MIR30A       | chr6 | 72113253  | 72113324  | 72      | microRNA 30a                                                                                             |
| DM119539     | chr6 | 72113297  | 72113319  | 23      |                                                                                                          |
| LINC00472    | chr6 | 72117566  | 72130448  | 12883   | long intergenic non-protein coding RNA 472                                                               |
| LOC10272400C | chr6 | 72130729  | 72168575  | 37847   | uncharacterized LOC102724000                                                                             |
| RIMS1        | chr6 | 72596405  | 73112845  | 516441  | regulating synaptic membrane exocytosis 1                                                                |
| KCNQ5-IT1    | chr6 | 73340222  | 73388282  | 48061   | KCNQ5 intronic transcript 1 (non-protein coding)                                                         |
| KCNQ5        | chr6 | 73331570  | 73908573  | 577004  | potassium voltage-gated channel, KQT-like subfamily, member 5                                            |
| MIR4282      | chr6 | 73677409  | 73677476  | 68      | microRNA 4282                                                                                            |
| KCNQ5-AS1    | chr6 | 73844525  | 73853237  | 8713    | KCNQ5 antisense RNA 1                                                                                    |
| KHDC1L       | chr6 | 73933267  | 73935175  | 1909    | KH homology domain containing 1-like                                                                     |
| KHDC1        | chr6 | 73919470  | 74019938  | 100469  | KH homology domain containing 1                                                                          |
| BC031876     | chr6 | 73972949  | 73986225  | 13277   |                                                                                                          |
| AL832252     | chr6 | 73977773  | 74001061  | 23289   |                                                                                                          |
| C6orf147     | chr6 | 73983861  | 74020088  | 36228   | chromosome 6 open reading frame 147                                                                      |
| DPPA5        | chr6 | 74062784  | 74063999  | 1216    | developmental pluripotency associated 5                                                                  |
| KHDC3L       | chr6 | 74072399  | 74073898  | 1500    | KH domain containing 3-like, subcortical maternal complex member                                         |
| OOEP         | chr6 | 74078279  | 74104816  | 26538   | oocyte expressed protein                                                                                 |
| DDX43        | chr6 | 74104284  | 74127289  | 23006   | DEAD (Asp-Glu-Ala-Asp) box polypeptide 43                                                                |
| MB21D1       | chr6 | 74134855  | 74162043  | 27189   | Mab-21 domain containing 1                                                                               |
| MTO1         | chr6 | 74189658  | 74190528  | 871     | mitochondrial tRNA translation optimization 1                                                            |
| MTO1         | chr6 | 74171453  | 74211179  | 39727   | mitochondrial tRNA translation optimization 1                                                            |
| EEF1A1       | chr6 | 74225472  | 74230755  | 5284    | eukaryotic translation elongation factor 1 alpha 1                                                       |
| DL491467     | chr6 | 74228125  | 74228181  | 57      |                                                                                                          |
| DQ590492     | chr6 | 74228271  | 74228299  | 29      |                                                                                                          |
| SLC17A5      | chr6 | 74303101  | 74363737  | 60637   | solute carrier family 17 (acidic sugar transporter), member 5                                            |
| AK124950     | chr6 | 74403625  | 74405743  | 2119    |                                                                                                          |
| LOC101928489 | chr6 | 74403625  | 74405854  | 2230    | uncharacterized LOC101928489                                                                             |
| CD109        | chr6 | 74405807  | 74538041  | 132235  | CD109 molecule                                                                                           |
| LOC101928516 | chr6 | 74779166  | 75400443  | 621278  | uncharacterized LOC101928516                                                                             |
| AF086303     | chr6 | 74779166  | 75400443  | 621278  |                                                                                                          |
| COL12A1      | chr6 | 75794041  | 75915623  | 121583  | collagen, type XII, alpha 1                                                                              |
| COX7A2       | chr6 | 75947390  | 75953644  | 6255    | cytochrome c oxidase subunit VIIa polypeptide 2 (liver)                                                  |
| TMEM30A      | chr6 | 75962637  | 75994632  | 31996   | transmembrane protein 30A                                                                                |
| LOC100506804 | chr6 | 75994729  | 76001580  | 6852    | uncharacterized LOC100506804                                                                             |
| FILIP1       | chr6 | 76004606  | 76203545  | 198940  | filamin A interacting protein 1                                                                          |
| LOC10192854C | chr6 | 76092901  | 76168615  | 75715   | uncharacterized LOC101928540                                                                             |
| SENPE6       | chr6 | 76311621  | 76427994  | 116374  | SUMO1/sentrin specific peptidase 6                                                                       |
| MYO6         | chr6 | 76458892  | 76629254  | 170363  | myosin VI                                                                                                |
| IMPG1        | chr6 | 76630830  | 76782395  | 151566  | interphotoreceptor matrix proteoglycan 1                                                                 |
| HTR1B        | chr6 | 78171947  | 78173120  | 1174    | 5-hydroxytryptamine (serotonin) receptor 1B, G protein-coupled                                           |
| MEI4         | chr6 | 78400372  | 78634476  | 234105  | meiosis-specific 4 homolog (S. cerevisiae)                                                               |
| IRAK1BP1     | chr6 | 79577260  | 79656157  | 78898   | interleukin-1 receptor-associated kinase 1 binding protein 1                                             |
| PHIP         | chr6 | 79644135  | 79788011  | 143877  | pleckstrin homology domain interacting protein                                                           |
| HMGN3        | chr6 | 79910961  | 79944455  | 33495   | high mobility group nucleosomal binding domain 3                                                         |
| HMGN3-AS1    | chr6 | 79943390  | 79946517  | 3128    | HMGN3 antisense RNA 1                                                                                    |

|              |      |          |          |        |                                                                     |
|--------------|------|----------|----------|--------|---------------------------------------------------------------------|
| LOC100288198 | chr6 | 79943390 | 79946517 | 3128   | HMG3 antisense RNA 1                                                |
| BC070061     | chr6 | 80017385 | 80023101 | 5717   |                                                                     |
| LCA5         | chr6 | 80194707 | 80247147 | 52441  | Leber congenital amaurosis 5                                        |
| DQ582269     | chr6 | 80248450 | 80248479 | 30     |                                                                     |
| SH3BGR2      | chr6 | 80340999 | 80413369 | 72371  | SH3 domain binding glutamate-rich protein like 2                    |
| RNY4         | chr6 | 80451635 | 80451669 | 35     | RNA, Ro-associated Y4                                               |
| C6orf7       | chr6 | 80513303 | 80580137 | 66835  | chromosome 6 open reading frame 7                                   |
| ELOVL4       | chr6 | 80624528 | 80657315 | 32788  | ELOVL fatty acid elongase 4                                         |
| TTK          | chr6 | 80714321 | 80752244 | 37924  | TTK protein kinase                                                  |
| BCKDHB       | chr6 | 80816343 | 81055987 | 239645 | branched chain keto acid dehydrogenase E1, beta polypeptide         |
| FAM46A       | chr6 | 82455446 | 82462428 | 6983   | family with sequence similarity 46, member A                        |
| BC038576     | chr6 | 82523002 | 82523909 | 908    |                                                                     |
| IBTK         | chr6 | 82879703 | 82957471 | 77769  | inhibitor of Bruton agammaglobulinemia tyrosine kinase              |
| TPBG         | chr6 | 83072922 | 83077133 | 4212   | trophoblast glycoprotein                                            |
| UBE3D        | chr6 | 83602185 | 83775545 | 173361 | ubiquitin protein ligase E3D                                        |
| DOPEY1       | chr6 | 83777384 | 83881065 | 103682 | dopey family member 1                                               |
| PGM3         | chr6 | 83874592 | 83903655 | 29064  | phosphoglucomutase 3                                                |
| RWDD2A       | chr6 | 83903031 | 83906256 | 3226   | RWD domain containing 2A                                            |
| ME1          | chr6 | 83920109 | 84140938 | 220830 | malic enzyme 1, NADP(+)-dependent, cytosolic                        |
| PRSS35       | chr6 | 84222193 | 84235421 | 13229  | protease, serine, 35                                                |
| SNAP91       | chr6 | 84262604 | 84419127 | 156524 | synaptosomal-associated protein, 91kDa                              |
| RIPPLY2      | chr6 | 84562984 | 84567234 | 4251   | rippy transcriptional repressor 2                                   |
| CYB5R4       | chr6 | 84569369 | 84670146 | 100778 | cytochrome b5 reductase 4                                           |
| MRAP2        | chr6 | 84743419 | 84800605 | 57187  | melanocortin 2 receptor accessory protein 2                         |
| KIAA1009     | chr6 | 84833959 | 84937335 | 103377 |                                                                     |
| CEP162       | chr6 | 84833959 | 84937353 | 103395 | centrosomal protein 162kDa                                          |
| LOC102724201 | chr6 | 85399175 | 85419252 | 20078  | uncharacterized LOC102724201                                        |
| TBX18        | chr6 | 85397078 | 85473954 | 76877  | T-box 18                                                            |
| AK024998     | chr6 | 86096936 | 86099904 | 2969   |                                                                     |
| NT5E         | chr6 | 86159301 | 86205509 | 46209  | 5'-nucleotidase, ecto (CD73)                                        |
| SNX14        | chr6 | 86215214 | 86303850 | 88637  | sorting nexin 14                                                    |
| SYNCRIP      | chr6 | 86317501 | 86353043 | 35543  | synaptotagmin binding, cytoplasmic RNA interacting protein          |
| SNORD50A     | chr6 | 86387011 | 86387086 | 76     | small nucleolar RNA, C/D box 50A                                    |
| SNORD50B     | chr6 | 86387306 | 86387377 | 72     | small nucleolar RNA, C/D box 50B                                    |
| SNHG5        | chr6 | 86386724 | 86388451 | 1728   | small nucleolar RNA host gene 5 (non-protein coding)                |
| HTR1E        | chr6 | 87647023 | 87726397 | 79375  | 5-hydroxytryptamine (serotonin) receptor 1E, G protein-coupled      |
| CGA          | chr6 | 87795215 | 87804865 | 9651   | glycoprotein hormones, alpha polypeptide                            |
| ZNF292       | chr6 | 87862550 | 87973406 | 110857 | zinc finger protein 292                                             |
| GJB7         | chr6 | 87992696 | 88038996 | 46301  | gap junction protein, beta 7, 25kDa                                 |
| SMIM8        | chr6 | 88032305 | 88085428 | 53124  | small integral membrane protein 8                                   |
| C6orf163     | chr6 | 88054570 | 88075181 | 20612  | chromosome 6 open reading frame 163                                 |
| C6orf164     | chr6 | 88091719 | 88109459 | 17741  | chromosome 6 open reading frame 164                                 |
| C6orf165     | chr6 | 88117689 | 88205858 | 88170  | chromosome 6 open reading frame 165                                 |
| SLC35A1      | chr6 | 88146443 | 88222057 | 75615  | solute carrier family 35 (CMP-sialic acid transporter), member A1   |
| AK299432     | chr6 | 88218259 | 88218731 | 473    |                                                                     |
| RARS2        | chr6 | 88224095 | 88299735 | 75641  | arginyl-tRNA synthetase 2, mitochondrial                            |
| ORC3         | chr6 | 88299784 | 88377172 | 77389  | origin recognition complex, subunit 3                               |
| AKIRIN2      | chr6 | 88384577 | 88411985 | 27409  | akirin 2                                                            |
| LOC101928911 | chr6 | 88494577 | 88621449 | 126873 | uncharacterized LOC101928911                                        |
| AY927641     | chr6 | 88494577 | 88621449 | 126873 |                                                                     |
| SPACA1       | chr6 | 88757506 | 88776550 | 19045  | sperm acrosome associated 1                                         |
| CNR1         | chr6 | 88849584 | 88875767 | 26184  | cannabinoid receptor 1 (brain)                                      |
| LOC101928936 | chr6 | 89235642 | 89249088 | 13447  | uncharacterized LOC101928936                                        |
| JQ733905     | chr6 | 89372191 | 89380624 | 8434   |                                                                     |
| RNGTT        | chr6 | 89319615 | 89673348 | 353734 | RNA guanylyltransferase and 5'-phosphatase                          |
| PNRC1        | chr6 | 89790428 | 89794879 | 4452   | proline-rich nuclear receptor coactivator 1                         |
| SRSF12       | chr6 | 89805677 | 89827800 | 22124  | serine/arginine-rich splicing factor 12                             |
| PM20D2       | chr6 | 89855768 | 89875288 | 19521  | peptidase M20 domain containing 2                                   |
| GABRR1       | chr6 | 89887222 | 89941007 | 53786  | gamma-aminobutyric acid (GABA) A receptor, rho 1                    |
| GABRR2       | chr6 | 89966839 | 90025018 | 58180  | gamma-aminobutyric acid (GABA) A receptor, rho 2                    |
| UBE2J1       | chr6 | 90036343 | 90062619 | 26277  | ubiquitin-conjugating enzyme E2, J1                                 |
| RRAGD        | chr6 | 90074334 | 90121995 | 47662  | Ras-related GTP binding D                                           |
| ANKRD6       | chr6 | 90142896 | 90343553 | 200658 | ankyrin repeat domain 6                                             |
| LYRM2        | chr6 | 90277862 | 90348474 | 70613  | LYR motif containing 2                                              |
| LOC101929057 | chr6 | 90348250 | 90399200 | 50951  | uncharacterized LOC101929057                                        |
| MDN1         | chr6 | 90352493 | 90529513 | 177021 | MDN1, midasin homolog (yeast)                                       |
| CASP8AP2     | chr6 | 90539618 | 90584155 | 44538  | caspase 8 associated protein 2                                      |
| GJA10        | chr6 | 90604187 | 90605819 | 1633   | gap junction protein, alpha 10, 62kDa                               |
| BACH2        | chr6 | 90636246 | 91006627 | 370382 | BTB and CNC homology 1, basic leucine zipper transcription factor 2 |
| MIR4464      | chr6 | 91022460 | 91022552 | 93     | microRNA 4464                                                       |
| Mir_562      | chr6 | 91177261 | 91177362 | 102    |                                                                     |
| MAP3K7       | chr6 | 91223291 | 91297020 | 73730  | mitogen-activated protein kinase kinase kinase 7                    |
| MIR4643      | chr6 | 92231377 | 92231455 | 79     | microRNA 4643                                                       |
| BC037927     | chr6 | 92338753 | 92400146 | 61394  |                                                                     |
| CASC6        | chr6 | 92338757 | 92400146 | 61390  | cancer susceptibility candidate 6 (non-protein coding)              |
| EPHA7        | chr6 | 93949739 | 94129300 | 179562 | EPH receptor A7                                                     |
| TSG1         | chr6 | 94416800 | 94486199 | 69400  | tumor suppressor TSG1                                               |
| MANEA-AS1    | chr6 | 96007971 | 96025327 | 17357  | MANEA antisense RNA 1 (head to head)                                |
| MANEA        | chr6 | 96025372 | 96057328 | 31957  | mannosidase, endo-alpha                                             |
| FUT9         | chr6 | 96463844 | 96663488 | 199645 | fucosyltransferase 9 (alpha (1,3) fucosyltransferase)               |

|              |      |           |           |        |                                                                                |
|--------------|------|-----------|-----------|--------|--------------------------------------------------------------------------------|
| UFL1         | chr6 | 96969701  | 97003151  | 33451  | UFM1-specific ligase 1                                                         |
| FHL5         | chr6 | 97010423  | 97064512  | 54090  | four and a half LIM domains 5                                                  |
| U4           | chr6 | 97097328  | 97097467  | 140    | RNA, U4A small nuclear                                                         |
| GPR63        | chr6 | 97241997  | 97285353  | 43357  | G protein-coupled receptor 63                                                  |
| NDUFAF4      | chr6 | 97337186  | 97345767  | 8582   | NADH dehydrogenase (ubiquinone) complex I, assembly factor 4                   |
| Metazoa_SRP  | chr6 | 97362643  | 97362871  | 229    |                                                                                |
| KLHL32       | chr6 | 97372495  | 97588630  | 216136 | kelch-like family member 32                                                    |
| MMS22L       | chr6 | 97590036  | 97731061  | 141026 | MMS22-like, DNA repair protein                                                 |
| MIR548H3     | chr6 | 97537842  | 97862283  | 324442 | microRNA 548h-3                                                                |
| AK091365     | chr6 | 97753512  | 98156726  | 403215 |                                                                                |
| LOC101927314 | chr6 | 97753461  | 98156793  | 403333 | uncharacterized LOC101927314                                                   |
| MIR2113      | chr6 | 98472406  | 98472495  | 90     | microRNA 2113                                                                  |
| POU3F2       | chr6 | 99282579  | 99286666  | 4088   | POU class 3 homeobox 2                                                         |
| FBXL4        | chr6 | 99321600  | 99395882  | 74283  | F-box and leucine-rich repeat protein 4                                        |
| FAXC         | chr6 | 99720792  | 99797531  | 76740  | failed axon connections homolog (Drosophila)                                   |
| COQ3         | chr6 | 99817347  | 99842082  | 24736  | coenzyme Q3 methyltransferase                                                  |
| BC033061     | chr6 | 99846536  | 99848504  | 1969   |                                                                                |
| PNISR        | chr6 | 99846536  | 99873207  | 26672  | PNN-interacting serine/arginine-rich protein                                   |
| DQ599242     | chr6 | 99872797  | 99875596  | 2800   |                                                                                |
| LOC101927365 | chr6 | 99872746  | 99879190  | 6445   | uncharacterized LOC101927365                                                   |
| USP45        | chr6 | 99880183  | 99963308  | 83126  | ubiquitin specific peptidase 45                                                |
| TSTD3        | chr6 | 99968869  | 100033084 | 64216  | thiosulfate sulfurtransferase (rhodanese)-like domain containing 3             |
| CCNC         | chr6 | 99990262  | 100016690 | 26429  | cyclin C                                                                       |
| PRDM13       | chr6 | 100054649 | 100063454 | 8806   | PR domain containing 13                                                        |
| MCHR2        | chr6 | 100367785 | 100442114 | 74330  | melanin-concentrating hormone receptor 2                                       |
| MCHR2-AS1    | chr6 | 100441913 | 100524295 | 82383  | MCHR2 antisense RNA 1                                                          |
| LOC728012    | chr6 | 100441913 | 100524295 | 82383  | MCHR2 antisense RNA 1                                                          |
| SIM1         | chr6 | 100836749 | 100912805 | 76057  | single-minded family bHLH transcription factor 1                               |
| ASCC3        | chr6 | 100956070 | 101329248 | 373179 | activating signal cointegrator 1 complex subunit 3                             |
| DQ585302     | chr6 | 101878708 | 101878736 | 29     |                                                                                |
| GRIK2        | chr6 | 101841381 | 102517958 | 676578 | glutamate receptor, ionotropic, kainate 2                                      |
| HACE1        | chr6 | 105175967 | 105307794 | 131828 | HECT domain and ankyrin repeat containing E3 ubiquitin protein ligase 1        |
| LINC00577    | chr6 | 105384168 | 105388402 | 4235   | long intergenic non-protein coding RNA 577                                     |
| LIN28B       | chr6 | 105404922 | 105531207 | 126286 | lin-28 homolog B (C. elegans)                                                  |
| BVES         | chr6 | 105544698 | 105585049 | 40352  | blood vessel epicardial substance                                              |
| BVES-AS1     | chr6 | 105585561 | 105617819 | 32259  | BVES antisense RNA 1                                                           |
| POPDC3       | chr6 | 105605774 | 105627858 | 22085  | popeye domain containing 3                                                     |
| PREP         | chr6 | 105725441 | 105850999 | 125559 | prolyl endopeptidase                                                           |
| PRDM1        | chr6 | 106534194 | 106557814 | 23621  | PR domain containing 1, with ZNF domain                                        |
| ATG5         | chr6 | 106632351 | 106773695 | 141345 | autophagy related 5                                                            |
| AIM1         | chr6 | 106959729 | 107018334 | 58606  | absent in melanoma 1                                                           |
| RTN4IP1      | chr6 | 107018902 | 107078366 | 59465  | reticulon 4 interacting protein 1                                              |
| QRSL1        | chr6 | 107077440 | 107116292 | 38853  | glutaminyl-tRNA synthase (glutamine-hydrolyzing)-like 1                        |
| LOC100422737 | chr6 | 107165326 | 107235300 | 69975  | uncharacterized LOC100422737                                                   |
| AK123416     | chr6 | 107218004 | 107222877 | 4874   |                                                                                |
| C6orf203     | chr6 | 107349375 | 107372790 | 23416  | chromosome 6 open reading frame 203                                            |
| BEND3        | chr6 | 107386384 | 107435636 | 49253  | BEN domain containing 3                                                        |
| PDSS2        | chr6 | 107473760 | 107780779 | 307020 | prenyl (decaprenyl) diphosphate synthase, subunit 2                            |
| SOBP         | chr6 | 107811316 | 107982513 | 171198 | sine oculis binding protein homolog (Drosophila)                               |
| SCML4        | chr6 | 108023360 | 108145521 | 122162 | sex comb on midleg-like 4 (Drosophila)                                         |
| SEC63        | chr6 | 108188959 | 108279482 | 90524  | SEC63 homolog (S. cerevisiae)                                                  |
| AJ420489     | chr6 | 108362675 | 108365439 | 2765   |                                                                                |
| OSTM1        | chr6 | 108362612 | 108395941 | 33330  | osteopetrosis associated transmembrane protein 1                               |
| AF520419     | chr6 | 108444839 | 108479222 | 34384  |                                                                                |
| NR2E1        | chr6 | 108487261 | 108510013 | 22753  | nuclear receptor subfamily 2, group E, member 1                                |
| SNX3         | chr6 | 108532420 | 108582464 | 50045  | sorting nexin 3                                                                |
| LACE1        | chr6 | 108616097 | 108844251 | 228155 | lactation elevated 1                                                           |
| FOXO3        | chr6 | 108881025 | 109005971 | 124947 | forkhead box O3                                                                |
| LINC00222    | chr6 | 109072856 | 109091145 | 18290  | long intergenic non-protein coding RNA 222                                     |
| ARMC2        | chr6 | 109169618 | 109295675 | 126058 | armadillo repeat containing 2                                                  |
| ARMC2-AS1    | chr6 | 109229342 | 109245306 | 15965  | ARMC2 antisense RNA 1                                                          |
| SEN1         | chr6 | 109307639 | 109415708 | 108070 | sestrin 1                                                                      |
| CEP57L1      | chr6 | 109416355 | 109485115 | 68761  | centrosomal protein 57kDa-like 1                                               |
| LOC100996634 | chr6 | 109557816 | 109591717 | 33902  | transmembrane protein FLJ37396                                                 |
| CCDC162P     | chr6 | 109615505 | 109629423 | 13919  | coiled-coil domain containing 162, pseudogene                                  |
| C6orf185     | chr6 | 109659677 | 109676151 | 16475  | coiled-coil domain containing 162, pseudogene                                  |
| CD164        | chr6 | 109687716 | 109703762 | 16047  | CD164 molecule, sialomucin                                                     |
| PPIL6        | chr6 | 109711417 | 109762374 | 50958  | peptidylprolyl isomerase (cyclophilin)-like 6                                  |
| SMPD2        | chr6 | 109761930 | 109765122 | 3193   | sphingomyelin phosphodiesterase 2, neutral membrane (neutral sphingomyelinase) |
| MICAL1       | chr6 | 109765265 | 109787171 | 21907  | microtubule associated monooxygenase, calponin and LIM domain containing 1     |
| ZBTB24       | chr6 | 109783718 | 109804440 | 20723  | zinc finger and BTB domain containing 24                                       |
| AK9          | chr6 | 109850073 | 109871740 | 21668  | adenylate kinase 9                                                             |
| AK9          | chr6 | 109814058 | 110012415 | 198358 | adenylate kinase 9                                                             |
| FIG4         | chr6 | 110012423 | 110146634 | 134212 | FIG4 phosphoinositide 5-phosphatase                                            |
| GPR6         | chr6 | 110299458 | 110301924 | 2467   | G protein-coupled receptor 6                                                   |
| WASF1        | chr6 | 110421021 | 110501207 | 80187  | WAS protein family, member 1                                                   |
| CDC40        | chr6 | 110501623 | 110553422 | 51800  | cell division cycle 40                                                         |
| METTL24      | chr6 | 110567148 | 110731939 | 164792 | methyltransferase like 24                                                      |
| DDO          | chr6 | 110713382 | 110736753 | 23372  | D-aspartate oxidase                                                            |
| SLC22A16     | chr6 | 110745891 | 110797844 | 51954  | solute carrier family 22 (organic cation/carnitine transporter), member 16     |



|              |      |           |           |        |                                                                       |
|--------------|------|-----------|-----------|--------|-----------------------------------------------------------------------|
| CDK19        | chr6 | 110931180 | 111137088 | 205909 | cyclin-dependent kinase 19                                            |
| BC047513     | chr6 | 111133327 | 111136191 | 2865   |                                                                       |
| AMD1         | chr6 | 111135823 | 111216915 | 81093  | adenosylmethionine decarboxylase 1                                    |
| GTF3C6       | chr6 | 111279762 | 111289091 | 9330   | general transcription factor IIIC, polypeptide 6, alpha 35kDa         |
| RPF2         | chr6 | 111303219 | 111349466 | 46248  | ribosome production factor 2 homolog (S. cerevisiae)                  |
| GSTM2P1      | chr6 | 111367621 | 111368757 | 1137   | glutathione S-transferase mu 2 (muscle) pseudogene 1                  |
| SLC16A10     | chr6 | 111408780 | 111544606 | 135827 | solute carrier family 16 (aromatic amino acid transporter), member 10 |
| KIAA1919     | chr6 | 111580481 | 111590261 | 9781   | KIAA1919                                                              |
| REV3L        | chr6 | 111620233 | 111804918 | 184686 | REV3-like, polymerase (DNA directed), zeta, catalytic subunit         |
| AF216583     | chr6 | 111816121 | 111816969 | 849    |                                                                       |
| TRAF3IP2-AS1 | chr6 | 111804674 | 111923497 | 118824 | TRAF3IP2 antisense RNA 1                                              |
| TRAF3IP2     | chr6 | 111876580 | 111927477 | 50898  | TRAF3 interacting protein 2                                           |
| FYN          | chr6 | 111981534 | 112194655 | 213122 | FYN proto-oncogene, Src family tyrosine kinase                        |
| WISP3        | chr6 | 112375277 | 112390887 | 15611  | WNT1 inducible signaling pathway protein 3                            |
| TUBE1        | chr6 | 112391859 | 112408751 | 16893  | tubulin, epsilon 1                                                    |
| FAM229B      | chr6 | 112408673 | 112423993 | 15321  | family with sequence similarity 229, member B                         |
| LAMA4        | chr6 | 112429133 | 112575917 | 146785 | laminin, alpha 4                                                      |
| LOC10192764C | chr6 | 112557796 | 112627885 | 70090  | uncharacterized LOC101927640                                          |
| RFPL4B       | chr6 | 112668531 | 112672498 | 3968   | ret finger protein-like 4B                                            |
| LOC10192768E | chr6 | 113944736 | 113971277 | 26542  | uncharacterized LOC101927686                                          |
| MARCKS       | chr6 | 114178526 | 114184652 | 6127   | myristoylated alanine-rich protein kinase C substrate                 |
| LINC01268    | chr6 | 114189178 | 114194512 | 5335   | long intergenic non-protein coding RNA 1268                           |
| LOC285758    | chr6 | 114189178 | 114194512 | 5335   | long intergenic non-protein coding RNA 1268                           |
| FLJ34503     | chr6 | 114225550 | 114242806 | 17257  | uncharacterized FLJ34503                                              |
| HDAC2        | chr6 | 114257319 | 114292359 | 35041  | histone deacetylase 2                                                 |
| LOC10192776E | chr6 | 114290864 | 114661893 | 371030 | uncharacterized LOC101927768                                          |
| BC042098     | chr6 | 114290864 | 114661899 | 371036 |                                                                       |
| Mir_320      | chr6 | 114499969 | 114500051 | 83     |                                                                       |
| HS3ST5       | chr6 | 114376749 | 114663540 | 286792 | heparan sulfate (glucosamine) 3-O-sulfotransferase 5                  |
| Mir_548      | chr6 | 114598550 | 114598634 | 85     |                                                                       |
| Mir_584      | chr6 | 114743162 | 114743280 | 119    |                                                                       |
| FRK          | chr6 | 116262692 | 116381921 | 119230 | fyn-related Src family tyrosine kinase                                |
| TPI1P3       | chr6 | 116359893 | 116361107 | 1215   | triosephosphate isomerase 1 pseudogene 3                              |
| COL10A1      | chr6 | 116440084 | 116447296 | 7213   | collagen, type X, alpha 1                                             |
| NT5DC1       | chr6 | 116421998 | 116566853 | 144856 | 5'-nucleotidase domain containing 1                                   |
| TSPYL4       | chr6 | 116571130 | 116575261 | 4132   | TSPY-like 4                                                           |
| AK093256     | chr6 | 116575436 | 116577906 | 2471   |                                                                       |
| TSPYL1       | chr6 | 116596021 | 116601280 | 5260   | TSPY-like 1                                                           |
| DSE          | chr6 | 116575335 | 116759442 | 184108 | dermatan sulfate epimerase                                            |
| FAM26F       | chr6 | 116782532 | 116784934 | 2403   | family with sequence similarity 26, member F                          |
| FAM26E       | chr6 | 116832807 | 116839709 | 6903   | family with sequence similarity 26, member E                          |
| TRAPPC3L     | chr6 | 116817650 | 116866773 | 49124  | trafficking protein particle complex 3-like                           |
| FAM26D       | chr6 | 116850175 | 116880031 | 29857  | family with sequence similarity 26, member D                          |
| RWDD1        | chr6 | 116892529 | 116914764 | 22236  | RWD domain containing 1                                               |
| RSPH4A       | chr6 | 116937641 | 116954148 | 16508  | radial spoke head 4 homolog A (Chlamydomonas)                         |
| ZUFSP        | chr6 | 116956780 | 116989973 | 33194  | zinc finger with UFM1-specific peptidase domain                       |
| AX746765     | chr6 | 116999739 | 117001922 | 2184   |                                                                       |
| KPNA5        | chr6 | 117002366 | 117063030 | 60665  | karyopherin alpha 5 (importin alpha 6)                                |
| FAM162B      | chr6 | 117073359 | 117086886 | 13528  | family with sequence similarity 162, member B                         |
| GPRC6A       | chr6 | 117113247 | 117150220 | 36974  | G protein-coupled receptor, class C, group 6, member A                |
| RFX6         | chr6 | 117198375 | 117253326 | 54952  | regulatory factor X, 6                                                |
| VGLL2        | chr6 | 117586720 | 117594728 | 8009   | vestigial-like family member 2                                        |
| ROS1         | chr6 | 117609529 | 117747018 | 137490 | ROS proto-oncogene 1, receptor tyrosine kinase                        |
| GOPC         | chr6 | 117639350 | 117923705 | 284356 | golgi-associated PDZ and coiled-coil motif containing                 |
| DCBLD1       | chr6 | 117803819 | 117891020 | 87202  | discoidin, CUB and LCCL domain containing 1                           |
| AJ420595     | chr6 | 117896482 | 117897548 | 1067   |                                                                       |
| LOC101927919 | chr6 | 117993975 | 117996447 | 2473   | uncharacterized LOC101927919                                          |
| NUS1         | chr6 | 117996616 | 118031886 | 35271  | nuclear undecaprenyl pyrophosphate synthase 1 homolog (S. cerevisiae) |
| SLC35F1      | chr6 | 118228688 | 118638839 | 410152 | solute carrier family 35, member F1                                   |
| BRD7P3       | chr6 | 118822535 | 118824996 | 2462   | bromodomain containing 7 pseudogene 3                                 |
| PLN          | chr6 | 118869441 | 118881587 | 12147  | phospholamban                                                         |
| CEP85L       | chr6 | 118781934 | 119031238 | 249305 | centrosomal protein 85kDa-like                                        |
| LOC100287632 | chr6 | 119103870 | 119104581 | 712    | selenoprotein K pseudogene                                            |
| MCM9         | chr6 | 119134611 | 119256327 | 121717 | minichromosome maintenance complex component 9                        |
| ASF1A        | chr6 | 119215240 | 119230335 | 15096  | anti-silencing function 1A histone chaperone                          |
| FAM184A      | chr6 | 119280993 | 119470358 | 189366 | family with sequence similarity 184, member A                         |
| MIR548B      | chr6 | 119390211 | 119390308 | 98     | microRNA 548b                                                         |
| MAN1A1       | chr6 | 119498365 | 119670931 | 172567 | mannosidase, alpha, class 1A, member 1                                |
| LOC285762    | chr6 | 119773711 | 119812467 | 38757  | uncharacterized LOC285762                                             |
| C6orf170     | chr6 | 121400626 | 121655644 | 255019 | TBC1 domain family, member 32                                         |
| TBC1D32      | chr6 | 121400639 | 121655646 | 255008 | TBC1 domain family, member 32                                         |
| GJA1         | chr6 | 121756722 | 121770890 | 14169  | gap junction protein, alpha 1, 43kDa                                  |
| HSF2         | chr6 | 122720695 | 122754264 | 33570  | heat shock transcription factor 2                                     |
| BC022047     | chr6 | 122757933 | 122760368 | 2436   |                                                                       |
| SERINC1      | chr6 | 122764492 | 122792952 | 28461  | serine incorporator 1                                                 |
| PKIB         | chr6 | 122793061 | 123047518 | 254458 | protein kinase (cAMP-dependent, catalytic) inhibitor beta             |
| FABP7        | chr6 | 123100645 | 123105218 | 4574   | fatty acid binding protein 7, brain                                   |
| SMPDL3A      | chr6 | 123109970 | 123130864 | 20895  | sphingomyelin phosphodiesterase, acid-like 3A                         |
| CLVS2        | chr6 | 123317115 | 123394064 | 76950  | clavesin 2                                                            |
| TRDN         | chr6 | 123537483 | 123958238 | 420756 | triadin                                                               |

|              |      |           |           |         |                                                                      |
|--------------|------|-----------|-----------|---------|----------------------------------------------------------------------|
| LOC10192799C | chr6 | 123760748 | 123792901 | 32154   | uncharacterized LOC101927990                                         |
| AL832096     | chr6 | 123760748 | 123792901 | 32154   |                                                                      |
| NKAIN2       | chr6 | 124124990 | 125146786 | 1021797 | Na+/K+ transporting ATPase interacting 2                             |
| STL          | chr6 | 125229391 | 125284173 | 54783   |                                                                      |
| RNF217-AS1   | chr6 | 125229391 | 125284173 | 54783   | RNF217 antisense RNA 1 (head to head)                                |
| Metazoa_SRP  | chr6 | 125286438 | 125286740 | 303     |                                                                      |
| RNF217       | chr6 | 125283690 | 125407484 | 123795  | ring finger protein 217                                              |
| TPD52L1      | chr6 | 125474874 | 125584644 | 109771  | tumor protein D52-like 1                                             |
| HDDC2        | chr6 | 125596495 | 125623282 | 26788   | HD domain containing 2                                               |
| LOC643623    | chr6 | 125995498 | 126041364 | 45867   | uncharacterized LOC643623                                            |
| BC036196     | chr6 | 126039386 | 126070336 | 30951   |                                                                      |
| HEY2         | chr6 | 126068779 | 126082415 | 13637   | hes-related family bHLH transcription factor with YRPW motif 2       |
| TRNA_Glu     | chr6 | 126101392 | 126101464 | 73      |                                                                      |
| NCOA7        | chr6 | 126102306 | 126253176 | 150871  | nuclear receptor coactivator 7                                       |
| HINT3        | chr6 | 126277860 | 126301389 | 23530   | histidine triad nucleotide binding protein 3                         |
| TRMT11       | chr6 | 126307575 | 126360420 | 52846   | tRNA methyltransferase 11 homolog (S. cerevisiae)                    |
| MIR5695      | chr6 | 126433836 | 126443762 | 9927    | microRNA 5695                                                        |
| CENPW        | chr6 | 126660934 | 126804466 | 143533  | centromere protein W                                                 |
| Vimentin3    | chr6 | 126923379 | 126923444 | 66      |                                                                      |
| AK127472     | chr6 | 126698800 | 127440994 | 742195  |                                                                      |
| RSPO3        | chr6 | 127440047 | 127520626 | 80580   | R-spondin 3                                                          |
| RNF146       | chr6 | 127587826 | 127609705 | 21880   | ring finger protein 146                                              |
| ECHDC1       | chr6 | 127609856 | 127664754 | 54899   | enoyl CoA hydratase domain containing 1                              |
| KIAA0408     | chr6 | 127759550 | 127780535 | 20986   | KIAA0408                                                             |
| SOGA3        | chr6 | 127759550 | 127840500 | 80951   | SOGA family member 3                                                 |
| C6orf58      | chr6 | 12789318  | 127912963 | 14646   | chromosome 6 open reading frame 58                                   |
| THEMIS       | chr6 | 128029338 | 128239776 | 210439  | thymocyte selection associated                                       |
| LOC10192814C | chr6 | 128349009 | 128407435 | 58427   | uncharacterized LOC101928140                                         |
| PTPRK        | chr6 | 128289923 | 128841870 | 551948  | protein tyrosine phosphatase, receptor type, K                       |
| LAMA2        | chr6 | 129204285 | 129837710 | 633426  | laminin, alpha 2                                                     |
| BC035400     | chr6 | 129800757 | 129873731 | 72975   |                                                                      |
| ARHGAP18     | chr6 | 129898239 | 130182692 | 284454  | Rho GTPase activating protein 18                                     |
| TMEM244      | chr6 | 130152388 | 130182416 | 30029   | transmembrane protein 244                                            |
| L3MBTL3      | chr6 | 130339727 | 130462594 | 122868  | l(3)mbt-like 3 (Drosophila)                                          |
| SAMD3        | chr6 | 130465446 | 130686570 | 221125  | sterile alpha motif domain containing 3                              |
| TMEM200A     | chr6 | 130687425 | 130764210 | 76786   | transmembrane protein 200A                                           |
| Mir_562      | chr6 | 131092913 | 131093012 | 100     |                                                                      |
| SMLR1        | chr6 | 131148544 | 131158276 | 9733    | small leucine-rich protein 1                                         |
| EPB41L2      | chr6 | 131160487 | 131384462 | 223976  | erythrocyte membrane protein band 4.1-like 2                         |
| AKAP7        | chr6 | 131456825 | 131604675 | 147851  | A kinase (PRKA) anchor protein 7                                     |
| ARG1         | chr6 | 131894343 | 131905472 | 11130   | arginase 1                                                           |
| MED23        | chr6 | 131895105 | 131949379 | 54275   | mediator complex subunit 23                                          |
| ENPP3        | chr6 | 131949581 | 132068550 | 118970  | ectonucleotide pyrophosphatase/phosphodiesterase 3                   |
| OR2A4        | chr6 | 132020783 | 132022541 | 1759    | olfactory receptor, family 2, subfamily A, member 4                  |
| CTAGE9       | chr6 | 132029580 | 132032157 | 2578    | CTAGE family, member 9                                               |
| ENPP1        | chr6 | 132129155 | 132216295 | 87141   | ectonucleotide pyrophosphatase/phosphodiesterase 1                   |
| DD182001     | chr6 | 132270468 | 132270491 | 24      |                                                                      |
| CTGF         | chr6 | 132269316 | 132272518 | 3203    | connective tissue growth factor                                      |
| LINC01013    | chr6 | 132455117 | 132490514 | 35398   | long intergenic non-protein coding RNA 1013                          |
| LOC100507254 | chr6 | 132455117 | 132490514 | 35398   | long intergenic non-protein coding RNA 1013                          |
| MOXD1        | chr6 | 132617193 | 132722673 | 105481  | monooxygenase, DBH-like 1                                            |
| STX7         | chr6 | 132778662 | 132834337 | 55676   | syntaxin 7                                                           |
| TAAR9        | chr6 | 132859426 | 132860475 | 1050    | trace amine associated receptor 9 (gene/pseudogene)                  |
| TAAR8        | chr6 | 132873831 | 132874860 | 1030    | trace amine associated receptor 8                                    |
| TAAR6        | chr6 | 132891460 | 132892498 | 1039    | trace amine associated receptor 6                                    |
| TAAR5        | chr6 | 132909730 | 132910877 | 1148    | trace amine associated receptor 5                                    |
| TAAR3        | chr6 | 132929363 | 132930441 | 1079    | trace amine associated receptor 3 (gene/pseudogene)                  |
| TAAR2        | chr6 | 132938288 | 132945414 | 7127    | trace amine associated receptor 2                                    |
| TAAR1        | chr6 | 132966122 | 132967142 | 1021    | trace amine associated receptor 1                                    |
| VNN1         | chr6 | 133001996 | 133035194 | 33199   | vanin 1                                                              |
| VNN3         | chr6 | 133043925 | 133055904 | 11980   | vanin 3                                                              |
| VNN2         | chr6 | 133065008 | 133084598 | 19591   | vanin 2                                                              |
| SLC18B1      | chr6 | 133090506 | 133119747 | 29242   | solute carrier family 18, subfamily B, member 1                      |
| SNORD101     | chr6 | 133136445 | 133136518 | 74      | small nucleolar RNA, C/D box 101                                     |
| RPS12        | chr6 | 133135707 | 133138703 | 2997    | ribosomal protein S12                                                |
| SNORD100     | chr6 | 133137940 | 133138016 | 77      | small nucleolar RNA, C/D box 100                                     |
| SNORA33      | chr6 | 133138357 | 133138490 | 134     | small nucleolar RNA, H/ACA box 33                                    |
| LINC00326    | chr6 | 133409218 | 133427717 | 18500   | long intergenic non-protein coding RNA 326                           |
| EYA4         | chr6 | 133561735 | 133853258 | 291524  | EYA transcriptional coactivator and phosphatase 4                    |
| AK093513     | chr6 | 133756215 | 133828795 | 72581   |                                                                      |
| BC041459     | chr6 | 133823389 | 134210120 | 386732  |                                                                      |
| TARID        | chr6 | 133823389 | 134210144 | 386756  | TCF21 antisense RNA inducing promoter demethylation                  |
| LINC01312    | chr6 | 134142284 | 134175130 | 32847   | long intergenic non-protein coding RNA 1312                          |
| MGC34034     | chr6 | 134142284 | 134175130 | 32847   |                                                                      |
| TCF21        | chr6 | 134210258 | 134216675 | 6418    | transcription factor 21                                              |
| AX747860     | chr6 | 134216640 | 134219157 | 2518    |                                                                      |
| TBPL1        | chr6 | 134273307 | 134308638 | 35332   | TBP-like 1                                                           |
| SLC2A12      | chr6 | 134308718 | 134373789 | 65072   | solute carrier family 2 (facilitated glucose transporter), member 12 |
| HMGAI1P7     | chr6 | 134435110 | 134438818 | 3709    | high mobility group AT-hook 1 pseudogene 7                           |
| SGK1         | chr6 | 134490383 | 134639196 | 148814  | serum/glucocorticoid regulated kinase 1                              |

|              |      |           |           |        |                                                                                   |
|--------------|------|-----------|-----------|--------|-----------------------------------------------------------------------------------|
| AJ606330     | chr6 | 134749385 | 134797680 | 48296  |                                                                                   |
| BC040308     | chr6 | 134749385 | 134800051 | 50667  |                                                                                   |
| AJ606328     | chr6 | 134749385 | 134800051 | 50667  |                                                                                   |
| LOC101928231 | chr6 | 134750167 | 134800035 | 49869  | uncharacterized LOC101928231                                                      |
| LINC01010    | chr6 | 134758853 | 134825158 | 66306  | long intergenic non-protein coding RNA 1010                                       |
| LOC154092    | chr6 | 134758853 | 134825158 | 66306  | long intergenic non-protein coding RNA 1010                                       |
| LOC101928304 | chr6 | 134846455 | 134861143 | 14689  | uncharacterized LOC101928304                                                      |
| AJ606331     | chr6 | 134846455 | 134930796 | 84342  |                                                                                   |
| DQ591448     | chr6 | 134943815 | 134943843 | 29     |                                                                                   |
| ALDH8A1      | chr6 | 135238527 | 135271260 | 32734  | aldehyde dehydrogenase 8 family, member A1                                        |
| MIR3662      | chr6 | 135300475 | 135300570 | 96     | microRNA 3662                                                                     |
| HBS1L        | chr6 | 135281516 | 135376036 | 94521  | HBS1-like translational GTPase                                                    |
| MYB          | chr6 | 135502452 | 135540311 | 37860  | v-myb avian myeloblastosis viral oncogene homolog                                 |
| AHI1         | chr6 | 135605109 | 135818903 | 213795 | Abelson helper integration site 1                                                 |
| LINC00271    | chr6 | 135818938 | 136037193 | 218256 | long intergenic non-protein coding RNA 271                                        |
| PDE7B        | chr6 | 136172833 | 136516709 | 343877 | phosphodiesterase 7B                                                              |
| AJ606316     | chr6 | 136175173 | 136546762 | 371590 |                                                                                   |
| BC038719     | chr6 | 136364989 | 136393965 | 28977  |                                                                                   |
| MTFR2        | chr6 | 136552167 | 136571449 | 19283  | mitochondrial fission regulator 2                                                 |
| BCLAF1       | chr6 | 136578000 | 136610989 | 32990  | BCL2-associated transcription factor 1                                            |
| AB073649     | chr6 | 136692055 | 136694961 | 2907   |                                                                                   |
| MAP7         | chr6 | 136663418 | 136871957 | 208540 | microtubule-associated protein 7                                                  |
| LOC101928461 | chr6 | 136950251 | 136969336 | 19086  | uncharacterized LOC101928461                                                      |
| CRISPR_DR35  | chr6 | 136972992 | 136973028 | 37     |                                                                                   |
| MAP3K5       | chr6 | 136878186 | 137113656 | 235471 | mitogen-activated protein kinase kinase kinase 5                                  |
| PEX7         | chr6 | 137143701 | 137235072 | 91372  | peroxisomal biogenesis factor 7                                                   |
| SLC35D3      | chr6 | 137243401 | 137246776 | 3376   | solute carrier family 35, member D3                                               |
| NHEG1        | chr6 | 137303295 | 137314368 | 11074  | neuroblastoma highly expressed 1                                                  |
| IL20RA       | chr6 | 137321107 | 137366317 | 45211  | interleukin 20 receptor, alpha                                                    |
| IL22RA2      | chr6 | 137464956 | 137494785 | 29830  | interleukin 22 receptor, alpha 2                                                  |
| IFNGR1       | chr6 | 137518620 | 137540567 | 21948  | interferon gamma receptor 1                                                       |
| OLIG3        | chr6 | 137813335 | 137815531 | 2197   | oligodendrocyte transcription factor 3                                            |
| LOC102723649 | chr6 | 137986782 | 137995691 | 8910   | uncharacterized LOC102723649                                                      |
| LOC100507406 | chr6 | 138051306 | 138060174 | 8869   | uncharacterized LOC100507406                                                      |
| LOC100130476 | chr6 | 138144806 | 138189370 | 44565  | uncharacterized LOC100130476                                                      |
| TNFAIP3      | chr6 | 138188324 | 138204451 | 16128  | tumor necrosis factor, alpha-induced protein 3                                    |
| PERP         | chr6 | 138409641 | 138428660 | 19020  | PERP, TP53 apoptosis effector                                                     |
| PBOV1        | chr6 | 138537126 | 138539627 | 2502   | prostate and breast cancer overexpressed 1                                        |
| KIAA1244     | chr6 | 138483052 | 138665800 | 182749 | KIAA1244                                                                          |
| HEBP2        | chr6 | 138725335 | 138734582 | 9248   | heme binding protein 2                                                            |
| MIR3145      | chr6 | 138756349 | 138756431 | 83     | microRNA 3145                                                                     |
| NHSL1        | chr6 | 138743180 | 138893668 | 150489 | NHS-like 1                                                                        |
| FLJ46906     | chr6 | 139012804 | 139018425 | 5622   | uncharacterized LOC441172                                                         |
| LOC100507462 | chr6 | 139046347 | 139094816 | 48470  | uncharacterized LOC100507462                                                      |
| CCDC28A      | chr6 | 139094656 | 139114456 | 19801  | coiled-coil domain containing 28A                                                 |
| ECT2L        | chr6 | 139117247 | 139225207 | 107961 | epithelial cell transforming sequence 2 oncogene-like                             |
| REPS1        | chr6 | 139225151 | 139309398 | 84248  | RALBP1 associated Eps domain containing 1                                         |
| ABRACL       | chr6 | 139349818 | 139364439 | 14622  | ABRA C-terminal like                                                              |
| HECA         | chr6 | 139456248 | 139501946 | 45699  | headcase homolog (Drosophila)                                                     |
| TXLNB        | chr6 | 139561198 | 139613208 | 52011  | taxilin beta                                                                      |
| CITED2       | chr6 | 139693391 | 139695787 | 2397   | Cbp/p300-interacting transactivator, with Glu/Asp-rich carboxy-terminal domain, 2 |
| LOC645434    | chr6 | 139790131 | 139795733 | 5603   | uncharacterized LOC645434                                                         |
| LOC100132735 | chr6 | 140092209 | 140181608 | 89400  | uncharacterized LOC100132735                                                      |
| LOC103352541 | chr6 | 140299486 | 140312398 | 12913  | uncharacterized LOC103352541                                                      |
| LOC100507477 | chr6 | 140297455 | 140414858 | 117404 | uncharacterized LOC100507477                                                      |
| BC038188     | chr6 | 140297466 | 140414858 | 117393 |                                                                                   |
| MIR3668      | chr6 | 140526388 | 140526463 | 76     | microRNA 3668                                                                     |
| MIR4465      | chr6 | 141004950 | 141005020 | 71     | microRNA 4465                                                                     |
| AK097143     | chr6 | 141902805 | 142351554 | 448750 |                                                                                   |
| JA611295     | chr6 | 142334791 | 142334865 | 75     |                                                                                   |
| JA611294     | chr6 | 142334796 | 142334860 | 65     |                                                                                   |
| NMBR         | chr6 | 142396744 | 142409936 | 13193  | neuromedin B receptor                                                             |
| VTA1         | chr6 | 142468298 | 142542085 | 73788  | vesicle (multivesicular body) trafficking 1                                       |
| TRNA_Gly     | chr6 | 142578775 | 142578846 | 72     |                                                                                   |
| GPR126       | chr6 | 142623055 | 142767403 | 144349 | G protein-coupled receptor 126                                                    |
| LOC153910    | chr6 | 142847591 | 142959026 | 111436 | uncharacterized LOC153910                                                         |
| HIVEP2       | chr6 | 143072603 | 143266338 | 193736 | human immunodeficiency virus type I enhancer binding protein 2                    |
| LINC01277    | chr6 | 143287558 | 143358719 | 71162  | long intergenic non-protein coding RNA 1277                                       |
| LOC100507489 | chr6 | 143287558 | 143358719 | 71162  | long intergenic non-protein coding RNA 1277                                       |
| AIG1         | chr6 | 143380499 | 143661480 | 280982 | androgen-induced 1                                                                |
| ADAT2        | chr6 | 143743968 | 143771841 | 27874  | adenosine deaminase, tRNA-specific 2                                              |
| PEX3         | chr6 | 143771917 | 143811751 | 39835  | peroxisomal biogenesis factor 3                                                   |
| FUCA2        | chr6 | 143815948 | 143833020 | 17073  | fucosidase, alpha-L- 2, plasma                                                    |
| LOC285740    | chr6 | 143875251 | 143890476 | 15226  | uncharacterized LOC285740                                                         |
| PHACTR2      | chr6 | 143929316 | 144152322 | 223007 | phosphatase and actin regulator 2                                                 |
| LTV1         | chr6 | 144164507 | 144184943 | 20437  | LTV1 ribosome biogenesis factor                                                   |
| AX746989     | chr6 | 144175205 | 144177090 | 1886   |                                                                                   |
| ZC2HC1B      | chr6 | 144178439 | 144259483 | 81045  | zinc finger, C2HC-type containing 1B                                              |
| PLAGL1       | chr6 | 144261436 | 144385736 | 124301 | pleiomorphic adenoma gene-like 1                                                  |
| HYMAI        | chr6 | 144324033 | 144329867 | 5835   | hydantidiform mole associated and imprinted (non-protein coding)                  |

|              |      |           |           |        |                                                                               |
|--------------|------|-----------|-----------|--------|-------------------------------------------------------------------------------|
| SF3B5        | chr6 | 144416017 | 144416754 | 738    | splicing factor 3b, subunit 5, 10kDa                                          |
| STX11        | chr6 | 144471653 | 144513076 | 41424  | syntaxin 11                                                                   |
| UTRN         | chr6 | 144607489 | 145174170 | 566682 | utrophin                                                                      |
| EPM2A        | chr6 | 145946439 | 146057122 | 110684 | epilepsy, progressive myoclonus type 2A, Lafora disease (laforin)             |
| FLJ44955     | chr6 | 146110405 | 146113109 | 2705   |                                                                               |
| FBXO30       | chr6 | 146119271 | 146135921 | 16651  | F-box protein 30                                                              |
| LOC100507557 | chr6 | 146056004 | 146207721 | 151718 | uncharacterized LOC100507557                                                  |
| SHPRH        | chr6 | 146205944 | 146285233 | 79290  | SNF2 histone linker PHD RING helicase                                         |
| GRM1         | chr6 | 146348781 | 146758734 | 409954 | glutamate receptor, metabotropic 1                                            |
| RAB32        | chr6 | 146864827 | 146876086 | 11260  | RAB32, member RAS oncogene family                                             |
| FW339973     | chr6 | 146870894 | 146873504 | 2611   |                                                                               |
| LOC101928661 | chr6 | 146915651 | 146920067 | 4417   | uncharacterized LOC101928661                                                  |
| ADGB         | chr6 | 146920135 | 147136597 | 216463 | androglobin                                                                   |
| KATNBL1P6    | chr6 | 147122804 | 147124960 | 2157   | katanin p80 subunit B-like 1 pseudogene 6                                     |
| LOC729176    | chr6 | 147122804 | 147124960 | 2157   | katanin p80 subunit B-like 1 pseudogene 6                                     |
| STXBP5-AS1   | chr6 | 147162524 | 147525750 | 363227 | STXBP5 antisense RNA 1                                                        |
| STXBP5       | chr6 | 147525493 | 147711612 | 186120 | syntaxin binding protein 5 (tomosyn)                                          |
| BC043173     | chr6 | 147708803 | 147711603 | 2801   |                                                                               |
| SAMD5        | chr6 | 147829827 | 147891157 | 61331  | sterile alpha motif domain containing 5                                       |
| BC047626     | chr6 | 148048811 | 148051503 | 2693   |                                                                               |
| SASH1        | chr6 | 148663728 | 148873184 | 209457 | SAM and SH3 domain containing 1                                               |
| UST          | chr6 | 149068270 | 149398126 | 329857 | uronyl-2-sulfotransferase                                                     |
| LOC100128176 | chr6 | 149275396 | 149285820 | 10425  | uncharacterized LOC100128176                                                  |
| BC041998     | chr6 | 149539061 | 149544218 | 5158   |                                                                               |
| TAB2         | chr6 | 149539059 | 149732749 | 193691 | TGF-beta activated kinase 1/MAP3K7 binding protein 2                          |
| SUMO4        | chr6 | 149721494 | 149722182 | 689    | small ubiquitin-like modifier 4                                               |
| ZC3H12D      | chr6 | 149768765 | 149806148 | 37384  | zinc finger CCH-type containing 12D                                           |
| PPIL4        | chr6 | 149825630 | 149867238 | 41609  | peptidylprolyl isomerase (cyclophilin)-like 4                                 |
| GINM1        | chr6 | 149887527 | 149912067 | 24541  | glycoprotein integral membrane 1                                              |
| RPS18P9      | chr6 | 149914751 | 149915720 | 970    | ribosomal protein S18 pseudogene 9                                            |
| KATNA1       | chr6 | 149916010 | 149969940 | 53931  | katanin p60 (ATPase containing) subunit A 1                                   |
| LATS1        | chr6 | 149979288 | 150039392 | 60105  | large tumor suppressor kinase 1                                               |
| NUP43        | chr6 | 150045451 | 150067708 | 22258  | nucleoporin 43kDa                                                             |
| PCMT1        | chr6 | 150070830 | 150132557 | 61728  | protein-L-isoaspartate (D-aspartate) O-methyltransferase                      |
| LRP11        | chr6 | 150139893 | 150185480 | 45588  | low density lipoprotein receptor-related protein 11                           |
| RAET1E       | chr6 | 150204510 | 150217195 | 12686  | retinoic acid early transcript 1E                                             |
| RAET1E-AS1   | chr6 | 150184633 | 150240644 | 56012  | RAET1E antisense RNA 1                                                        |
| LOC100652739 | chr6 | 150184633 | 150240644 | 56012  | RAET1E antisense RNA 1                                                        |
| RAET1G       | chr6 | 150238013 | 150244214 | 6202   | retinoic acid early transcript 1G                                             |
| BC040898     | chr6 | 150255662 | 150257455 | 1794   |                                                                               |
| ULBP2        | chr6 | 150263135 | 150270368 | 7234   | UL16 binding protein 2                                                        |
| ULBP1        | chr6 | 150285142 | 150294846 | 9705   | UL16 binding protein 1                                                        |
| RAET1K       | chr6 | 150319154 | 150326280 | 7127   | retinoic acid early transcript 1K pseudogene                                  |
| RAET1L       | chr6 | 150341265 | 150346668 | 5404   | retinoic acid early transcript 1L                                             |
| ULBP3        | chr6 | 150383340 | 150390283 | 6944   | UL16 binding protein 3                                                        |
| PPP1R14C     | chr6 | 150464187 | 150571528 | 107342 | protein phosphatase 1, regulatory (inhibitor) subunit 14C                     |
| IYD          | chr6 | 150690027 | 150725765 | 35739  | iodotyrosine deiodinase                                                       |
| PLEKHG1      | chr6 | 150920998 | 151164799 | 243802 | pleckstrin homology domain containing, family G (with RhoGef domain) member 1 |
| MTHFD1L      | chr6 | 151186814 | 151423023 | 236210 | methylenetetrahydrofolate dehydrogenase (NADP+ dependent) 1-like              |
| LOC102723831 | chr6 | 151517807 | 151549592 | 31786  | uncharacterized LOC102723831                                                  |
| BC031960     | chr6 | 151517807 | 151549592 | 31786  |                                                                               |
| AKAP12       | chr6 | 151561133 | 151679694 | 118562 | A kinase (PKA) anchor protein 12                                              |
| C6orf211     | chr6 | 151773392 | 151791234 | 17843  | chromosome 6 open reading frame 211                                           |
| CCDC170      | chr6 | 151815174 | 151942328 | 127155 | coiled-coil domain containing 170                                             |
| ESR1         | chr6 | 151977829 | 152424408 | 446580 | estrogen receptor 1                                                           |
| SYNE1        | chr6 | 152656412 | 152702497 | 46086  | spectrin repeat containing, nuclear envelope 1                                |
| SYNE1        | chr6 | 152442818 | 152958534 | 515717 | spectrin repeat containing, nuclear envelope 1                                |
| SYNE1-AS1    | chr6 | 152701664 | 152702847 | 1184   | SYNE1 antisense RNA 1                                                         |
| MYCT1        | chr6 | 153019029 | 153045715 | 26687  | myc target 1                                                                  |
| VIP          | chr6 | 153071931 | 153080902 | 8972   | vasoactive intestinal peptide                                                 |
| FBXO5        | chr6 | 153291657 | 153304740 | 13084  | F-box protein 5                                                               |
| MTRF1L       | chr6 | 153308399 | 153323925 | 15527  | mitochondrial translational release factor 1-like                             |
| RGS17        | chr6 | 153332031 | 153452389 | 120359 | regulator of G-protein signaling 17                                           |
| OPRM1        | chr6 | 154331630 | 154568001 | 236372 | opioid receptor, mu 1                                                         |
| IPCEF1       | chr6 | 154475617 | 154831753 | 356137 | interaction protein for cytohesin exchange factors 1                          |
| CNKSR3       | chr6 | 154726432 | 154831753 | 105322 | CNKSR family member 3                                                         |
| SCAF8        | chr6 | 155054511 | 155155378 | 100868 | SR-related CTD-associated factor 8                                            |
| AK124484     | chr6 | 155184661 | 155230000 | 45340  |                                                                               |
| U8           | chr6 | 155226209 | 155226340 | 132    | small nucleolar RNA, C/D box 118                                              |
| TIAM2        | chr6 | 155153830 | 155578857 | 425028 | T-cell lymphoma invasion and metastasis 2                                     |
| AB075492     | chr6 | 155572433 | 155575064 | 2632   |                                                                               |
| AK022993     | chr6 | 155574273 | 155577858 | 3586   |                                                                               |
| CLDN20       | chr6 | 155585146 | 155597682 | 12537  | claudin 20                                                                    |
| TFB1M        | chr6 | 155577263 | 155635617 | 58355  | transcription factor B1, mitochondrial                                        |
| NOX3         | chr6 | 155716501 | 155777037 | 60537  | NADPH oxidase 3                                                               |
| MIR4466      | chr6 | 157100811 | 157100865 | 55     | microRNA 4466                                                                 |
| ARID1B       | chr6 | 157099063 | 157531913 | 432851 | AT rich interactive domain 1B (SWI1-like)                                     |
| TMEM242      | chr6 | 157710053 | 157745291 | 35239  | transmembrane protein 242                                                     |
| ZDHHC14      | chr6 | 157802556 | 158094977 | 292422 | zinc finger, DHHC-type containing 14                                          |
| SNX9         | chr6 | 158244202 | 158366109 | 121908 | sorting nexin 9                                                               |

|              |      |           |           |         |                                                                 |
|--------------|------|-----------|-----------|---------|-----------------------------------------------------------------|
| SYNJ2-IT1    | chr6 | 158422138 | 158423415 | 1278    | SYNJ2 intronic transcript 1 (non-protein coding)                |
| AK026758     | chr6 | 158448398 | 158450058 | 1661    |                                                                 |
| SYNJ2        | chr6 | 158402887 | 158520207 | 117321  | synaptojanin 2                                                  |
| SERAC1       | chr6 | 158530535 | 158589312 | 58778   | serine active site containing 1                                 |
| GTF2H5       | chr6 | 158589378 | 158620376 | 30999   | general transcription factor IIH, polypeptide 5                 |
| TULP4        | chr6 | 158733691 | 158932856 | 199166  | tubby like protein 4                                            |
| DQ581726     | chr6 | 158981118 | 158981146 | 29      |                                                                 |
| TMEM181      | chr6 | 158957467 | 159056467 | 99001   | transmembrane protein 181                                       |
| MIR7161      | chr6 | 159030738 | 159030822 | 85      | microRNA 7161                                                   |
| DQ586009     | chr6 | 159031785 | 159031813 | 29      |                                                                 |
| DYNLT1       | chr6 | 159057506 | 159065818 | 8313    | dynein, light chain, Tctex-type 1                               |
| SYTL3        | chr6 | 159071045 | 159185908 | 114864  | synaptotagmin-like 3                                            |
| EZR          | chr6 | 159186772 | 159240456 | 53685   | ezrin                                                           |
| AX747826     | chr6 | 159219681 | 159221893 | 2213    |                                                                 |
| EZR-AS1      | chr6 | 159239010 | 159243272 | 4263    | EZR antisense RNA 1                                             |
| OSTCP1       | chr6 | 159262157 | 159278664 | 16508   | oligosaccharyltransferase complex subunit pseudogene 1          |
| C6orf99      | chr6 | 159309618 | 159331385 | 21768   | chromosome 6 open reading frame 99                              |
| RSPH3        | chr6 | 159398265 | 159421198 | 22934   | radial spoke 3 homolog (Chlamydomonas)                          |
| TAGAP        | chr6 | 159455500 | 159466184 | 10685   | T-cell activation RhoGTPase activating protein                  |
| LOC101929122 | chr6 | 159586930 | 159591039 | 4110    | uncharacterized LOC101929122                                    |
| FNDC1        | chr6 | 159590428 | 159693140 | 102713  | fibronectin type III domain containing 1                        |
| LOC102724053 | chr6 | 159804562 | 159817473 | 12912   | uncharacterized LOC102724053                                    |
| AK130765     | chr6 | 160007986 | 160010201 | 2216    |                                                                 |
| BC016015     | chr6 | 160100148 | 160101403 | 1256    |                                                                 |
| SOD2         | chr6 | 160100148 | 160114353 | 14206   | superoxide dismutase 2, mitochondrial                           |
| WTAP         | chr6 | 160148029 | 160177352 | 29324   | Wilms tumor 1 associated protein                                |
| LOC100129518 | chr6 | 160181290 | 160183364 | 2075    | uncharacterized LOC100129518                                    |
| ACAT2        | chr6 | 160182988 | 160200087 | 17100   | acetyl-CoA acetyltransferase 2                                  |
| SNORA20      | chr6 | 160201281 | 160201413 | 133     | small nucleolar RNA, H/ACA box 20                               |
| TCP1         | chr6 | 160199529 | 160210735 | 11207   | t-complex 1                                                     |
| SNORA29      | chr6 | 160206625 | 160206765 | 141     | small nucleolar RNA, H/ACA box 29                               |
| MRPL18       | chr6 | 160211021 | 160219461 | 8441    | mitochondrial ribosomal protein L18                             |
| PNLDC1       | chr6 | 160221280 | 160241736 | 20457   | poly(A)-specific ribonuclease (PARN)-like domain containing 1   |
| MAS1         | chr6 | 160327973 | 160329107 | 1135    | MAS1 proto-oncogene, G protein-coupled receptor                 |
| AIRN         | chr6 | 160424322 | 160428696 | 4375    | antisense of IGF2R non-protein coding RNA                       |
| IGF2R        | chr6 | 160390130 | 160527583 | 137454  | insulin-like growth factor 2 receptor                           |
| SLC22A1      | chr6 | 160542862 | 160579750 | 36889   | solute carrier family 22 (organic cation transporter), member 1 |
| SLC22A2      | chr6 | 160637793 | 160679963 | 42171   | solute carrier family 22 (organic cation transporter), member 2 |
| SLC22A3      | chr6 | 160769404 | 160873611 | 104208  | solute carrier family 22 (organic cation transporter), member 3 |
| LPAL2        | chr6 | 160887586 | 160932156 | 44571   | lipoprotein, Lp(a)-like 2, pseudogene                           |
| LPA          | chr6 | 160952514 | 161087407 | 134894  | lipoprotein, Lp(a)                                              |
| PLG          | chr6 | 161123224 | 161175085 | 51862   | plasminogen                                                     |
| MAP3K4       | chr6 | 161412758 | 161538417 | 125660  | mitogen-activated protein kinase kinase kinase 4                |
| AGPAT4-IT1   | chr6 | 161581163 | 161583014 | 1852    | AGPAT4 intronic transcript 1 (non-protein coding)               |
| AGPAT4       | chr6 | 161551056 | 161695107 | 144052  | 1-acylglycerol-3-phosphate O-acyltransferase 4                  |
| PARK2        | chr6 | 161768589 | 163148834 | 1380246 | parkin RBR E3 ubiquitin protein ligase                          |
| PACRG        | chr6 | 163148163 | 163736524 | 588362  | PARK2 co-regulated                                              |
| LOC101929235 | chr6 | 163464011 | 163475193 | 11183   | uncharacterized LOC101929235                                    |
| AK058177     | chr6 | 163464011 | 163475193 | 11183   |                                                                 |
| AK296276     | chr6 | 163586445 | 163612840 | 26396   |                                                                 |
| LOC729658    | chr6 | 163602676 | 163613034 | 10359   | uncharacterized LOC729658                                       |
| AK311212     | chr6 | 163603634 | 163613034 | 9401    |                                                                 |
| DKFZp451B08c | chr6 | 163759373 | 163768065 | 8693    | uncharacterized LOC401282                                       |
| CAHM         | chr6 | 163834096 | 163834982 | 887     | colon adenocarcinoma hypermethylated (non-protein coding)       |
| QKI          | chr6 | 163835674 | 163999628 | 163955  | QKI, KH domain containing, RNA binding                          |
| AK093114     | chr6 | 164092635 | 164195657 | 103023  |                                                                 |
| AK090788     | chr6 | 165206863 | 165235542 | 28680   |                                                                 |
| C6orf118     | chr6 | 165693152 | 165723111 | 29960   | chromosome 6 open reading frame 118                             |
| PDE10A       | chr6 | 165740775 | 166075588 | 334814  | phosphodiesterase 10A                                           |
| AK090688     | chr6 | 166193756 | 166399984 | 206229  |                                                                 |
| LINC00473    | chr6 | 166337535 | 166401527 | 63993   | long intergenic non-protein coding RNA 473                      |
| LINC00602    | chr6 | 166401038 | 166403103 | 2066    | long intergenic non-protein coding RNA 602                      |
| T            | chr6 | 166571145 | 166582157 | 11013   | T, brachyury homolog (mouse)                                    |
| LOC101929297 | chr6 | 166650456 | 166670432 | 19977   | uncharacterized LOC101929297                                    |
| PRR18        | chr6 | 166719167 | 166721871 | 2705    | proline rich 18                                                 |
| SFT2D1       | chr6 | 166733516 | 166755991 | 22476   | SFT2 domain containing 1                                        |
| LOC100289495 | chr6 | 166756118 | 166764957 | 8840    | uncharacterized LOC100289495                                    |
| MPC1         | chr6 | 166778407 | 166796501 | 18095   | mitochondrial pyruvate carrier 1                                |
| RPS6KA2-IT1  | chr6 | 166874150 | 166878871 | 4722    | RPS6KA2 intronic transcript 1 (non-protein coding)              |
| MIR1913      | chr6 | 166922841 | 166922921 | 81      | microRNA 1913                                                   |
| RPS6KA2      | chr6 | 166822853 | 167275771 | 452919  | ribosomal protein S6 kinase, 90kDa, polypeptide 2               |
| RPS6KA2-AS1  | chr6 | 167317185 | 167318557 | 1373    | RPS6KA2 antisense RNA 1                                         |
| MIR3939      | chr6 | 167411294 | 167411400 | 107     | microRNA 3939                                                   |
| FGFR1OP      | chr6 | 167412804 | 167455906 | 43103   | FGFR1 oncogene partner                                          |
| CCR6         | chr6 | 167412815 | 167552629 | 139815  | chemokine (C-C motif) receptor 6                                |
| GPR31        | chr6 | 167570359 | 167571319 | 961     | G protein-coupled receptor 31                                   |
| TCP10L2      | chr6 | 167584080 | 167596396 | 12317   | t-complex 10-like 2                                             |
| UNC93A       | chr6 | 167704802 | 167729502 | 24701   | unc-93 homolog A (C. elegans)                                   |
| TLL2         | chr6 | 167738573 | 167756177 | 17605   | tubulin tyrosine ligase-like family, member 2                   |
| TCP10        | chr6 | 167770520 | 167797998 | 27479   | t-complex 10                                                    |

|                       |       |           |           |        |                                                                                                |
|-----------------------|-------|-----------|-----------|--------|------------------------------------------------------------------------------------------------|
| LOC401286             | chr6  | 168067521 | 168079903 | 12383  | uncharacterized LOC401286                                                                      |
| AK127120              | chr6  | 168067523 | 168079903 | 12381  |                                                                                                |
| LOC441178             | chr6  | 168080305 | 168084736 | 4432   | uncharacterized LOC441178                                                                      |
| AL832737              | chr6  | 168080305 | 168096970 | 16666  |                                                                                                |
| C6orf123              | chr6  | 168185218 | 168197539 | 12322  | chromosome 6 open reading frame 123                                                            |
| MLLT4-AS1             | chr6  | 168224569 | 168227476 | 2908   | MLLT4 antisense RNA 1 (head to head)                                                           |
| MLL/AF6 fusion        | chr6  | 168265223 | 168265426 | 204    |                                                                                                |
| MLLT4                 | chr6  | 168227670 | 168372700 | 145031 | myeloid/lymphoid or mixed-lineage leukemia (trithorax homolog, Drosophila); translocated to, 4 |
| BX649158              | chr6  | 168362689 | 168365707 | 3019   |                                                                                                |
| HGC6.3                | chr6  | 168376603 | 168377619 | 1017   | uncharacterized LOC100128124                                                                   |
| HGC6.1.1              | chr6  | 168393501 | 168397757 | 4257   | non-protein coding RNA 300                                                                     |
| KIF25-AS1             | chr6  | 168394866 | 168397757 | 2892   | KIF25 antisense RNA 1                                                                          |
| KIF25                 | chr6  | 168399771 | 168445769 | 45999  | kinesin family member 25                                                                       |
| FRMD1                 | chr6  | 168456463 | 168482237 | 25775  | FERM domain containing 1                                                                       |
| LOC101929420          | chr6  | 168643617 | 168663258 | 19642  | uncharacterized LOC101929420                                                                   |
| DACT2                 | chr6  | 168693509 | 168720434 | 26926  | dishevelled-binding antagonist of beta-catenin 2                                               |
| SMOC2                 | chr6  | 168841830 | 169068674 | 226845 | SPARC related modular calcium binding 2                                                        |
| LOC101929504          | chr6  | 169575398 | 169582835 | 7438   | uncharacterized LOC101929504                                                                   |
| AF086258              | chr6  | 169575398 | 169582835 | 7438   |                                                                                                |
| THBS2                 | chr6  | 169615874 | 169654209 | 38336  | thrombospondin 2                                                                               |
| AK055570              | chr6  | 169773775 | 169788480 | 14706  |                                                                                                |
| WDR27                 | chr6  | 169857302 | 170102159 | 244858 | WD repeat domain 27                                                                            |
| AK128656              | chr6  | 170060912 | 170063234 | 2323   |                                                                                                |
| C6orf120              | chr6  | 170102232 | 170106402 | 4171   | chromosome 6 open reading frame 120                                                            |
| PHF10                 | chr6  | 170104001 | 170124106 | 20106  | PHD finger protein 10                                                                          |
| TCTE3                 | chr6  | 170140214 | 170151638 | 11425  | t-complex-associated-testis-expressed 3                                                        |
| AK023627              | chr6  | 170149607 | 170151679 | 2073   |                                                                                                |
| C6orf70               | chr6  | 170151720 | 170181617 | 29898  | ER membrane-associated RNA degradation                                                         |
| ERMARD                | chr6  | 170151717 | 170181680 | 29964  | ER membrane-associated RNA degradation                                                         |
| LINC00242             | chr6  | 170188885 | 170198921 | 10037  | long intergenic non-protein coding RNA 242                                                     |
| LINC00574             | chr6  | 170190168 | 170202969 | 12802  | long intergenic non-protein coding RNA 574                                                     |
| LOC154449             | chr6  | 170563421 | 170571657 | 8237   | uncharacterized LOC154449                                                                      |
| LOC285804             | chr6  | 170575756 | 170585850 | 10095  | uncharacterized LOC285804                                                                      |
| FLJ38122              | chr6  | 170581561 | 170588554 | 6994   | uncharacterized LOC401289                                                                      |
| DLL1                  | chr6  | 170591293 | 170599697 | 8405   | delta-like 1 (Drosophila)                                                                      |
| MIR4644               | chr6  | 170639848 | 170639932 | 85     | microRNA 4644                                                                                  |
| FAM120B               | chr6  | 170599790 | 170716159 | 116370 | family with sequence similarity 120B                                                           |
| PSMB1                 | chr6  | 170780106 | 170862417 | 82312  | proteasome (prosome, macropain) subunit, beta type, 1                                          |
| TBP                   | chr6  | 170863420 | 170881958 | 18539  | TATA box binding protein                                                                       |
| PDCD2                 | chr6  | 170884659 | 170893780 | 9122   | programmed cell death 2                                                                        |
| BC036251              | chr6  | 171004401 | 171006035 | 1635   |                                                                                                |
| TCR V3-JP2-C $\gamma$ | chr7  | 38288826  | 38295990  | 7165   |                                                                                                |
| TRGC2                 | chr7  | 38279180  | 38356821  | 77642  | T cell receptor gamma constant 2                                                               |
| TARP                  | chr7  | 38279180  | 38357589  | 78410  | TCR gamma alternate reading frame protein                                                      |
| TCRGC2                | chr7  | 38288843  | 38356709  | 67867  | T cell receptor gamma constant 2 (2x)                                                          |
| TCRGV                 | chr7  | 38339411  | 38339881  | 471    |                                                                                                |
| AK096766              | chr7  | 38342348  | 38344378  | 2031   |                                                                                                |
| B4GALNT4              | chr11 | 369794    | 382117    | 12324  | beta-1,4-N-acetyl-galactosaminyl transferase 4                                                 |
| PKP3                  | chr11 | 392598    | 404908    | 12311  | plakophilin 3                                                                                  |
| SIGIRR                | chr11 | 405715    | 417397    | 11683  | single immunoglobulin and toll-interleukin 1 receptor (TIR) domain                             |
| ANO9                  | chr11 | 417929    | 442011    | 24083  | anoctamin 9                                                                                    |
| Metazoa_SRP           | chr11 | 440404    | 440693    | 290    |                                                                                                |
| PTDSS2                | chr11 | 450279    | 491387    | 41109  | phosphatidylserine synthase 2                                                                  |
| RNH1                  | chr11 | 494511    | 507283    | 12773  | ribonuclease/angiogenesis inhibitor 1                                                          |
| HRAS                  | chr11 | 532241    | 535550    | 3310   | Harvey rat sarcoma viral oncogene homolog                                                      |
| LRRC56                | chr11 | 537521    | 554916    | 17396  | leucine rich repeat containing 56                                                              |
| LMNTD2                | chr11 | 554849    | 560779    | 5931   | lamin tail domain containing 2                                                                 |
| C11orf35              | chr11 | 554849    | 560779    | 5931   | lamin tail domain containing 2                                                                 |
| AX748330              | chr11 | 557594    | 560107    | 2514   |                                                                                                |
| BC031953              | chr11 | 559476    | 560107    | 632    |                                                                                                |
| RASSF7                | chr11 | 560970    | 564025    | 3056   | Ras association (RalGDS/AF-6) domain family (N-terminal) member 7                              |
| MIR210HG              | chr11 | 565656    | 568457    | 2802   | MIR210 host gene (non-protein coding)                                                          |
| MIR210                | chr11 | 568088    | 568198    | 111    | microRNA 210                                                                                   |
| CD151                 | chr11 | 832951    | 838835    | 5885   | CD151 molecule (Raph blood group)                                                              |
| POLR2L                | chr11 | 839720    | 842529    | 2810   | polymerase (RNA) II (DNA directed) polypeptide L, 7.6kDa                                       |
| TSPAN4                | chr11 | 842823    | 867116    | 24294  | tetraspanin 4                                                                                  |
| AK126635              | chr11 | 856879    | 858707    | 1829   |                                                                                                |
| AX747537              | chr11 | 880866    | 881475    | 610    |                                                                                                |
| CHID1                 | chr11 | 867356    | 915058    | 47703  | chitinase domain containing 1                                                                  |
| BRSK2                 | chr11 | 1411128   | 1483919   | 72792  | BR serine/threonine kinase 2                                                                   |
| MOB2                  | chr11 | 1490677   | 1508009   | 17333  | MOB kinase activator 2                                                                         |
| DUSP8                 | chr11 | 1575280   | 1593150   | 17871  | dual specificity phosphatase 8                                                                 |
| KRTAP5-1              | chr11 | 1605571   | 1606513   | 943    | keratin associated protein 5-1                                                                 |
| KRTAP5-AS1            | chr11 | 1593970   | 1620414   | 26445  | KRTAP5-1/KRTAP5-2 antisense RNA 1                                                              |
| KRTAP5-2              | chr11 | 1618406   | 1619524   | 1119   | keratin associated protein 5-2                                                                 |
| KRTAP5-3              | chr11 | 1628794   | 1629693   | 900    | keratin associated protein 5-3                                                                 |
| KRTAP5-4              | chr11 | 1642187   | 1643368   | 1182   | keratin associated protein 5-4                                                                 |
| MIR483                | chr11 | 2155363   | 2155439   | 77     | microRNA 483                                                                                   |
| IGF2                  | chr11 | 2150341   | 2170833   | 20493  | insulin-like growth factor 2                                                                   |
| IGF2-AS               | chr11 | 2161757   | 2169896   | 8140   | IGF2 antisense RNA                                                                             |

|               |       |         |         |        |                                                                                |
|---------------|-------|---------|---------|--------|--------------------------------------------------------------------------------|
| INS-IGF2      | chr11 | 2150341 | 2182439 | 32099  | INS-IGF2 readthrough                                                           |
| INS           | chr11 | 2181008 | 2182439 | 1432   | insulin                                                                        |
| TH            | chr11 | 2185158 | 2193035 | 7878   | tyrosine hydroxylase                                                           |
| MIR4686       | chr11 | 2194292 | 2194368 | 77     | microRNA 4686                                                                  |
| C11orf21      | chr11 | 2317506 | 2323143 | 5638   | chromosome 11 open reading frame 21                                            |
| TSPAN32       | chr11 | 2323242 | 2339430 | 16189  | tetraspanin 32                                                                 |
| CD81-AS1      | chr11 | 2349978 | 2399222 | 49245  | CD81 antisense RNA 1                                                           |
| BC019904      | chr11 | 2349978 | 2399222 | 49245  |                                                                                |
| CD81          | chr11 | 2397406 | 2418649 | 21244  | CD81 molecule                                                                  |
| TSSC4         | chr11 | 2421717 | 2425108 | 3392   | tumor suppressing subtransferable candidate 4                                  |
| TRPM5         | chr11 | 2425745 | 2444275 | 18531  | transient receptor potential cation channel, subfamily M, member 5             |
| KCNQ1         | chr11 | 2466220 | 2870340 | 404121 | potassium voltage-gated channel, KQT-like subfamily, member 1                  |
| KCNQ1OT1      | chr11 | 2629557 | 2721228 | 91672  | KCNQ1 overlapping transcript 1                                                 |
| KCNQ1DN       | chr11 | 2891262 | 2893336 | 2075   | KCNQ1 downstream neighbor (non-protein coding)                                 |
| SLC22A18AS    | chr11 | 2909326 | 2925175 | 15850  | solute carrier family 22 (organic cation transporter), member 18 antisense     |
| SLC22A18      | chr11 | 2920950 | 2946476 | 25527  | solute carrier family 22, member 18                                            |
| ZNF195        | chr11 | 3379156 | 3400452 | 21297  | zinc finger protein 195                                                        |
| OR7E12P       | chr11 | 3411936 | 3413145 | 1210   | olfactory receptor, family 7, subfamily E, member 12 pseudogene                |
| TSSC2         | chr11 | 3402190 | 3430378 | 28189  | tumor suppressing subtransferable candidate 2 pseudogene                       |
| LOC650368     | chr11 | 3402190 | 3430378 | 28189  | tumor suppressing subtransferable candidate 2 pseudogene                       |
| AB231779      | chr11 | 3638461 | 3647749 | 9289   |                                                                                |
| TRPC2         | chr11 | 3647689 | 3658789 | 11101  | transient receptor potential cation channel, subfamily C, member 2, pseudogene |
| ART5          | chr11 | 3659735 | 3663546 | 3812   | ADP-ribosyltransferase 5                                                       |
| ART1          | chr11 | 3666360 | 3685646 | 19287  | ADP-ribosyltransferase 1                                                       |
| CHRNA10       | chr11 | 3686816 | 3692614 | 5799   | cholinergic receptor, nicotinic, alpha 10 (neuronal)                           |
| NUP98         | chr11 | 3696239 | 3819022 | 122784 | nucleoporin 98kDa                                                              |
| PGAP2         | chr11 | 3818953 | 3847601 | 28649  | post-GPI attachment to proteins 2                                              |
| RHOG          | chr11 | 3848207 | 3862213 | 14007  | ras homolog family member G                                                    |
| MIR4687       | chr11 | 3877291 | 3877371 | 81     | microRNA 4687                                                                  |
| STIM1         | chr11 | 3876932 | 4114440 | 237509 | stromal interaction molecule 1                                                 |
| RRM1          | chr11 | 4115923 | 4223883 | 107961 | ribonucleotide reductase M1                                                    |
| LOC100506082  | chr11 | 4208381 | 4223883 | 15503  | uncharacterized LOC100506082                                                   |
| OR52B4        | chr11 | 4388492 | 4389616 | 1125   | olfactory receptor, family 52, subfamily B, member 4                           |
| TRIM21        | chr11 | 4406126 | 4414926 | 8801   | tripartite motif containing 21                                                 |
| OR52K2        | chr11 | 4470524 | 4471591 | 1068   | olfactory receptor, family 52, subfamily K, member 2                           |
| OR52K1        | chr11 | 4510108 | 4511138 | 1031   | olfactory receptor, family 52, subfamily K, member 1                           |
| OR52M1        | chr11 | 4566420 | 4567374 | 955    | olfactory receptor, family 52, subfamily M, member 1                           |
| C11orf40      | chr11 | 4592652 | 4599050 | 6399   | chromosome 11 open reading frame 40                                            |
| OR52I2        | chr11 | 4608020 | 4609135 | 1116   | olfactory receptor, family 52, subfamily I, member 2                           |
| OR52I1        | chr11 | 4615268 | 4616243 | 976    | olfactory receptor, family 52, subfamily I, member 1                           |
| TRIM68        | chr11 | 4619901 | 4629489 | 9589   | tripartite motif containing 68                                                 |
| OR51D1        | chr11 | 4660944 | 4662068 | 1125   | olfactory receptor, family 51, subfamily D, member 1                           |
| OR51E1        | chr11 | 4665155 | 4676716 | 11562  | olfactory receptor, family 51, subfamily E, member 1                           |
| OR51E2        | chr11 | 4701400 | 4719076 | 17677  | olfactory receptor, family 51, subfamily E, member 2                           |
| OR51F1        | chr11 | 4790208 | 4791147 | 940    | olfactory receptor, family 51, subfamily F, member 1                           |
| OR52R1        | chr11 | 4824662 | 4825610 | 949    | olfactory receptor, family 52, subfamily R, member 1                           |
| OR51F2        | chr11 | 4842615 | 4843644 | 1030   | olfactory receptor, family 51, subfamily F, member 2                           |
| OR51S1        | chr11 | 4869466 | 4870438 | 973    | olfactory receptor, family 51, subfamily S, member 1                           |
| OR51T1        | chr11 | 4903048 | 4904113 | 1066   | olfactory receptor, family 51, subfamily T, member 1                           |
| OR51A7        | chr11 | 4928599 | 4929538 | 940    | olfactory receptor, family 51, subfamily A, member 7                           |
| OR51G2        | chr11 | 4935948 | 4936893 | 946    | olfactory receptor, family 51, subfamily G, member 2                           |
| OR51G1        | chr11 | 4944603 | 4945569 | 967    | olfactory receptor, family 51, subfamily G, member 1                           |
| OR51A4        | chr11 | 4967388 | 4968330 | 943    | olfactory receptor, family 51, subfamily A, member 4                           |
| OR51A2        | chr11 | 4976001 | 4976943 | 943    | olfactory receptor, family 51, subfamily A, member 2                           |
| MMP26         | chr11 | 5009423 | 5013659 | 4237   | matrix metalloproteinase 26                                                    |
| OR51L1        | chr11 | 5020212 | 5021160 | 949    | olfactory receptor, family 51, subfamily L, member 1                           |
| OR52J3        | chr11 | 5067755 | 5068691 | 937    | olfactory receptor, family 52, subfamily J, member 3                           |
| OR52E2        | chr11 | 5079879 | 5080857 | 979    | olfactory receptor, family 52, subfamily E, member 2                           |
| DQ656008      | chr11 | 5142384 | 5145743 | 3360   |                                                                                |
| OR52A5        | chr11 | 5152921 | 5153872 | 952    | olfactory receptor, family 52, subfamily A, member 5                           |
| OR52A1        | chr11 | 5172660 | 5173599 | 940    | olfactory receptor, family 52, subfamily A, member 1                           |
| OR52Z1        | chr11 | 5199340 | 5199783 | 444    | olfactory receptor, family 52, subfamily Z, member 1 (gene/pseudogene)         |
| OR51V1        | chr11 | 5220964 | 5221930 | 967    | olfactory receptor, family 51, subfamily V, member 1                           |
| CoTC_ribozyme | chr11 | 5245677 | 5245869 | 193    |                                                                                |
| DL074624      | chr11 | 5246721 | 5246744 | 24     |                                                                                |
| HBB           | chr11 | 5246695 | 5248301 | 1607   | hemoglobin, beta                                                               |
| HBD           | chr11 | 5254058 | 5255858 | 1801   | hypophosphatemic bone disease                                                  |
| HBBP1         | chr11 | 5263184 | 5264822 | 1639   | hemoglobin, beta pseudogene 1                                                  |
| BGLT3         | chr11 | 5265783 | 5266776 | 994    | beta globin locus transcript 3 (non-protein coding)                            |
| HBG1          | chr11 | 5269501 | 5271087 | 1587   | hemoglobin, gamma A                                                            |
| OR51B4        | chr11 | 5322243 | 5323176 | 934    | olfactory receptor, family 51, subfamily B, member 4                           |
| OR51B2        | chr11 | 5344527 | 5345582 | 1056   | olfactory receptor, family 51, subfamily B, member 2                           |
| OR51B6        | chr11 | 5372737 | 5373676 | 940    | olfactory receptor, family 51, subfamily B, member 6                           |
| HBE1          | chr11 | 5289579 | 5526882 | 237304 | hemoglobin, epsilon 1                                                          |
| OR51M1        | chr11 | 5410606 | 5411664 | 1059   | olfactory receptor, family 51, subfamily M, member 1                           |
| OR51Q1        | chr11 | 5443340 | 5444436 | 1097   | olfactory receptor, family 51, subfamily Q, member 1                           |
| OR51B5        | chr11 | 5362112 | 5526882 | 164771 | olfactory receptor, family 51, subfamily B, member 5                           |
| OR51I1        | chr11 | 5461771 | 5462783 | 1013   | olfactory receptor, family 51, subfamily I, member 1                           |
| HBG2          | chr11 | 5269501 | 5667011 | 397511 | hemoglobin, gamma G                                                            |
| OR51I2        | chr11 | 5474637 | 5475707 | 1071   | olfactory receptor, family 51, subfamily I, member 2                           |

|                  |       |         |         |        |                                                                |
|------------------|-------|---------|---------|--------|----------------------------------------------------------------|
| OR52D1           | chr11 | 5509914 | 5510978 | 1065   | olfactory receptor, family 52, subfamily D, member 1           |
| UBQLN3           | chr11 | 5528529 | 5531153 | 2625   | ubiquilin 3                                                    |
| UBQLNL           | chr11 | 5535622 | 5537956 | 2335   | ubiquilin-like                                                 |
| OR52H1           | chr11 | 5565790 | 5566753 | 964    | olfactory receptor, family 52, subfamily H, member 1           |
| OR52B6           | chr11 | 5602106 | 5603114 | 1009   | olfactory receptor, family 52, subfamily B, member 6           |
| TRIM6            | chr11 | 5617330 | 5634188 | 16859  | tripartite motif containing 6                                  |
| TRIM6-TRIM34     | chr11 | 5617864 | 5665625 | 47762  | TRIM6-TRIM34 readthrough                                       |
| TRIM34           | chr11 | 5641173 | 5665625 | 24453  | tripartite motif containing 34                                 |
| TRIPartite motif | chr11 | 5686441 | 5687610 | 1170   |                                                                |
| OR56B1           | chr11 | 5757677 | 5758768 | 1092   | olfactory receptor, family 56, subfamily B, member 1           |
| TRIM22           | chr11 | 5710816 | 5821759 | 110944 | tripartite motif containing 22                                 |
| OR52N4           | chr11 | 5775922 | 5776959 | 1038   | olfactory receptor, family 52, subfamily N, member 4           |
| OR52N5           | chr11 | 5798863 | 5799897 | 1035   | olfactory receptor, family 52, subfamily N, member 5           |
| OR52N1           | chr11 | 5809083 | 5810046 | 964    | olfactory receptor, family 52, subfamily N, member 1           |
| TRIM5            | chr11 | 5684424 | 5959849 | 275426 | tripartite motif containing 5                                  |
| OR52N2           | chr11 | 5841565 | 5842531 | 967    | olfactory receptor, family 52, subfamily N, member 2           |
| OR52E6           | chr11 | 5862185 | 5863127 | 943    | olfactory receptor, family 52, subfamily E, member 6           |
| OR52E8           | chr11 | 5877978 | 5878932 | 955    | olfactory receptor, family 52, subfamily E, member 8           |
| OR52E4           | chr11 | 5905522 | 5906461 | 940    | olfactory receptor, family 52, subfamily E, member 4           |
| OR56A3           | chr11 | 5968576 | 5969524 | 949    | olfactory receptor, family 56, subfamily A, member 3           |
| OR56A5           | chr11 | 5988782 | 5989724 | 943    | olfactory receptor, family 56, subfamily A, member 5           |
| OR52L1           | chr11 | 6007121 | 6008215 | 1095   | olfactory receptor, family 52, subfamily L, member 1           |
| OR56A4           | chr11 | 6023280 | 6024378 | 1099   | olfactory receptor, family 56, subfamily A, member 4           |
| OR56A1           | chr11 | 6047900 | 6048971 | 1072   | olfactory receptor, family 56, subfamily A, member 1           |
| OR56B4           | chr11 | 6129008 | 6129968 | 961    | olfactory receptor, family 56, subfamily B, member 4           |
| OLFR690          | chr11 | 6172912 | 6173819 | 908    |                                                                |
| OR52B2           | chr11 | 6190584 | 6191556 | 973    | olfactory receptor, family 52, subfamily B, member 2           |
| OR52W1           | chr11 | 6220453 | 6221416 | 964    | olfactory receptor, family 52, subfamily W, member 1           |
| C11orf42         | chr11 | 6226797 | 6232365 | 5569   | chromosome 11 open reading frame 42                            |
| FAM160A2         | chr11 | 6232563 | 6255941 | 23379  | family with sequence similarity 160, member A2                 |
| CNGA4            | chr11 | 6255994 | 6265709 | 9716   | cyclic nucleotide gated channel alpha 4                        |
| CCKBR            | chr11 | 6280903 | 6293357 | 12455  | cholecystokinin B receptor                                     |
| PRKCDBP          | chr11 | 6340175 | 6341740 | 1566   | protein kinase C, delta binding protein                        |
| DNHD1            | chr11 | 6518525 | 6593254 | 74730  | dynein heavy chain domain 1                                    |
| GVINP1           | chr11 | 6734380 | 6767670 | 33291  | GTPase, very large interferon inducible pseudogene 1           |
| OR2AG2           | chr11 | 6789237 | 6790188 | 952    | olfactory receptor, family 2, subfamily AG, member 2           |
| OR2AG1           | chr11 | 6806247 | 6807245 | 999    | olfactory receptor, family 2, subfamily AG, member 1           |
| OR6A2            | chr11 | 6815755 | 6817139 | 1385   | olfactory receptor, family 6, subfamily A, member 2            |
| OR10A5           | chr11 | 6866913 | 6867867 | 955    | olfactory receptor, family 10, subfamily A, member 5           |
| OR10A2           | chr11 | 6890985 | 6891897 | 913    | olfactory receptor, family 10, subfamily A, member 2           |
| OR10A4           | chr11 | 6897855 | 6898850 | 996    | olfactory receptor, family 10, subfamily A, member 4           |
| OR2D2            | chr11 | 6912804 | 6913731 | 928    | olfactory receptor, family 2, subfamily D, member 2            |
| OR2D3            | chr11 | 6942232 | 6943225 | 994    | olfactory receptor, family 2, subfamily D, member 3            |
| ZNF215           | chr11 | 6947653 | 7005861 | 58209  | zinc finger protein 215                                        |
| ZNF214           | chr11 | 7020548 | 7041586 | 21039  | zinc finger protein 214                                        |
| NLRP14           | chr11 | 7041699 | 7092757 | 51059  | NLR family, pyrin domain containing 14                         |
| JB175177         | chr11 | 7078055 | 7078075 | 21     |                                                                |
| RBMXL2           | chr11 | 7110164 | 7112379 | 2216   | RNA binding motif protein, X-linked-like 2                     |
| SYT9             | chr11 | 7260008 | 7490276 | 230269 | synaptotagmin IX                                               |
| BC040358         | chr11 | 7458867 | 7487042 | 28176  |                                                                |
| LOC100506258     | chr11 | 7458867 | 7487066 | 28200  | uncharacterized LOC100506258                                   |
| AK128569         | chr11 | 7448496 | 7526103 | 77608  |                                                                |
| OLFML1           | chr11 | 7506599 | 7532606 | 26008  | olfactomedin-like 1                                            |
| PPFIBP2          | chr11 | 7534995 | 7678358 | 143364 | PTPRF interacting protein, binding protein 2 (liprin beta 2)   |
| CYB5R2           | chr11 | 7686325 | 7694994 | 8670   | cytochrome b5 reductase 2                                      |
| OVCH2            | chr11 | 7711154 | 7727941 | 16788  | ovochoymase 2 (gene/pseudogene)                                |
| PJCG1            | chr11 | 7794439 | 7795197 | 759    |                                                                |
| OR5P2            | chr11 | 7817520 | 7818489 | 970    | olfactory receptor, family 5, subfamily P, member 2            |
| OR5P3            | chr11 | 7846583 | 7847519 | 937    | olfactory receptor, family 5, subfamily P, member 3            |
| OR5E1P           | chr11 | 7870597 | 7871118 | 522    | olfactory receptor, family 5, subfamily E, member 1 pseudogene |
| LOC283299        | chr11 | 7872297 | 7927502 | 55206  | uncharacterized LOC283299                                      |
| U6               | chr11 | 7910728 | 7910826 | 99     | RNA, U6 small nuclear 50, pseudogene                           |
| OR10A6           | chr11 | 7949264 | 7950209 | 946    | olfactory receptor, family 10, subfamily A, member 6           |
| OR10A3           | chr11 | 7960122 | 7961067 | 946    | olfactory receptor, family 10, subfamily A, member 3           |
| NLRP10           | chr11 | 7981155 | 7985059 | 3905   | NLR family, pyrin domain containing 10                         |
| EIF3F            | chr11 | 8008444 | 8017719 | 9276   | eukaryotic translation initiation factor 3, subunit F          |
| BC027619         | chr11 | 8032824 | 8038036 | 5213   |                                                                |
| CASC23           | chr11 | 8032824 | 8038056 | 5233   | cancer susceptibility candidate 23 (non-protein coding)        |
| TUB              | chr11 | 8040790 | 8127654 | 86865  | tubby bipartite transcription factor                           |
| TUB-AS1          | chr11 | 8081584 | 8090920 | 9337   | TUB antisense RNA 1                                            |
| AK055772         | chr11 | 8081584 | 8090920 | 9337   |                                                                |
| RIC3             | chr11 | 8127596 | 8190590 | 62995  | RIC3 acetylcholine receptor chaperone                          |
| LMO1             | chr11 | 8245850 | 8290182 | 44333  | LIM domain only 1 (rhombotin 1)                                |
| STK33            | chr11 | 8413412 | 8615836 | 202425 | serine/threonine kinase 33                                     |
| SCARNA20         | chr11 | 8576562 | 8576693 | 132    | small Cajal body-specific RNA 20                               |
| TRIM66           | chr11 | 8633583 | 8693413 | 59831  | tripartite motif containing 66                                 |
| BC068088         | chr11 | 8693132 | 8701271 | 8140   |                                                                |
| SNORA3           | chr11 | 8705773 | 8705903 | 131    | small nucleolar RNA, H/ACA box 45A                             |
| SNORA45A         | chr11 | 8705773 | 8705903 | 131    | small nucleolar RNA, H/ACA box 45A                             |
| SNORA45          | chr11 | 8706985 | 8707116 | 132    | small nucleolar RNA, H/ACA box 45B                             |



|              |       |         |         |        |                                                              |
|--------------|-------|---------|---------|--------|--------------------------------------------------------------|
| SNORA45B     | chr11 | 8706985 | 8707116 | 132    | small nucleolar RNA, H/ACA box 45B                           |
| RPL27A       | chr11 | 8703994 | 8711419 | 7426   | ribosomal protein L27a                                       |
| LOC102724784 | chr11 | 8790324 | 8831823 | 41500  | uncharacterized LOC102724784                                 |
| ST5          | chr11 | 8714898 | 8932498 | 217601 | suppression of tumorigenicity 5                              |
| 5S_rRNA      | chr11 | 8866809 | 8866905 | 97     |                                                              |
| AKIP1        | chr11 | 8932700 | 8941626 | 8927   | A kinase (PRKA) interacting protein 1                        |
| C11orf16     | chr11 | 8941622 | 8954553 | 12932  | chromosome 11 open reading frame 16                          |
| ASCL3        | chr11 | 8959118 | 8964580 | 5463   | achaete-scute family bHLH transcription factor 3             |
| TMEM9B       | chr11 | 8968747 | 8986558 | 17812  | TMEM9 domain family, member B                                |
| TMEM9B-AS1   | chr11 | 8986221 | 8997830 | 11610  | TMEM9B antisense RNA 1                                       |
| NRIP3        | chr11 | 9002122 | 9025596 | 23475  | nuclear receptor interacting protein 3                       |
| SCUBE2       | chr11 | 9041046 | 9113150 | 72105  | signal peptide, CUB domain, EGF-like 2                       |
| MIR5691      | chr11 | 9111858 | 9111926 | 69     | microRNA 5691                                                |
| KRT8P41      | chr11 | 9115909 | 9117737 | 1829   | keratin 8 pseudogene 41                                      |
| DENND5A      | chr11 | 9160374 | 9286873 | 126500 | DENN/MADD domain containing 5A                               |
| TRNA_Leu     | chr11 | 9296789 | 9296863 | 75     |                                                              |
| TMEM41B      | chr11 | 9302200 | 9336315 | 34116  | transmembrane protein 41B                                    |
| F379         | chr12 | 67610   | 69070   | 1461   | chromosome 1 F379 retina specific protein                    |
| FAM138D      | chr12 | 67606   | 69079   | 1474   | family with sequence similarity 138, member D                |
| DKFZp434K13c | chr12 | 74271   | 87703   | 13433  | hypothetical protein LOC58481                                |
| LOC100288778 | chr12 | 73879   | 91263   | 17385  | WAS protein family homolog 1 pseudogene                      |
| DDX11L11     | chr12 | 91352   | 93018   | 1667   | DEAD/H (Asp-Glu-Ala-Asp/His) box helicase 11 like 11         |
| IQSEC3       | chr12 | 176048  | 287625  | 111578 | IQ motif and Sec7 domain 3                                   |
| KDM5A        | chr12 | 389222  | 498621  | 109400 | lysine (K)-specific demethylase 5A                           |
| CCDC77       | chr12 | 498515  | 551806  | 53292  | coiled-coil domain containing 77                             |
| B4GALNT3     | chr12 | 569542  | 671058  | 101517 | beta-1,4-N-acetyl-galactosaminyl transferase 3               |
| U4atac       | chr12 | 890298  | 890424  | 127    |                                                              |
| WNK1         | chr12 | 862088  | 1020618 | 158531 | WNK lysine deficient protein kinase 1                        |
| HSN2         | chr12 | 976959  | 978360  | 1402   | hereditary sensory neuropathy, type II                       |
| AK128619     | chr12 | 1011721 | 1016190 | 4470   |                                                              |
| RAD52        | chr12 | 1020901 | 1099219 | 78319  | RAD52 homolog (S. cerevisiae)                                |
| BC039168     | chr12 | 1084462 | 1099219 | 14758  |                                                              |
| ERC1         | chr12 | 1100373 | 1605099 | 504727 | ELKS/RAB6-interacting/CAST family member 1                   |
| LINC00942    | chr12 | 1609656 | 1613590 | 3935   | long intergenic non-protein coding RNA 942                   |
| AX746535     | chr12 | 1615335 | 1616484 | 1150   |                                                              |
| FBXL14       | chr12 | 1675158 | 1703331 | 28174  | F-box and leucine-rich repeat protein 14                     |
| WNT5B        | chr12 | 1683822 | 1756378 | 72557  | wingless-type MMTV integration site family, member 5B        |
| MIR3649      | chr12 | 1769480 | 1769546 | 67     | microRNA 3649                                                |
| ADIPOR2      | chr12 | 1800246 | 1897845 | 97600  | adiponectin receptor 2                                       |
| LRTM2        | chr12 | 1929432 | 1945918 | 16487  | leucine-rich repeats and transmembrane domains 2             |
| CACNA2D4     | chr12 | 1901122 | 2027870 | 126749 | calcium channel, voltage-dependent, alpha 2/delta subunit 4  |
| LINC00940    | chr12 | 2038367 | 2045742 | 7376   | long intergenic non-protein coding RNA 940                   |
| CACNA1C      | chr12 | 2080228 | 2080366 | 139    | calcium channel, voltage-dependent, L type, alpha 1C subunit |
| DCP1B        | chr12 | 2050756 | 2113677 | 62922  | decapping mRNA 1B                                            |
| CACNA1C-IT2  | chr12 | 2157517 | 2158628 | 1112   | CACNA1C intronic transcript 2 (non-protein coding)           |
| AK308652     | chr12 | 2229490 | 2229863 | 374    |                                                              |
| CACNA1C-AS4  | chr12 | 2329702 | 2332647 | 2946   | CACNA1C antisense RNA 4                                      |
| CACNA1C-IT3  | chr12 | 2378941 | 2397911 | 18971  | CACNA1C intronic transcript 3 (non-protein coding)           |
| CACNA1C      | chr12 | 2162415 | 2807115 | 644701 | calcium channel, voltage-dependent, L type, alpha 1C subunit |
| LOC100507424 | chr12 | 2945981 | 2968961 | 22981  | uncharacterized LOC100507424                                 |
| FOXM1        | chr12 | 2966846 | 2986321 | 19476  | forkhead box M1                                              |
| RHNO1        | chr12 | 2985423 | 2998691 | 13269  | RAD9-HUS1-RAD1 interacting nuclear orphan 1                  |
| TULP3        | chr12 | 2986364 | 3050306 | 63943  | tubby like protein 3                                         |
| TEAD4        | chr12 | 3068477 | 3149842 | 81366  | TEA domain family member 4                                   |
| TSPAN9       | chr12 | 3186520 | 3395730 | 209211 | tetraspanin 9                                                |
| AK056228     | chr12 | 3405367 | 3409390 | 4024   |                                                              |
| AK095365     | chr12 | 3427883 | 3434509 | 6627   |                                                              |
| BC047090     | chr12 | 3445188 | 3445980 | 793    |                                                              |
| DQ574680     | chr12 | 3553532 | 3553563 | 32     |                                                              |
| DQ597527     | chr12 | 3565649 | 3565688 | 40     |                                                              |
| DQ591569     | chr12 | 3567721 | 3570074 | 2354   |                                                              |
| DQ590472     | chr12 | 3575436 | 3575477 | 42     |                                                              |
| DQ590289     | chr12 | 3579507 | 3579548 | 42     |                                                              |
| DQ591331     | chr12 | 3579697 | 3579731 | 35     |                                                              |
| DQ599425     | chr12 | 3580294 | 3580328 | 35     |                                                              |
| DQ584103     | chr12 | 3581012 | 3581048 | 37     |                                                              |
| DQ583990     | chr12 | 3581870 | 3581899 | 30     |                                                              |
| DQ573743     | chr12 | 3584206 | 3584271 | 66     |                                                              |
| DQ594563     | chr12 | 3584318 | 3584352 | 35     |                                                              |
| DQ601344     | chr12 | 3584494 | 3584528 | 35     |                                                              |
| DQ600002     | chr12 | 3585019 | 3585049 | 31     |                                                              |
| DQ570426     | chr12 | 3585610 | 3585642 | 33     |                                                              |
| DQ589173     | chr12 | 3586923 | 3586953 | 31     |                                                              |
| DQ587099     | chr12 | 3586955 | 3586984 | 30     |                                                              |
| DQ594785     | chr12 | 3587759 | 3587799 | 41     |                                                              |
| DQ588300     | chr12 | 3590068 | 3590097 | 30     |                                                              |
| DQ596092     | chr12 | 3590833 | 3590862 | 30     |                                                              |
| DQ583138     | chr12 | 3591678 | 3591708 | 31     |                                                              |
| DQ579489     | chr12 | 3592511 | 3592544 | 34     |                                                              |
| PRMT8        | chr12 | 3490514 | 3703138 | 212625 | protein arginine methyltransferase 8                         |

|              |       |         |         |        |                                                                                                     |
|--------------|-------|---------|---------|--------|-----------------------------------------------------------------------------------------------------|
| AK125333     | chr12 | 3592879 | 3601985 | 9107   |                                                                                                     |
| EFCAB4B      | chr12 | 3716317 | 3862366 | 146050 |                                                                                                     |
| CRACR2A      | chr12 | 3724493 | 3862366 | 137874 | calcium release activated channel regulator 2A                                                      |
| PARP11       | chr12 | 3918026 | 3982614 | 64589  | poly (ADP-ribose) polymerase family, member 11                                                      |
| CCND2-AS1    | chr12 | 4357932 | 4385350 | 27419  | CCND2 antisense RNA 1                                                                               |
| CCND2        | chr12 | 4382901 | 4414522 | 31622  | cyclin D2                                                                                           |
| C12orf5      | chr12 | 4430358 | 4469190 | 38833  | chromosome 12 open reading frame 5                                                                  |
| FGF23        | chr12 | 4477392 | 4488894 | 11503  | fibroblast growth factor 23                                                                         |
| FGF6         | chr12 | 4543307 | 4554780 | 11474  | fibroblast growth factor 6                                                                          |
| C12orf4      | chr12 | 4596900 | 4647637 | 50738  | chromosome 12 open reading frame 4                                                                  |
| RAD51AP1     | chr12 | 4647949 | 4669213 | 21265  | RAD51 associated protein 1                                                                          |
| DYRK4        | chr12 | 4671369 | 4723054 | 51686  | dual-specificity tyrosine-(Y)-phosphorylation regulated kinase 4                                    |
| AKAP3        | chr12 | 4724673 | 4758213 | 33541  | A kinase (PRKA) anchor protein 3                                                                    |
| NDUFA9       | chr12 | 4758263 | 4796720 | 38458  | NADH dehydrogenase (ubiquinone) 1 alpha subcomplex, 9, 39kDa                                        |
| LOC101929549 | chr12 | 4809582 | 4829268 | 19687  | uncharacterized LOC101929549                                                                        |
| GALNT8       | chr12 | 4829751 | 4881892 | 52142  | N-acetylgalactosaminyltransferase 8                                                                 |
| KCNA6        | chr12 | 4918341 | 4960278 | 41938  | potassium voltage-gated channel, shaker-related subfamily, member 6                                 |
| KCNA1        | chr12 | 5019072 | 5027422 | 8351   | potassium voltage-gated channel, shaker-related subfamily, member 1 (episodic ataxia with myokymia) |
| KCNA5        | chr12 | 5153084 | 5155954 | 2871   | potassium voltage-gated channel, shaker-related subfamily, member 5                                 |
| LOC101929584 | chr12 | 5343161 | 5352317 | 9157   | uncharacterized LOC101929584                                                                        |
| BC031884     | chr12 | 5347213 | 5352317 | 5105   |                                                                                                     |
| NTF3         | chr12 | 5541279 | 5604465 | 63187  | neurotrophin 3                                                                                      |
| ANO2         | chr12 | 5671816 | 6055398 | 383583 | anoctamin 2, calcium activated chloride channel                                                     |
| VWF          | chr12 | 6058039 | 6233836 | 175798 | von Willebrand factor                                                                               |
| Metazoa_SRP  | chr12 | 6204863 | 6205136 | 274    |                                                                                                     |
| CD9          | chr12 | 6309481 | 6347437 | 37957  | CD9 molecule                                                                                        |
| PLEKHG6      | chr12 | 6419601 | 6437672 | 18072  | pleckstrin homology domain containing, family G (with RhoGef domain) member 6                       |
| TNFRSF1A     | chr12 | 6437922 | 6451283 | 13362  | tumor necrosis factor receptor superfamily, member 1A                                               |
| SCNN1A       | chr12 | 6456008 | 6486523 | 30516  | sodium channel, non-voltage-gated 1 alpha subunit                                                   |
| LTBR         | chr12 | 6484533 | 6500737 | 16205  | lymphotoxin beta receptor (TNFR superfamily, member 3)                                              |
| CD27-AS1     | chr12 | 6548166 | 6560683 | 12518  | CD27 antisense RNA 1                                                                                |
| CD27         | chr12 | 6554050 | 6560884 | 6835   | CD27 molecule                                                                                       |
| TAPBPL       | chr12 | 6561176 | 6575601 | 14426  | TAP binding protein-like                                                                            |
| VAMP1        | chr12 | 6571403 | 6580065 | 8663   | vesicle-associated membrane protein 1 (synaptobrevin 1)                                             |
| MRPL51       | chr12 | 6601315 | 6602471 | 1157   | mitochondrial ribosomal protein L51                                                                 |
| SCARNA10     | chr12 | 6619387 | 6619717 | 331    | small Cajal body-specific RNA 10                                                                    |
| NCAPD2       | chr12 | 6603297 | 6641132 | 37836  | non-SMC condensin I complex, subunit D2                                                             |
| GAPDH        | chr12 | 6643570 | 6647541 | 3972   | glyceraldehyde-3-phosphate dehydrogenase                                                            |
| DL491527     | chr12 | 6645665 | 6645791 | 127    |                                                                                                     |
| IFFO1        | chr12 | 6647538 | 6665249 | 17712  | intermediate filament family orphan 1                                                               |
| NOP2         | chr12 | 6666035 | 6677498 | 11464  | NOP2 nucleolar protein                                                                              |
| SCARNA11     | chr12 | 6690638 | 6690775 | 138    | small Cajal body-specific RNA 11                                                                    |
| AK096395     | chr12 | 6687787 | 6693905 | 6119   |                                                                                                     |
| CHD4         | chr12 | 6679247 | 6716599 | 37353  | chromodomain helicase DNA binding protein 4                                                         |
| LPAR5        | chr12 | 6728000 | 6748203 | 20204  | lysophosphatidic acid receptor 5                                                                    |
| ACRBP        | chr12 | 6747241 | 6756580 | 9340   | acrosin binding protein                                                                             |
| ING4         | chr12 | 6759703 | 6772308 | 12606  | inhibitor of growth family, member 4                                                                |
| ZNF384       | chr12 | 6775642 | 6798738 | 23097  | zinc finger protein 384                                                                             |
| PIANP        | chr12 | 6802956 | 6810009 | 7054   | PILR alpha associated neural protein                                                                |
| COPS7A       | chr12 | 6833149 | 6841041 | 7893   | COP9 signalosome subunit 7A                                                                         |
| MLF2         | chr12 | 6857157 | 6876641 | 19485  | myeloid leukemia factor 2                                                                           |
| PTMS         | chr12 | 6875540 | 6880118 | 4579   | parathyrosin                                                                                        |
| LAG3         | chr12 | 6881669 | 6887621 | 5953   | lymphocyte-activation gene 3                                                                        |
| CD4          | chr12 | 6898637 | 6929976 | 31340  | CD4 molecule                                                                                        |
| GPR162       | chr12 | 6930962 | 6939175 | 8214   | G protein-coupled receptor 162                                                                      |
| LEPREL2      | chr12 | 6937537 | 6949018 | 11482  | leprecan-like 2                                                                                     |
| GNB3         | chr12 | 6949117 | 6956559 | 7443   | guanine nucleotide binding protein (G protein), beta polypeptide 3                                  |
| AK097957     | chr12 | 6954022 | 6957970 | 3949   |                                                                                                     |
| CDCA3        | chr12 | 6953962 | 6961230 | 7269   | cell division cycle associated 3                                                                    |
| USP5         | chr12 | 6961284 | 6975795 | 14512  | ubiquitin specific peptidase 5 (isopeptidase T)                                                     |
| TPI1         | chr12 | 6976583 | 6980110 | 3528   | triosephosphate isomerase 1                                                                         |
| SPSB2        | chr12 | 6980099 | 6982521 | 2423   | splA/ryanodine receptor domain and SOCS box containing 2                                            |
| RRPL13L      | chr12 | 6982789 | 6993768 | 10980  |                                                                                                     |
| RPL13P5      | chr12 | 6993144 | 6993768 | 625    | ribosomal protein L13 pseudogene 5                                                                  |
| DSTNP2       | chr12 | 6993845 | 6994950 | 1106   | destrin (actin depolymerizing factor) pseudogene 2                                                  |
| LRRC23       | chr12 | 7013896 | 7023406 | 9511   | leucine rich repeat containing 23                                                                   |
| ENO2         | chr12 | 7023613 | 7032859 | 9247   | enolase 2 (gamma, neuronal)                                                                         |
| ATN1         | chr12 | 7033625 | 7051484 | 17860  | atrophin 1                                                                                          |
| C12orf57     | chr12 | 7052140 | 7055166 | 3027   | chromosome 12 open reading frame 57                                                                 |
| PTPN6        | chr12 | 7055739 | 7070479 | 14741  | protein tyrosine phosphatase, non-receptor type 6                                                   |
| MIR200C      | chr12 | 7072861 | 7072929 | 69     | microRNA 200c                                                                                       |
| MIR141       | chr12 | 7073259 | 7073354 | 96     | microRNA 141                                                                                        |
| SCARNA12     | chr12 | 7076499 | 7076769 | 271    | small Cajal body-specific RNA 12                                                                    |
| PHB2         | chr12 | 7074514 | 7079916 | 5403   | prohibitin 2                                                                                        |
| EMG1         | chr12 | 7079943 | 7105520 | 25578  | EMG1 N1-specific pseudouridine methyltransferase                                                    |
| LPCAT3       | chr12 | 7085346 | 7125842 | 40497  | lysophosphatidylcholine acyltransferase 3                                                           |
| C1S          | chr12 | 7096259 | 7178335 | 82077  | complement component 1, s subcomponent                                                              |
| C1R          | chr12 | 7187514 | 7245043 | 57530  | complement component 1, r subcomponent                                                              |
| C1RL         | chr12 | 7247145 | 7261874 | 14730  | complement component 1, r subcomponent-like                                                         |
| C1RL-AS1     | chr12 | 7260903 | 7274447 | 13545  | C1RL antisense RNA 1                                                                                |

|              |       |          |          |         |                                                                      |
|--------------|-------|----------|----------|---------|----------------------------------------------------------------------|
| RBP5         | chr12 | 7276279  | 7281466  | 5188    | retinol binding protein 5, cellular                                  |
| CLSTN3       | chr12 | 7282966  | 7311530  | 28565   | calsyntenin 3                                                        |
| PEX5         | chr12 | 7341758  | 7371169  | 29412   | peroxisomal biogenesis factor 5                                      |
| ACSM4        | chr12 | 7456927  | 7480969  | 24043   | acyl-CoA synthetase medium-chain family member 4                     |
| CD163L1      | chr12 | 7507555  | 7596781  | 7596781 | CD163 molecule-like 1                                                |
| CD163        | chr12 | 7623411  | 7656414  | 33004   | CD163 molecule                                                       |
| APOBEC1      | chr12 | 7801995  | 7818502  | 16508   | apolipoprotein B mRNA editing enzyme, catalytic polypeptide 1        |
| GDF3         | chr12 | 7842380  | 7848360  | 5981    | growth differentiation factor 3                                      |
| DPPA3        | chr12 | 7864088  | 7870152  | 6065    | developmental pluripotency associated 3                              |
| CLEC4C       | chr12 | 7882010  | 7902069  | 20060   | C-type lectin domain family 4, member C                              |
| NANOGNB      | chr12 | 7917811  | 7926717  | 8907    | NANOG neighbor homeobox                                              |
| NANOG        | chr12 | 7941991  | 7948657  | 6667    | Nanog homeobox                                                       |
| Y_RNA        | chr12 | 7999883  | 7999978  | 96      |                                                                      |
| SLC2A14      | chr12 | 7965107  | 8043792  | 78686   | solute carrier family 2 (facilitated glucose transporter), member 14 |
| CLEC4A       | chr12 | 8276227  | 8291203  | 14977   | C-type lectin domain family 4, member A                              |
| POU5F1P3     | chr12 | 8286364  | 8287448  | 1085    | POU class 5 homeobox 1 pseudogene 3                                  |
| ZNF705A      | chr12 | 8325149  | 8332642  | 7494    | zinc finger protein 705A                                             |
| FAM66C       | chr12 | 8332804  | 8368747  | 35944   | family with sequence similarity 66, member C                         |
| FAM90A1      | chr12 | 8373855  | 8380214  | 6360    | family with sequence similarity 90, member A1                        |
| FAM86FP      | chr12 | 8383644  | 8395542  | 11899   | family with sequence similarity 86, member A pseudogene              |
| LOC101927905 | chr12 | 8388010  | 8395160  | 7151    | uncharacterized LOC101927905                                         |
| LINC00937    | chr12 | 8509559  | 8549399  | 39841   | long intergenic non-protein coding RNA 937                           |
| CLEC6A       | chr12 | 8608590  | 8630926  | 22337   | C-type lectin domain family 6, member A                              |
| CLEC4D       | chr12 | 8666135  | 8674960  | 8826    | C-type lectin domain family 4, member D                              |
| CLEC4E       | chr12 | 8685900  | 8693558  | 7659    | C-type lectin domain family 4, member E                              |
| AICDA        | chr12 | 8754761  | 8765442  | 10682   | activation-induced cytidine deaminase                                |
| MFAP5        | chr12 | 8798538  | 8815484  | 16947   | microfibrillar associated protein 5                                  |
| RIMKLB       | chr12 | 8834272  | 8935694  | 101423  | ribosomal modification protein rimK-like family member B             |
| A2ML1        | chr12 | 8975149  | 9039597  | 64449   | alpha-2-macroglobulin-like 1                                         |
| PHC1         | chr12 | 9067315  | 9094060  | 26746   | polyhomeotic homolog 1 (Drosophila)                                  |
| M6PR         | chr12 | 9092956  | 9102357  | 9402    | mannose-6-phosphate receptor (cation dependent)                      |
| KLRG1        | chr12 | 9142220  | 9163340  | 21121   | killer cell lectin-like receptor subfamily G, member 1               |
| LINC00612    | chr12 | 9208184  | 9217666  | 9483    | long intergenic non-protein coding RNA 612                           |
| A2M-AS1      | chr12 | 9217772  | 9220651  | 2880    | A2M antisense RNA 1 (head to head)                                   |
| A2M          | chr12 | 9220303  | 9268558  | 48256   | alpha-2-macroglobulin                                                |
| JB175316     | chr12 | 9280497  | 9280518  | 22      |                                                                      |
| PZP          | chr12 | 9301435  | 9360966  | 59532   | pregnancy-zone protein                                               |
| A2MP1        | chr12 | 9381128  | 9386803  | 5676    | alpha-2-macroglobulin pseudogene 1                                   |
| MIR1244-1    | chr12 | 9392065  | 9392147  | 83      | microRNA 1244-1                                                      |
| MIR1244-2    | chr12 | 9392065  | 9392147  | 83      | microRNA 1244-2                                                      |
| MIR1244-3    | chr12 | 9392065  | 9392147  | 83      | microRNA 1244-3                                                      |
| LINC00987    | chr12 | 9392598  | 9395645  | 3048    | long intergenic non-protein coding RNA 987                           |
| LOC100499405 | chr12 | 9392598  | 9395645  | 3048    | long intergenic non-protein coding RNA 987                           |
| SNORA75      | chr12 | 9439268  | 9439418  | 151     | small nucleolar RNA, H/ACA box 75                                    |
| LOC642846    | chr12 | 9436252  | 9466684  | 30433   | DEAD/H (Asp-Glu-Ala-Asp/His) box polypeptide 11-like                 |
| DQ582774     | chr12 | 9481705  | 9481733  | 29      |                                                                      |
| DQ586985     | chr12 | 9481920  | 9481986  | 67      |                                                                      |
| DQ577612     | chr12 | 9485756  | 9485790  | 35      |                                                                      |
| DQ586485     | chr12 | 9488358  | 9488396  | 39      |                                                                      |
| DQ577180     | chr12 | 9488431  | 9488461  | 31      |                                                                      |
| DQ585706     | chr12 | 9488849  | 9488879  | 31      |                                                                      |
| DQ575612     | chr12 | 9492398  | 9492435  | 38      |                                                                      |
| DQ592342     | chr12 | 9499998  | 9500028  | 31      |                                                                      |
| LOC10192803C | chr12 | 9524377  | 9534018  | 9642    | uncharacterized LOC101928030                                         |
| LOC101930452 | chr12 | 9520059  | 9550213  | 30155   | uncharacterized LOC101930452                                         |
| DQ599803     | chr12 | 9555037  | 9555064  | 28      |                                                                      |
| DDX12P       | chr12 | 9570286  | 9600768  | 30483   | DEAD/H (Asp-Glu-Ala-Asp/His) box polypeptide 12, pseudogene          |
| SNORA75      | chr12 | 9597653  | 9597801  | 149     | small nucleolar RNA, H/ACA box 75                                    |
| BX647938     | chr12 | 9709909  | 9728864  | 18956   |                                                                      |
| KLRB1        | chr12 | 9747869  | 9760497  | 12629   | killer cell lectin-like receptor subfamily B, member 1               |
| LOC374443    | chr12 | 9769879  | 9811010  | 41132   | C-type lectin domain family 2, member D pseudogene                   |
| CLEC2D       | chr12 | 9822303  | 9852151  | 29849   | C-type lectin domain family 2, member D                              |
| CLECL1       | chr12 | 9868455  | 9885895  | 17441   | C-type lectin-like 1                                                 |
| CD69         | chr12 | 9905081  | 9913497  | 8417    | CD69 molecule                                                        |
| KLRF1        | chr12 | 9980076  | 9997603  | 17528   | killer cell lectin-like receptor subfamily F, member 1               |
| CLEC2B       | chr12 | 10004967 | 10022458 | 17492   | C-type lectin domain family 2, member B                              |
| KLRF2        | chr12 | 10034087 | 10048432 | 14346   | killer cell lectin-like receptor subfamily F, member 2               |
| CLEC2A       | chr12 | 10051271 | 10084980 | 33710   | C-type lectin domain family 2, member A                              |
| LOC100506155 | chr12 | 10089177 | 10096094 | 6918    | uncharacterized LOC100506159                                         |
| CLEC12A      | chr12 | 10103914 | 10138194 | 34281   | C-type lectin domain family 12, member A                             |
| CLEC1B       | chr12 | 10145661 | 10151899 | 6239    | C-type lectin domain family 1, member B                              |
| CLEC12B      | chr12 | 10163230 | 10171399 | 8170    | C-type lectin domain family 12, member B                             |
| LOC10272402C | chr12 | 10167950 | 10183205 | 15256   | uncharacterized LOC102724020                                         |
| CLEC9A       | chr12 | 10183275 | 10218565 | 35291   | C-type lectin domain family 9, member A                              |
| CLEC1A       | chr12 | 10222152 | 10251664 | 29513   | C-type lectin domain family 1, member A                              |
| CLEC7A       | chr12 | 10269375 | 10282868 | 13494   | C-type lectin domain family 7, member A                              |
| QLR1         | chr12 | 10310898 | 10324790 | 13893   | oxidized low density lipoprotein (lectin-like) receptor 1            |
| GABARAPL1    | chr12 | 10365488 | 10375724 | 10237   | GABA(A) receptor-associated protein like 1                           |
| KLRD1        | chr12 | 10457049 | 10469850 | 12802   | killer cell lectin-like receptor subfamily D, member 1               |
| LOC10192810C | chr12 | 10516367 | 10551105 | 34739   | uncharacterized LOC101928100                                         |

|              |       |          |          |        |                                                           |
|--------------|-------|----------|----------|--------|-----------------------------------------------------------|
| AK096314     | chr12 | 10516367 | 10551105 | 34739  |                                                           |
| KLRK1        | chr12 | 10524951 | 10544490 | 19540  | killer cell lectin-like receptor subfamily K, member 1    |
| KLRC4-KLRK1  | chr12 | 10524951 | 10562745 | 37795  | KLRC4-KLRK1 readthrough                                   |
| KLRC4        | chr12 | 10559982 | 10562356 | 2375   | killer cell lectin-like receptor subfamily C, member 4    |
| KLRC3        | chr12 | 10564913 | 10588592 | 23680  | killer cell lectin-like receptor subfamily C, member 3    |
| KLRC2        | chr12 | 10579192 | 10588592 | 9401   | killer cell lectin-like receptor subfamily C, member 2    |
| KLRC1        | chr12 | 10594862 | 10607215 | 12354  | killer cell lectin-like receptor subfamily C, member 1    |
| KLRAF1       | chr12 | 10741076 | 10752434 | 11359  | killer cell lectin-like receptor subfamily A pseudogene 1 |
| MAGOHB       | chr12 | 10756363 | 10766208 | 9846   | mago-nashi homolog B (Drosophila)                         |
| STYK1        | chr12 | 10771537 | 10826891 | 55355  | serine/threonine/tyrosine kinase 1                        |
| YBX3         | chr12 | 10851675 | 10875953 | 24279  | Y box binding protein 3                                   |
| LOC101928162 | chr12 | 10902832 | 10930050 | 27219  | uncharacterized LOC101928162                              |
| TAS2R7       | chr12 | 10954130 | 10955226 | 1097   | taste receptor, type 2, member 7                          |
| TAS2R8       | chr12 | 10958649 | 10959579 | 931    | taste receptor, type 2, member 8                          |
| TAS2R9       | chr12 | 10961692 | 10962767 | 1076   | taste receptor, type 2, member 9                          |
| TAS2R10      | chr12 | 10977944 | 10978868 | 925    | taste receptor, type 2, member 10                         |
| PRR4         | chr12 | 10998447 | 11002075 | 3629   | proline rich 4 (lacrimal)                                 |
| TAS2R13      | chr12 | 11060524 | 11062161 | 1638   | taste receptor, type 2, member 13                         |
| PRH2         | chr12 | 11081833 | 11087444 | 5612   | proline-rich protein HaeIII subfamily 2                   |
| TAS2R14      | chr12 | 11090852 | 11091806 | 955    | taste receptor, type 2, member 14                         |
| TAS2R50      | chr12 | 11138511 | 11139511 | 1001   | taste receptor, type 2, member 50                         |
| TAS2R20      | chr12 | 11148560 | 11150474 | 1915   | taste receptor, type 2, member 20                         |
| PRH1-PRR4    | chr12 | 10998447 | 11324224 | 325778 | PRH1-PRR4 readthrough                                     |
| TAS2R19      | chr12 | 11174270 | 11175170 | 901    | taste receptor, type 2, member 19                         |
| PRH1         | chr12 | 11033559 | 11324222 | 290664 | proline-rich protein HaeIII subfamily 1                   |
| TAS2R31      | chr12 | 11182985 | 11184006 | 1022   | taste receptor, type 2, member 31                         |
| TAS2R46      | chr12 | 11213963 | 11214893 | 931    | taste receptor, type 2, member 46                         |
| TAS2R43      | chr12 | 11243885 | 11244912 | 1028   | taste receptor, type 2, member 43                         |
| PRB4         | chr12 | 11033559 | 11463369 | 429811 | proline-rich protein BstNI subfamily 4                    |
| TAS2R30      | chr12 | 11285883 | 11286843 | 961    | taste receptor, type 2, member 30                         |
| LOC100129361 | chr12 | 11323779 | 11328619 | 4841   | chromosome X open reading frame 69-like                   |
| TAS2R42      | chr12 | 11338598 | 11339543 | 946    | taste receptor, type 2, member 42                         |
| PRB3         | chr12 | 11418846 | 11422641 | 3796   | proline-rich protein BstNI subfamily 3                    |
| PRB1         | chr12 | 11504756 | 11508524 | 3769   | proline-rich protein BstNI subfamily 1                    |
| PRB2         | chr12 | 11544473 | 11548498 | 4026   | proline-rich protein BstNI subfamily 2                    |
| LINC01252    | chr12 | 11700963 | 11717335 | 16373  | long intergenic non-protein coding RNA 1252               |
| LOC338817    | chr12 | 11700963 | 11717335 | 16373  | long intergenic non-protein coding RNA 1252               |
| RNU6-19P     | chr12 | 11944823 | 12079107 | 134285 | RNA, U6 small nuclear 19, pseudogene                      |
| ETV6         | chr12 | 11802787 | 12268261 | 465475 | ets variant 6                                             |
| BC038742     | chr12 | 12202797 | 12208703 | 5907   |                                                           |
| MIR1244-1    | chr12 | 12264885 | 12264967 | 83     | microRNA 1244-1                                           |
| BCL2L14      | chr12 | 12223877 | 12363947 | 140071 | BCL2-like 14 (apoptosis facilitator)                      |
| LRP6         | chr12 | 12268960 | 12419811 | 150852 | low density lipoprotein receptor-related protein 6        |
| MANSC1       | chr12 | 12482217 | 12503169 | 20953  | MANSC domain containing 1                                 |
| LOH12CR1     | chr12 | 12510012 | 12619838 | 109827 | loss of heterozygosity, 12, chromosomal region 1          |
| DUSP16       | chr12 | 12626215 | 12715448 | 89234  | dual specificity phosphatase 16                           |
| CREBL2       | chr12 | 12764766 | 12798042 | 33277  | cAMP responsive element binding protein-like 2            |
| GPR19        | chr12 | 12813994 | 12849121 | 35128  | G protein-coupled receptor 19                             |
| GPRC5A       | chr12 | 13043955 | 13066600 | 22646  | G protein-coupled receptor, class C, group 5, member A    |
| MIR614       | chr12 | 13068762 | 13068852 | 91     | microRNA 614                                              |
| GPRC5D       | chr12 | 13093708 | 13103318 | 9611   | G protein-coupled receptor, class C, group 5, member D    |
| LOC100506314 | chr12 | 13132770 | 13137576 | 4807   | uncharacterized LOC100506314                              |
| HEBP1        | chr12 | 13127798 | 13153243 | 25446  | heme binding protein 1                                    |
| HTR7P1       | chr12 | 13153375 | 13157764 | 4390   | 5-hydroxytryptamine (serotonin) receptor 7 pseudogene 1   |
| AK125676     | chr12 | 13153380 | 13192604 | 39225  |                                                           |
| 5S_rRNA      | chr12 | 13199088 | 13199193 | 106    |                                                           |
| KIAA1467     | chr12 | 13197314 | 13236383 | 39070  | KIAA1467                                                  |
| GSG1         | chr12 | 13236470 | 13256630 | 20161  | germ cell associated 1                                    |
| EMP1         | chr12 | 13349601 | 13369708 | 20108  | epithelial membrane protein 1                             |
| C12orf36     | chr12 | 13523604 | 13529679 | 6076   | chromosome 12 open reading frame 36                       |
| 7SK          | chr12 | 13836475 | 13836820 | 346    | RNA, 7SK small nuclear                                    |
| GRIN2B       | chr12 | 13714409 | 14133022 | 418614 | glutamate receptor, ionotropic, N-methyl D-aspartate 2B   |
| BC067269     | chr12 | 14577938 | 14579759 | 1822   |                                                           |
| ATF7IP       | chr12 | 14518565 | 14655869 | 137305 | activating transcription factor 7 interacting protein     |
| PLBD1        | chr12 | 14656596 | 14720791 | 64196  | phospholipase B domain containing 1                       |
| PLBD1-AS1    | chr12 | 14720665 | 14772689 | 52025  | PLBD1 antisense RNA 1                                     |
| GUCY2C       | chr12 | 14765567 | 14849519 | 83953  | guanylate cyclase 2C (heat stable enterotoxin receptor)   |
| HIST4H4      | chr12 | 14920932 | 14924065 | 3134   | histone cluster 4, H4                                     |
| H2AFJ        | chr12 | 14927269 | 14930936 | 3668   | H2A histone family, member J                              |
| WBP11        | chr12 | 14939411 | 14956401 | 16991  | WW domain binding protein 11                              |
| SMCO3        | chr12 | 14957583 | 14967116 | 9534   | single-pass membrane protein with coiled-coil domains 3   |
| C12orf60     | chr12 | 14956505 | 14976791 | 20287  | chromosome 12 open reading frame 60                       |
| ART4         | chr12 | 14982244 | 14996413 | 14170  | ADP-ribosyltransferase 4 (Dombrock blood group)           |
| MGP          | chr12 | 15034114 | 15038853 | 4740   | matrix Gla protein                                        |
| ERP27        | chr12 | 15066960 | 15091483 | 24524  | endoplasmic reticulum protein 27                          |
| ARHGDI       | chr12 | 15094949 | 15114562 | 19614  | Rho GDP dissociation inhibitor (GDI) beta                 |
| PDE6H        | chr12 | 15125955 | 15134799 | 8845   | phosphodiesterase 6H, cGMP-specific, cone, gamma          |
| LINC01489    | chr12 | 15154766 | 15159617 | 4852   | long intergenic non-protein coding RNA 1489               |
| RERG-AS1     | chr12 | 15304856 | 15308215 | 3360   | RERG antisense RNA 1                                      |
| RERG         | chr12 | 15260715 | 15374411 | 113697 | RAS-like, estrogen-regulated, growth inhibitor            |

|              |       |          |          |         |                                                                              |
|--------------|-------|----------|----------|---------|------------------------------------------------------------------------------|
| PTPRO        | chr12 | 15475190 | 15751265 | 276076  | protein tyrosine phosphatase, receptor type, O                               |
| EPS8         | chr12 | 15773074 | 15942510 | 169437  | epidermal growth factor receptor pathway substrate 8                         |
| STRAP        | chr12 | 16035287 | 16056410 | 21124   | serine/threonine kinase receptor associated protein                          |
| DERA         | chr12 | 16064105 | 16190315 | 126211  | deoxyribose-phosphate aldolase (putative)                                    |
| SLC15A5      | chr12 | 16341418 | 16430619 | 89202   | solute carrier family 15, member 5                                           |
| MGST1        | chr12 | 16500075 | 16530123 | 30049   | microsomal glutathione S-transferase 1                                       |
| LMO3         | chr12 | 16701305 | 16762758 | 61454   | LIM domain only 3 (rhombotin-like 2)                                         |
| SKP1P2       | chr12 | 17141680 | 17143562 | 1883    | S-phase kinase-associated protein 1 pseudogene 2                             |
| U6           | chr12 | 17224331 | 17224439 | 109     | RNA, U6 small nuclear 50, pseudogene                                         |
| MIR3974      | chr12 | 17826232 | 17826328 | 97      | microRNA 3974                                                                |
| REGL         | chr12 | 18233802 | 18243127 | 9326    | RERG/RAS-like                                                                |
| PIK3C2G      | chr12 | 18414473 | 18801352 | 386880  | phosphatidylinositol-4-phosphate 3-kinase, catalytic subunit type 2 gamma    |
| PLCZ1        | chr12 | 18836109 | 18890993 | 54885   | phospholipase C, zeta 1                                                      |
| CAPZA3       | chr12 | 18891044 | 18892122 | 1079    | capping protein (actin filament) muscle Z-line, alpha 3                      |
| PLEKHA5      | chr12 | 19282625 | 19529333 | 246709  | pleckstrin homology domain containing, family A member 5                     |
| AEBP2        | chr12 | 19592607 | 19675173 | 82567   | AE binding protein 2                                                         |
| LOC100506393 | chr12 | 20167618 | 20251802 | 84185   | uncharacterized LOC100506393                                                 |
| PDE3A        | chr12 | 20522178 | 20837041 | 314864  | phosphodiesterase 3A, cGMP-inhibited                                         |
| SLCO1C1      | chr12 | 20848288 | 20906320 | 58033   | solute carrier organic anion transporter family, member 1C1                  |
| SLCO1B3      | chr12 | 20963637 | 21243040 | 279404  | solute carrier organic anion transporter family, member 1B3                  |
| SLCO1B7      | chr12 | 20968607 | 21243040 | 274434  | solute carrier organic anion transporter family, member 1B7 (non-functional) |
| SLCO1B1      | chr12 | 21284127 | 21392730 | 108604  | solute carrier organic anion transporter family, member 1B1                  |
| SLCO1A2      | chr12 | 21417533 | 21548371 | 130839  | solute carrier organic anion transporter family, member 1A2                  |
| IAPP         | chr12 | 21525801 | 21532914 | 7114    | islet amyloid polypeptide                                                    |
| PYROXD1      | chr12 | 21590537 | 21624182 | 33646   | pyridine nucleotide-disulphide oxidoreductase domain 1                       |
| RECQL        | chr12 | 21621843 | 21654603 | 32761   | RecQ helicase-like                                                           |
| GOLT1B       | chr12 | 21654698 | 21671337 | 16640   | golgi transport 1B                                                           |
| C12orf39     | chr12 | 21679255 | 21684210 | 4956    | spexin hormone                                                               |
| SPX          | chr12 | 21679255 | 21684210 | 4956    | spexin hormone                                                               |
| GYS2         | chr12 | 21689122 | 21757781 | 68660   | glycogen synthase 2 (liver)                                                  |
| LDHB         | chr12 | 21788274 | 21810789 | 22516   | lactate dehydrogenase B                                                      |
| KCNJ8        | chr12 | 21917888 | 21927755 | 9868    | potassium inwardly-rectifying channel, subfamily J, member 8                 |
| ABCC9        | chr12 | 21950323 | 22094336 | 144014  | ATP-binding cassette, sub-family C (CFTR/MRP), member 9                      |
| CMAS         | chr12 | 22199109 | 22218606 | 19498   | cytidine monophosphate N-acetylneuraminic acid synthetase                    |
| ST8SIA1      | chr12 | 22346324 | 22487648 | 141325  | ST8 alpha-N-acetyl-neuraminide alpha-2,8-sialyltransferase 1                 |
| C2CD5        | chr12 | 22601479 | 22697480 | 96002   | C2 calcium-dependent domain containing 5                                     |
| ETNK1        | chr12 | 22778075 | 22843608 | 65534   | ethanolamine kinase 1                                                        |
| Mir_720      | chr12 | 22853863 | 22853963 | 101     |                                                                              |
| AK094733     | chr12 | 23117505 | 23327057 | 209553  |                                                                              |
| LOC101928441 | chr12 | 23328569 | 23344521 | 15953   | uncharacterized LOC101928441                                                 |
| SOX5         | chr12 | 23685230 | 24715383 | 1030154 | SRY (sex determining region Y)-box 5                                         |
| MIR920       | chr12 | 24365354 | 24365429 | 76      | microRNA 920                                                                 |
| LOC101928471 | chr12 | 24376204 | 24390899 | 14696   | uncharacterized LOC101928471                                                 |
| LINC00477    | chr12 | 24719897 | 24737102 | 17206   | long intergenic non-protein coding RNA 477                                   |
| BCAT1        | chr12 | 24962957 | 25102393 | 139437  | branched chain amino-acid transaminase 1, cytosolic                          |
| C12orf77     | chr12 | 25146364 | 25150453 | 4090    | chromosome 12 open reading frame 77                                          |
| LRMP         | chr12 | 25205180 | 25261269 | 56090   | lymphoid-restricted membrane protein                                         |
| CASC1        | chr12 | 25261222 | 25348094 | 86873   | cancer susceptibility candidate 1                                            |
| LYRM5        | chr12 | 25348149 | 25357949 | 9801    | LYR motif containing 5                                                       |
| KRAS         | chr12 | 25357722 | 25403865 | 46144   | Kirsten rat sarcoma viral oncogene homolog                                   |
| DD157417     | chr12 | 25398274 | 25398297 | 24      |                                                                              |
| IFLTD1       | chr12 | 25629015 | 25801496 | 172482  | lamin tail domain containing 1                                               |
| LMNTD1       | chr12 | 25629015 | 25801496 | 172482  | lamin tail domain containing 1                                               |
| MIR4302      | chr12 | 26026952 | 26027012 | 61      | microRNA 4302                                                                |
| RASSF8-AS1   | chr12 | 26097789 | 26112375 | 14587   | RASSF8 antisense RNA 1                                                       |
| RASSF8       | chr12 | 26111963 | 26232825 | 120863  | Ras association (RalGDS/AF-6) domain family (N-terminal) member 8            |
| BHLHE41      | chr12 | 26272958 | 26278003 | 5046    | basic helix-loop-helix family, member e41                                    |
| BC041929     | chr12 | 26287896 | 26334217 | 46322   |                                                                              |
| SSPN         | chr12 | 26348268 | 26405853 | 57586   | sarcospan                                                                    |
| ITPR2        | chr12 | 26488284 | 26986131 | 497848  | inositol 1,4,5-trisphosphate receptor, type 2                                |
| ASUN         | chr12 | 27058111 | 27091254 | 33144   | asunder spermatogenesis regulator                                            |
| FGFR1OP2     | chr12 | 27091304 | 27119581 | 28278   | FGFR1 oncogene partner 2                                                     |
| TM7SF3       | chr12 | 27124505 | 27167339 | 42835   | transmembrane 7 superfamily member 3                                         |
| MED21        | chr12 | 27175454 | 27183606 | 8153    | mediator complex subunit 21                                                  |
| C12orf71     | chr12 | 27233989 | 27235455 | 1467    | chromosome 12 open reading frame 71                                          |
| STK38L       | chr12 | 27397077 | 27478890 | 81814   | serine/threonine kinase 38 like                                              |
| ARNTL2       | chr12 | 27485786 | 27578746 | 92961   | aryl hydrocarbon receptor nuclear translocator-like 2                        |
| BC043511     | chr12 | 27542721 | 27599558 | 56838   |                                                                              |
| ARNTL2-AS1   | chr12 | 27542721 | 27599567 | 56847   | ARNTL2 antisense RNA 1                                                       |
| SMCO2        | chr12 | 27619742 | 27655118 | 35377   | single-pass membrane protein with coiled-coil domains 2                      |
| PPFIBP1      | chr12 | 27677044 | 27848497 | 171454  | PTPRF interacting protein, binding protein 1 (liprin beta 1)                 |
| AK000807     | chr12 | 27809602 | 27810048 | 447     |                                                                              |
| TRNA_Lys     | chr12 | 27843305 | 27843378 | 74      |                                                                              |
| REP15        | chr12 | 27849427 | 27850566 | 1140    | RAB15 effector protein                                                       |
| MRPS35       | chr12 | 27863705 | 27909237 | 45533   | mitochondrial ribosomal protein S35                                          |
| MANSC4       | chr12 | 27915598 | 27924209 | 8612    | MANSC domain containing 4                                                    |
| KLHL42       | chr12 | 27933186 | 27955973 | 22788   | kelch-like family member 42                                                  |
| PTH LH       | chr12 | 28111016 | 28124916 | 13901   | parathyroid hormone-like hormone                                             |
| CCDC91       | chr12 | 28332209 | 28703099 | 370891  | coiled-coil domain containing 91                                             |
| FAR2         | chr12 | 29301935 | 29488549 | 186615  | fatty acyl CoA reductase 2                                                   |

|                 |       |          |          |        |                                                                      |
|-----------------|-------|----------|----------|--------|----------------------------------------------------------------------|
| LOC100506606    | chr12 | 29433348 | 29470781 | 37434  | uncharacterized LOC100506606                                         |
| AX746523        | chr12 | 29433350 | 29470781 | 37432  |                                                                      |
| ERGIC2          | chr12 | 29493578 | 29534143 | 40566  | ERGIC and golgi 2                                                    |
| OVCH1-AS1       | chr12 | 29542226 | 29640257 | 98032  | OVCH1 antisense RNA 1                                                |
| OVCH1           | chr12 | 29580488 | 29650619 | 70132  | ovochoyase 1                                                         |
| TMTC1           | chr12 | 29653745 | 29937692 | 283948 | transmembrane and tetratricopeptide repeat containing 1              |
| IPO8            | chr12 | 30781914 | 30848929 | 67016  | importin 8                                                           |
| CAPRIN2         | chr12 | 30862485 | 30907448 | 44964  | caprin family member 2                                               |
| LINC00941       | chr12 | 30948614 | 30955645 | 7032   | long intergenic non-protein coding RNA 941                           |
| TSPAN11         | chr12 | 31079361 | 31149537 | 70177  | tetraspanin 11                                                       |
| DDX11-AS1       | chr12 | 31173696 | 31226781 | 53086  | DDX11 antisense RNA 1                                                |
| DDX11           | chr12 | 31226778 | 31257725 | 30948  | DEAD/H (Asp-Glu-Ala-Asp/His) box helicase 11                         |
| DKFZp434C06     | chr12 | 31264585 | 31274400 | 9816   |                                                                      |
| OVOS2           | chr12 | 31267684 | 31359088 | 91405  | ovostatin 2                                                          |
| hsa-miR-3194    | chr12 | 31379257 | 31379277 | 21     |                                                                      |
| FAM60A          | chr12 | 31433519 | 31479159 | 45641  | family with sequence similarity 60, member A                         |
| FLJ13224        | chr12 | 31477249 | 31478879 | 1631   | uncharacterized LOC79857                                             |
| BC039477        | chr12 | 31516414 | 31522235 | 5822   |                                                                      |
| DENND5B         | chr12 | 31535156 | 31743952 | 208797 | DENND/MADD domain containing 5B                                      |
| U5              | chr12 | 31747026 | 31747140 | 115    |                                                                      |
| DENND5B-AS1     | chr12 | 31742856 | 31768285 | 25430  | DENND5B antisense RNA 1                                              |
| METTL20         | chr12 | 31800093 | 31822016 | 21924  | methyltransferase like 20                                            |
| AMN1            | chr12 | 31824070 | 31882108 | 58039  | antagonist of mitotic exit network 1 homolog (S. cerevisiae)         |
| H3F3C           | chr12 | 31944118 | 31945175 | 1058   | H3 histone, family 3C                                                |
| KIAA1551        | chr12 | 32112352 | 32146043 | 33692  | KIAA1551                                                             |
| RNU6-78P        | chr12 | 32146772 | 32146802 | 31     | RNA, U6 small nuclear 78, pseudogene                                 |
| BICD1           | chr12 | 32260184 | 32531141 | 270958 | bicaudal D homolog 1 (Drosophila)                                    |
| TCRA            | chr14 | 22314718 | 22534581 | 219864 | T cell receptor alpha constant                                       |
| TRA@            | chr14 | 22362569 | 22534581 | 172013 |                                                                      |
| TRAV20          | chr14 | 22508842 | 22509396 | 555    | T cell receptor alpha variable 20                                    |
| AV30S1          | chr14 | 22509128 | 22509405 | 278    |                                                                      |
| TCRA            | chr14 | 22538905 | 22539467 | 563    | T cell receptor alpha constant                                       |
| TCRVA13         | chr14 | 22539214 | 22539470 | 257    |                                                                      |
| AV2S1A1         | chr14 | 22356036 | 22745911 | 389876 |                                                                      |
| TCRA            | chr14 | 22554668 | 22555238 | 571    | T cell receptor alpha constant                                       |
| TCRAVN1         | chr14 | 22580299 | 22580985 | 687    |                                                                      |
| TRA@            | chr14 | 22591337 | 22592252 | 916    |                                                                      |
| TCRA            | chr14 | 22600965 | 22600989 | 25     | T cell receptor alpha constant                                       |
| TCRA            | chr14 | 22636292 | 22636879 | 588    | T cell receptor alpha constant                                       |
| U39094          | chr14 | 22636757 | 22636881 | 125    |                                                                      |
| TCRA            | chr14 | 22293655 | 23021097 | 727443 | T cell receptor alpha constant                                       |
| TCR-alpha       | chr14 | 22336979 | 23000088 | 663110 |                                                                      |
| V alpha immun   | chr14 | 22675417 | 22676029 | 613    |                                                                      |
| AV2S1           | chr14 | 22689762 | 22690367 | 606    |                                                                      |
| TRA             | chr14 | 22458652 | 23016719 | 558068 | T cell receptor alpha locus                                          |
| TCR             | chr14 | 22739820 | 22740442 | 623    |                                                                      |
| T-cell receptor | chr14 | 22740275 | 22740445 | 171    |                                                                      |
| TRD             | chr14 | 22465824 | 23016719 | 550896 | T cell receptor delta locus                                          |
| TRAC            | chr14 | 22466122 | 23021097 | 554976 | T cell receptor alpha constant                                       |
| av27s1          | chr14 | 22771875 | 22772438 | 564    |                                                                      |
| TCR- alpha V 3  | chr14 | 22782884 | 22783343 | 460    |                                                                      |
| TCR-alpha       | chr14 | 22788567 | 22789122 | 556    |                                                                      |
| hADV29S1        | chr14 | 22631190 | 23000088 | 368899 | T cell receptor alpha variable 29/delta variable 5 (gene/pseudogene) |
| TRA@            | chr14 | 22615959 | 23021097 | 405139 |                                                                      |
| AV4S1           | chr14 | 22670486 | 22981890 | 311405 |                                                                      |
| hADV36S1        | chr14 | 22694611 | 23016719 | 322109 | T cell receptor alpha variable 36/delta variable 7                   |
| hADV38S2        | chr14 | 22748987 | 22962976 | 213990 | T cell receptor alpha variable 38-2/delta variable 8                 |
| hDV102S1        | chr14 | 22891471 | 22892033 | 563    | T cell receptor delta variable 2                                     |
| AK125397        | chr14 | 22886527 | 22901726 | 15200  |                                                                      |
| AK093552        | chr14 | 22849082 | 22951948 | 102867 |                                                                      |
| TCRDV2J2        | chr14 | 22918106 | 22925700 | 7595   |                                                                      |
| TRDC            | chr14 | 22919080 | 22934912 | 15833  | T cell receptor delta constant                                       |
| TCRDV2          | chr14 | 22928088 | 22934912 | 6825   |                                                                      |
| hDV103S1        | chr14 | 22938034 | 22938658 | 625    | T cell receptor delta variable 3                                     |
| X61074          | chr14 | 22946618 | 22948187 | 1570   |                                                                      |
| ATP9B           | chr18 | 76829396 | 77138282 | 308887 | ATPase, class II, type 9B                                            |
| RBFAFN          | chr18 | 77806899 | 77839206 | 32308  | RBFA downstream neighbor (non-protein coding)                        |
| RBFA            | chr18 | 77794345 | 77853788 | 59444  | ribosome binding factor A (putative)                                 |
| ADNP2           | chr18 | 77866914 | 77898228 | 31315  | ADNP homeobox 2                                                      |
| PARD6G-AS1      | chr18 | 77905806 | 77936315 | 30510  | PARD6G antisense RNA 1                                               |
| PARD6G          | chr18 | 77915116 | 78005397 | 90282  | par-6 family cell polarity regulator gamma                           |
| IGLL1           | chr22 | 23915312 | 23922495 | 7184   | immunoglobulin lambda-like polypeptide 1                             |
| DQ586720        | chr22 | 23952777 | 23952803 | 27     |                                                                      |
| C22orf43        | chr22 | 23950638 | 23974508 | 23871  | aspartate-rich 1                                                     |
| DRICH1          | chr22 | 23950638 | 23974508 | 23871  | aspartate-rich 1                                                     |
| GUSBP11         | chr22 | 23980674 | 24059610 | 78937  | glucuronidase, beta pseudogene 11                                    |
| RGL4            | chr22 | 24032960 | 24041363 | 8404   | ral guanine nucleotide dissociation stimulator-like 4                |
| ZNF70           | chr22 | 24083771 | 24093279 | 9509   | zinc finger protein 70                                               |
| VPREB3          | chr22 | 24094929 | 24096630 | 1702   | pre-B lymphocyte 3                                                   |
| C22orf15        | chr22 | 24105207 | 24108050 | 2844   | chromosome 22 open reading frame 15                                  |

|             |       |          |          |        |                                                                     |
|-------------|-------|----------|----------|--------|---------------------------------------------------------------------|
| CHCHD10     | chr22 | 24108020 | 24110159 | 2140   | coiled-coil-helix-coiled-coil-helix domain containing 10            |
| MMP11       | chr22 | 24115035 | 24126503 | 11469  | matrix metalloproteinase 11 (stromelysin 3)                         |
| CABIN1      | chr22 | 24407764 | 24574596 | 166833 | calcineurin binding protein 1                                       |
| SUSD2       | chr22 | 24577443 | 24585074 | 7632   | sushi domain containing 2                                           |
| GGT5        | chr22 | 24615621 | 24641110 | 25490  | gamma-glutamyltransferase 5                                         |
| UNQ2565     | chr22 | 24647952 | 24649256 | 1305   | POM121-like                                                         |
| POM121L9P   | chr22 | 24647588 | 24661492 | 13905  | POM121 transmembrane nucleoporin-like 9, pseudogene                 |
| DQ576853    | chr22 | 24658457 | 24658483 | 27     |                                                                     |
| SPECC1L     | chr22 | 24666784 | 24838325 | 171542 | sperm antigen with calponin homology and coiled-coil domains 1-like |
| SPECC1L-ADC | chr22 | 24666784 | 24838328 | 171545 | SPECC1L-ADORA2A readthrough (NMD candidate)                         |
| ADORA2A     | chr22 | 24813708 | 24838328 | 24621  | adenosine A2a receptor                                              |
| EU036692    | chr22 | 24827818 | 24828694 | 877    |                                                                     |
| ADORA2A-AS1 | chr22 | 24825177 | 24890783 | 65607  | ADORA2A antisense RNA 1                                             |
| UPB1        | chr22 | 24863205 | 24922553 | 59349  | ureidopropionase, beta                                              |
| PIWIL3      | chr22 | 25115000 | 25170687 | 55688  | piwi-like RNA-mediated gene silencing 3                             |
| TOP1P2      | chr22 | 25160467 | 25161986 | 1520   | topoisomerase (DNA) I pseudogene 2                                  |
| CRYBB2      | chr22 | 25615611 | 25627836 | 12226  | crystallin, beta B2                                                 |
| BC040576    | chr22 | 25677208 | 25679061 | 1854   |                                                                     |
| IGLL3P      | chr22 | 25714223 | 25716193 | 1971   | immunoglobulin lambda-like polypeptide 3, pseudogene                |
| LRP5L       | chr22 | 25747384 | 25777544 | 30161  | low density lipoprotein receptor-related protein 5-like             |
| MIR6817     | chr22 | 25851612 | 25851678 | 67     | microRNA 6817                                                       |
| CRYBB2P1    | chr22 | 25844053 | 25907585 | 63533  | crystallin, beta B2 pseudogene 1                                    |
| ADRBK2      | chr22 | 25960860 | 26125258 | 164399 | adrenergic, beta, receptor kinase 2                                 |
| MYO18B      | chr22 | 26138119 | 26427007 | 288889 | myosin XVIIIB                                                       |
| SEZ6L       | chr22 | 26565439 | 26779563 | 214125 | seizure related 6 homolog (mouse)-like                              |
| ASPHD2      | chr22 | 26825279 | 26840978 | 15700  | aspartate beta-hydroxylase domain containing 2                      |
| HPS4        | chr22 | 26846848 | 26879829 | 32982  | Hermansky-Pudlak syndrome 4                                         |
| SRRD        | chr22 | 26879845 | 26887904 | 8060   | SRR1 domain containing                                              |
| TFIP11      | chr22 | 26887893 | 26908437 | 20545  | tufelin interacting protein 11                                      |
| MIR548J     | chr22 | 26951177 | 26951289 | 113    | microRNA 548j                                                       |
| TPST2       | chr22 | 26921713 | 26986089 | 64377  | tyrosylprotein sulfotransferase 2                                   |
| CRYBB1      | chr22 | 26995361 | 27013991 | 18631  | crystallin, beta B1                                                 |
| CRYBA4      | chr22 | 27017927 | 27026636 | 8710   | crystallin, beta A4                                                 |
| MIAT        | chr22 | 27053445 | 27072440 | 18996  | myocardial infarction associated transcript (non-protein coding)    |
| AK124820    | chr22 | 27063655 | 27068617 | 4963   |                                                                     |
| AK026502    | chr22 | 27068848 | 27114949 | 46102  |                                                                     |
| MIATNB      | chr22 | 27068805 | 27176856 | 108052 | MIAT neighbor (non-protein coding)                                  |
| LINC01422   | chr22 | 27299254 | 27316573 | 17320  | long intergenic non-protein coding RNA 1422                         |
| AK055980    | chr22 | 27444105 | 27456467 | 12363  |                                                                     |
| BC015159    | chr22 | 27619257 | 27622760 | 3504   |                                                                     |
| AX748308    | chr22 | 28276021 | 28277106 | 1086   |                                                                     |
| PITPNB      | chr22 | 28247656 | 28315294 | 67639  | phosphatidylinositol transfer protein, beta                         |
| MIR3199-1   | chr22 | 28316512 | 28316600 | 89     | microRNA 3199-1                                                     |
| MIR3199-2   | chr22 | 28316513 | 28316599 | 87     | microRNA 3199-2                                                     |
| TTC28-AS1   | chr22 | 28315363 | 28404267 | 88905  | TTC28 antisense RNA 1                                               |
| TTC28       | chr22 | 28374001 | 29075853 | 701853 | tetratricopeptide repeat domain 28                                  |
| MIR5739     | chr22 | 28855856 | 28855936 | 81     | microRNA 5739                                                       |
| CHEK2       | chr22 | 29083730 | 29137822 | 54093  | checkpoint kinase 2                                                 |
| ZNRF3       | chr22 | 29279754 | 29453476 | 173723 | zinc and ring finger 3                                              |
| ZNRF3-AS1   | chr22 | 29420986 | 29427464 | 6479   | ZNRF3 antisense RNA 1                                               |
| C22orf31    | chr22 | 29454659 | 29457907 | 3249   | chromosome 22 open reading frame 31                                 |
| KREMEN1     | chr22 | 29469065 | 29564321 | 95257  | kringle containing transmembrane protein 1                          |
| EMID1       | chr22 | 29601900 | 29655586 | 53687  | EMI domain containing 1                                             |
| RHBDD3      | chr22 | 29655843 | 29663914 | 8072   | rhomboid domain containing 3                                        |
| EWSR1       | chr22 | 29663997 | 29696515 | 32519  | EWS RNA-binding protein 1                                           |
| RFPL1S      | chr22 | 29833003 | 29838118 | 5116   | RFPL1 antisense RNA 1                                               |
| RFPL1       | chr22 | 29834571 | 29838444 | 3874   | ret finger protein-like 1                                           |
| NEFH        | chr22 | 29876180 | 29887277 | 11098  | neurofilament, heavy polypeptide                                    |
| KIAA0845    | chr22 | 29885264 | 29887277 | 2014   |                                                                     |
| THOC5       | chr22 | 29904155 | 29949736 | 45582  | THO complex 5                                                       |
| NIPSNAP1    | chr22 | 29950797 | 29977326 | 26530  | nipsnap homolog 1 (C. elegans)                                      |
| NF2         | chr22 | 29999544 | 30094589 | 95046  | neurofibromin 2 (merlin)                                            |
| CABP7       | chr22 | 30116343 | 30127820 | 11478  | calcium binding protein 7                                           |
| ZMAT5       | chr22 | 30126944 | 30163000 | 36057  | zinc finger, matrin-type 5                                          |
| MTMR3       | chr22 | 30279157 | 30426857 | 147701 | myotubularin related protein 3                                      |
| MIR6818     | chr22 | 30403037 | 30403102 | 66     | microRNA 6818                                                       |
| HORMAD2-AS  | chr22 | 30404730 | 30476469 | 71740  | HORMAD2 antisense RNA 1                                             |
| HORMAD2     | chr22 | 30476452 | 30573062 | 96611  | HORMA domain containing 2                                           |
| PES1        | chr22 | 30972611 | 31003000 | 30390  | pescadillo ribosomal biogenesis factor 1                            |
| TCN2        | chr22 | 31003069 | 31023047 | 19979  | transcobalamin II                                                   |
| SLC35E4     | chr22 | 31031792 | 31065003 | 33212  | solute carrier family 35, member E4                                 |
| DUSP18      | chr22 | 31048037 | 31063872 | 15836  | dual specificity phosphatase 18                                     |
| MIR3200     | chr22 | 31127543 | 31127628 | 86     | microRNA 3200                                                       |
| OSBP2       | chr22 | 31089768 | 31303811 | 214044 | oxysterol binding protein 2                                         |
| MORC2-AS1   | chr22 | 31318294 | 31322640 | 4347   | MORC2 antisense RNA 1                                               |
| MORC2       | chr22 | 31322599 | 31364187 | 41589  | MORC family CW-type zinc finger 2                                   |
| TUG1        | chr22 | 31365196 | 31375380 | 10185  | taurine up-regulated 1 (non-protein coding)                         |
| SMTN        | chr22 | 31477281 | 31500610 | 23330  | smoothelin                                                          |
| AX747817    | chr22 | 31497861 | 31500743 | 2883   |                                                                     |
| SELM        | chr22 | 31500762 | 31503551 | 2790   | selenoprotein M                                                     |

|              |       |          |          |        |                                                                   |
|--------------|-------|----------|----------|--------|-------------------------------------------------------------------|
| INPP5J       | chr22 | 31503960 | 31530683 | 26724  | inositol polyphosphate-5-phosphatase J                            |
| PLA2G3       | chr22 | 31530792 | 31536593 | 5802   | phospholipase A2, group III                                       |
| MIR3928      | chr22 | 31556047 | 31556105 | 59     | microRNA 3928                                                     |
| RNF185       | chr22 | 31556137 | 31603005 | 46869  | ring finger protein 185                                           |
| BC069815     | chr22 | 31601248 | 31601602 | 355    |                                                                   |
| Y_RNA        | chr22 | 31626056 | 31626158 | 103    |                                                                   |
| LIMK2        | chr22 | 31608249 | 31676066 | 67818  | LIM domain kinase 2                                               |
| Mir_1302     | chr22 | 32452438 | 32452490 | 53     |                                                                   |
| SLC5A1       | chr22 | 32439018 | 32509011 | 69994  | solute carrier family 5 (sodium/glucose cotransporter), member 1  |
| AP1B1P1      | chr22 | 32517963 | 32529456 | 11494  | adaptor-related protein complex 1, beta 1 subunit pseudogene 1    |
| JB175027     | chr22 | 32524336 | 32524357 | 22     |                                                                   |
| C22orf42     | chr22 | 32545518 | 32555243 | 9726   | chromosome 22 open reading frame 42                               |
| RFPL2        | chr22 | 32586421 | 32600718 | 14298  | ret finger protein-like 2                                         |
| SLC5A4       | chr22 | 32614462 | 32651318 | 36857  | solute carrier family 5 (glucose activated ion channel), member 4 |
| JB153905     | chr22 | 32744122 | 32744144 | 23     |                                                                   |
| RFPL3        | chr22 | 32750871 | 32757148 | 6278   | ret finger protein-like 3                                         |
| RFPL3S       | chr22 | 32755892 | 32767251 | 11360  | RFPL3 antisense                                                   |
| LOC339666    | chr22 | 32772650 | 32780329 | 7680   | uncharacterized LOC339666                                         |
| RTCB         | chr22 | 32783561 | 32808274 | 24714  | RNA 2',3'-cyclic phosphate and 5'-OH ligase                       |
| BPIFC        | chr22 | 32809833 | 32860433 | 50601  | BPI fold containing family C                                      |
| FBXO7        | chr22 | 32870706 | 32894818 | 24113  | F-box protein 7                                                   |
| AK123891     | chr22 | 32896531 | 32898414 | 1884   |                                                                   |
| 5S_rRNA      | chr22 | 33031087 | 33031184 | 98     |                                                                   |
| SYN3         | chr22 | 32908539 | 33454377 | 545839 | synapsin III                                                      |
| TIMP3        | chr22 | 33196801 | 33259028 | 62228  | TIMP metalloproteinase inhibitor 3                                |
| MIR4764      | chr22 | 33832567 | 33832655 | 89     | microRNA 4764                                                     |
| LARGE        | chr22 | 33669061 | 34318584 | 649524 | like-glycosyltransferase                                          |
| SNORA50      | chr22 | 34100771 | 34100908 | 138    | small nucleolar RNA, H/ACA box 76A                                |
| LARGE-AS1    | chr22 | 34120971 | 34146803 | 25833  | LARGE antisense RNA 1                                             |
| ISX          | chr22 | 35462129 | 35483380 | 21252  | intestine-specific homeobox                                       |
| HMGXB4       | chr22 | 35653444 | 35691800 | 38357  | HMG box domain containing 4                                       |
| TOM1         | chr22 | 35695267 | 35743987 | 48721  | target of myb1 (chicken)                                          |
| MIR3909      | chr22 | 35731632 | 35731751 | 120    | microRNA 3909                                                     |
| MIR6069      | chr22 | 35732713 | 35732792 | 80     | microRNA 6069                                                     |
| RASD2        | chr22 | 35937351 | 35950045 | 12695  | RASD family, member 2                                             |
| MB           | chr22 | 36002810 | 36019401 | 16592  | myoglobin                                                         |
| LOC284912    | chr22 | 36023037 | 36031181 | 8145   | uncharacterized LOC284912                                         |
| APOL6        | chr22 | 36044423 | 36064456 | 20034  | apolipoprotein L, 6                                               |
| APOL5        | chr22 | 36113918 | 36125529 | 11612  | apolipoprotein L, 5                                               |
| RBFOX2       | chr22 | 36134782 | 36424585 | 289804 | RNA binding protein, fox-1 homolog (C. elegans) 2                 |
| APOL3        | chr22 | 36536370 | 36562225 | 25856  | apolipoprotein L, 3                                               |
| APOL4        | chr22 | 36585175 | 36600879 | 15705  | apolipoprotein L, 4                                               |
| APOL2        | chr22 | 36622254 | 36636000 | 13747  | apolipoprotein L, 2                                               |
| MFNG         | chr22 | 37865100 | 37882478 | 17379  | MFNG O-fucosylpeptide 3-beta-N-acetylglucosaminyltransferase      |
| CARD10       | chr22 | 37875382 | 37915378 | 39997  | caspase recruitment domain family, member 10                      |
| GTPBP1       | chr22 | 39101806 | 39129592 | 27787  | GTP binding protein 1                                             |
| SUN2         | chr22 | 39130718 | 39190161 | 59444  | Sad1 and UNC84 domain containing 2                                |
| DNAL4        | chr22 | 39174512 | 39190161 | 15650  | dynein, axonemal, light chain 4                                   |
| NPTXR        | chr22 | 39214455 | 39240017 | 25563  | neuronal pentraxin receptor                                       |
| CBX6         | chr22 | 39260247 | 39268258 | 8012   | chromobox homolog 6                                               |
| CACNA11      | chr22 | 39966757 | 40085740 | 118984 | calcium channel, voltage-dependent, T type, alpha 11 subunit      |
| ENTHD1       | chr22 | 40139048 | 40289794 | 150747 | ENTH domain containing 1                                          |
| GRAP2        | chr22 | 40297085 | 40369346 | 72262  | GRB2-related adaptor protein 2                                    |
| FAM83F       | chr22 | 40390952 | 40426043 | 35092  | family with sequence similarity 83, member F                      |
| LOC100130899 | chr22 | 40428335 | 40432581 | 4247   | uncharacterized LOC100130899                                      |
| TNRC6B       | chr22 | 40440820 | 40731812 | 290993 | trinucleotide repeat containing 6B                                |
| ADSL         | chr22 | 40742503 | 40762575 | 20073  | adenylosuccinate lyase                                            |
| SGSM3        | chr22 | 40766594 | 40806293 | 39700  | small G protein signaling modulator 3                             |
| MKL1         | chr22 | 40806284 | 41032723 | 226440 | Megakaryoblastic leukemia 1                                       |
| LOC101927257 | chr22 | 40917803 | 40922711 | 4909   | uncharacterized LOC101927257                                      |
| LINC01315    | chr22 | 42760405 | 42765214 | 4810   | long intergenic non-protein coding RNA 1315                       |
| BC038245     | chr22 | 42760534 | 42765180 | 4647   |                                                                   |
| NFAM1        | chr22 | 42776413 | 42828401 | 51989  | NFAT activating protein with ITAM motif 1                         |
| SERHL        | chr22 | 42896584 | 42908566 | 11983  | serine hydrolase-like                                             |
| RRP7A        | chr22 | 42904340 | 42915829 | 11490  | ribosomal RNA processing 7 homolog A (S. cerevisiae)              |
| SERHL2       | chr22 | 42949867 | 42970388 | 20522  | serine hydrolase-like 2                                           |
| RRP7B        | chr22 | 42951228 | 42978017 | 26790  | ribosomal RNA processing 7 homolog B (S. cerevisiae)              |
| POLDIP3      | chr22 | 42979726 | 43010968 | 31243  | polymerase (DNA-directed), delta interacting protein 3            |
| CS330190     | chr22 | 43172869 | 43172890 | 22     |                                                                   |
| DQ595055     | chr22 | 43182195 | 43182228 | 34     |                                                                   |
| ARFGAP3      | chr22 | 43192531 | 43253408 | 60878  | ADP-ribosylation factor GTPase activating protein 3               |
| PACSN2       | chr22 | 43265771 | 43411184 | 145414 | protein kinase C and casein kinase substrate in neurons 2         |
| EFCAB6       | chr22 | 43924623 | 44208217 | 283595 | EF-hand calcium binding domain 6                                  |
| AX747137     | chr22 | 44220386 | 44222913 | 2528   |                                                                   |
| SULT4A1      | chr22 | 44220386 | 44258378 | 37993  | sulfotransferase family 4A, member 1                              |
| PNPLA5       | chr22 | 44275557 | 44287893 | 12337  | patatin-like phospholipase domain containing 5                    |
| PNPLA3       | chr22 | 44319618 | 44360433 | 40816  | patatin-like phospholipase domain containing 3                    |
| LOC101927526 | chr22 | 44839206 | 44840668 | 1463   | uncharacterized LOC101927526                                      |
| LDOC1L       | chr22 | 44888449 | 44894005 | 5557   | leucine zipper, down-regulated in cancer 1-like                   |
| LINC00207    | chr22 | 44965219 | 44968329 | 3111   | long intergenic non-protein coding RNA 207                        |



|              |       |          |          |         |                                                                            |
|--------------|-------|----------|----------|---------|----------------------------------------------------------------------------|
| LINC00229    | chr22 | 45002207 | 45021299 | 19093   | long intergenic non-protein coding RNA 229                                 |
| PRR5         | chr22 | 45064426 | 45133561 | 69136   | proline rich 5 (renal)                                                     |
| PRR5-ARHGAF  | chr22 | 45098077 | 45258664 | 160588  | PRR5-ARHGAP8 readthrough                                                   |
| ARHGAP8      | chr22 | 45148437 | 45258664 | 110228  | Rho GTPase activating protein 8                                            |
| PHF21B       | chr22 | 45277042 | 45405809 | 128768  | PHD finger protein 21B                                                     |
| NUP50-AS1    | chr22 | 45529638 | 45559662 | 30025   | NUP50 antisense RNA 1 (head to head)                                       |
| LOC100506714 | chr22 | 45529638 | 45559662 | 30025   | NUP50 antisense RNA 1 (head to head)                                       |
| NUP50        | chr22 | 45559725 | 45583890 | 24166   | nucleoporin 50kDa                                                          |
| ATXN10       | chr22 | 46067677 | 46241187 | 173511  | ataxin 10                                                                  |
| MIR4762      | chr22 | 46156403 | 46156478 | 76      | microRNA 4762                                                              |
| MIRLET7BHG   | chr22 | 46449725 | 46509808 | 60084   | MIRLET7B host gene (non-protein coding)                                    |
| MIRLET7B     | chr22 | 46509565 | 46509648 | 84      | microRNA let-7b                                                            |
| PPARA        | chr22 | 46546498 | 46639653 | 93156   | peroxisome proliferator-activated receptor alpha                           |
| LOC101927722 | chr22 | 47857047 | 47882860 | 25814   | uncharacterized LOC101927722                                               |
| BC037972     | chr22 | 47857047 | 47882860 | 25814   |                                                                            |
| LINC00898    | chr22 | 48016791 | 48027318 | 10528   | long intergenic non-protein coding RNA 898                                 |
| BC039485     | chr22 | 48027451 | 48038545 | 11095   |                                                                            |
| LOC284930    | chr22 | 48027422 | 48251349 | 223928  | uncharacterized LOC284930                                                  |
| AK093107     | chr22 | 48027451 | 48251349 | 223899  |                                                                            |
| MIR3201      | chr22 | 48670175 | 48670227 | 53      | microRNA 3201                                                              |
| LOC284933    | chr22 | 48934711 | 48943199 | 8489    | uncharacterized LOC284933                                                  |
| FAM19A5      | chr22 | 48885271 | 49147747 | 262477  | family with sequence similarity 19 (chemokine (C-C motif)-like), member A5 |
| MIR4535      | chr22 | 49176106 | 49176165 | 60      | microRNA 4535                                                              |
| LINC01310    | chr22 | 49262581 | 49294198 | 31618   | long intergenic non-protein coding RNA 1310                                |
| LOC100128946 | chr22 | 49262581 | 49294198 | 31618   | long intergenic non-protein coding RNA 1310                                |
| C22orf34     | chr22 | 49808173 | 50051190 | 243018  | chromosome 22 open reading frame 34                                        |
| BC033837     | chr22 | 49808173 | 50051190 | 243018  |                                                                            |
| DMD          | chrX  | 31137344 | 33357726 | 2220383 | dystrophin                                                                 |
| JA783513     | chrX  | 32827657 | 32827688 | 32      |                                                                            |
| JA783507     | chrX  | 32834568 | 32834591 | 24      |                                                                            |
| JA202257     | chrX  | 32834661 | 32834692 | 32      |                                                                            |
| JA783500     | chrX  | 32862888 | 32862913 | 26      |                                                                            |
| JA783498     | chrX  | 32862937 | 32862967 | 31      |                                                                            |
| JA783489     | chrX  | 32867872 | 32867918 | 47      |                                                                            |
| JA783482     | chrX  | 33038257 | 33038311 | 55      |                                                                            |
