# Supplementary material for: First insight into the somatic mutation burden of neurofibromatosis type 2-associated grade I and grade II meningiomas: a case report comprehensive genomic study of two cranial meningiomas with vastly different clinical presentation
Source: PubMed Central journal article supplement (PMC5307647; doi:10.1186/s12885-017-3127-6), 2017-02-13
Supplement: 12885_2017_3127_MOESM4_ESM.pdf [file 12885_2017_3127_MOESM4_ESM.pdf]

**Additional File 4. Cancer genes affected by losses or gains in the grade II meningioma.**

| Gene Symbol | Name                                                               | Chromosome | Chr Band       | Start     | End       | Length | Cancer Somatic Mut | Cancer Germline Mut | Tumour Types (Somatic Mutations)                                                                       |
|-------------|--------------------------------------------------------------------|------------|----------------|-----------|-----------|--------|--------------------|---------------------|--------------------------------------------------------------------------------------------------------|
| PRDM16      | PR domain containing 16                                            | chr1       | 1p36.23-p33    | 2985741   | 3355185   | 369445 | yes                |                     | MDS, AML                                                                                               |
| CAMTA1      | calmodulin binding transcription activator 1                       | chr1       | 1p36.31-p36.23 | 6845383   | 7829766   | 984384 | yes                |                     | epithelioid haemangioendotheloma                                                                       |
| PAX7        | paired box gene 7                                                  | chr1       | 1p36.2-p36.12  | 18957499  | 19075360  | 117862 | yes                |                     | alveolar rhabdomyosarcoma                                                                              |
| LCK         | lymphocyte-specific protein tyrosine kinase                        | chr1       | 1p35-p34.3     | 32716839  | 32751768  | 34930  | yes                |                     | T-ALL                                                                                                  |
| SFPQ        | splicing factor proline/glutamine rich(polyypyrimidine tract bindi | chr1       | 1p34.3         | 35649200  | 35658743  | 9544   | yes                |                     | papillary renal                                                                                        |
| CSF3R       | colony stimulating factor 3 receptor (granulocyte)                 | chr1       | 1p35-p34.3     | 36931643  | 36948915  | 17273  | yes                |                     | aAML, chronic neutrophilic leukaemia                                                                   |
| MYCL1       | v-myc myelocytomatosis viral oncogene homolog 1, lung carc         | chr1       | 1p34.3         | 40361095  | 40367687  | 6593   | yes                |                     | small cell lung carcinoma                                                                              |
| TAL1        | T-cell acute lymphocytic leukemia 1 (SCL)                          | chr1       | 1p32           | 47681961  | 47698007  | 16047  | yes                |                     | lymphoblastic leukaemia/biphasic                                                                       |
| CDKN2C      | cyclin-dependent kinase inhibitor 2C (p18, inhibits CDK4)          | chr1       | 1p32           | 51434366  | 51440309  | 5944   | yes                |                     | glioma, MM                                                                                             |
| EPS15       | epidermal growth factor receptor pathway substrate 15 (AF1)        | chr1       | 1p32           | 51819934  | 51984995  | 165062 | yes                |                     | ALL                                                                                                    |
| JUN         | jun oncogene                                                       | chr1       | 1p32-p31       | 59246462  | 59249785  | 3324   | yes                |                     | sarcoma                                                                                                |
| JAK1        | Janus kinase 1                                                     | chr1       | 1p32.3-p31.3   | 65298905  | 65432619  | 133715 | yes                |                     | ALL                                                                                                    |
| BCL10       | B-cell CLL/lymphoma 10                                             | chr1       | 1p22           | 85731459  | 85742587  | 11129  | yes                |                     | MALT                                                                                                   |
| RBM15       | RNA binding motif protein 15                                       | chr1       | 1p13           | 110881944 | 110889303 | 7360   | yes                |                     | acute megakaryocytic leukaemia                                                                         |
| TRIM33      | tripartite motif-containing 33 (PTC7,TIF1G)                        | chr1       | 1p13           | 114935398 | 115053781 | 118384 | yes                |                     | papillary thyroid                                                                                      |
| NRAS        | neuroblastoma RAS viral (v-ras) oncogene homolog                   | chr1       | 1p13.2         | 115247084 | 115259515 | 12432  | yes                |                     | melanoma, MM, AML, thyroid                                                                             |
| ARNT        | aryl hydrocarbon receptor nuclear translocator                     | chr1       | 1q21           | 150782180 | 150849244 | 67065  | yes                |                     | AML                                                                                                    |
| TPM3        | tropomyosin 3                                                      | chr1       | 1q22-q23       | 154127779 | 154164611 | 36833  | yes                |                     | papillary thyroid, ALCL, NSCLC                                                                         |
| MUC1        | mucin 1, transmembrane                                             | chr1       | 1q21           | 155158299 | 155162706 | 4408   | yes                |                     | B-NHL                                                                                                  |
| PRCC        | papillary renal cell carcinoma (translocation-associated)          | chr1       | 1q21.1         | 156737273 | 156770609 | 33337  | yes                |                     | papillary renal                                                                                        |
| NTRK1       | neurotrophic tyrosine kinase, receptor, type 1                     | chr1       | 1q21-q22       | 156785541 | 156851642 | 66102  | yes                |                     | papillary thyroid                                                                                      |
| SDHC        | succinate dehydrogenase complex, subunit C, integral memb          | chr1       | 1q21           | 161284165 | 161334535 | 50371  |                    | yes                 |                                                                                                        |
| FCGR2B      | Fc fragment of IgG, low affinity IIb, receptor for (CD32)          | chr1       | 1q23           | 161632904 | 161648444 | 15541  | yes                |                     | ALL                                                                                                    |
| PBX1        | pre-B-cell leukemia transcription factor 1                         | chr1       | 1q23           | 164528596 | 164854300 | 325705 | yes                |                     | pre B-ALL, myoepithelioma                                                                              |
| ABL2        | v-abl Abelson murine leukemia viral oncogene homolog 2             | chr1       | 1q24-q25       | 179068461 | 179198819 | 130359 | yes                |                     | AML                                                                                                    |
| TPR         | translocated promoter region                                       | chr1       | 1q25           | 186280785 | 186344864 | 64080  | yes                |                     | papillary thyroid                                                                                      |
| PTPRC       | protein tyrosine phosphatase, receptor type, C                     | chr1       | 1q31-q32       | 198608097 | 198726605 | 118509 | yes                |                     | T-ALL                                                                                                  |
| MDM4        | Mdm4 p53 binding protein homolog                                   | chr1       | 1q32           | 204485506 | 204677661 | 192156 | yes                |                     | glioblastoma, bladder, retinoblastoma                                                                  |
| ELK4        | ELK4, ETS-domain protein (SRF accessory protein 1)                 | chr1       | 1q32           | 205566694 | 205649630 | 82937  | yes                |                     | prostate                                                                                               |
| SLC45A3     | solute carrier family 45, member 3                                 | chr1       | 1q32           | 205592803 | 205649630 | 56828  | yes                |                     | prostate                                                                                               |
| H3F3A       | H3 histone, family 3A                                              | chr1       | 1q42.12        | 226250407 | 226259703 | 9297   | yes                |                     | glioma                                                                                                 |
| PRDM1       | PR domain containing 1, with ZNF domain                            | chr6       | 6q21           | 106534194 | 106557814 | 23621  | yes                |                     | DLBCL                                                                                                  |
| ROS1        | v-ros UR2 sarcoma virus oncogene homolog 1 (avian)                 | chr6       | 6q22           | 117609529 | 117747018 | 137490 | yes                |                     | glioblastoma, NSCLC                                                                                    |
| GOPC        | golgi associated PDZ and coiled-coil motif containing              | chr6       | 6q21           | 117639350 | 117923705 | 284356 | yes                |                     | glioblastoma                                                                                           |
| STL         | Six-twelve leukemia gene                                           | chr6       | 6q23           | 125229391 | 125284173 | 54783  | yes                |                     | B-ALL                                                                                                  |
| MYB         | v-myb myeloblastosis viral oncogene homolog                        | chr6       | 6q22-23        | 135502452 | 135540311 | 37860  | yes                |                     | adenoid cystic carcinoma                                                                               |
| TNFAIP3     | tumor necrosis factor, alpha-induced protein 3                     | chr6       | 6q23           | 138188324 | 138204451 | 16128  | yes                |                     | marginal zone B-cell lymphomas, Hodgkin lymphoma, PMBL                                                 |
| ECT2L       | epithelial cell transforming sequence 2 oncogene-like              | chr6       | 6q24.1         | 139117247 | 139225207 | 107961 | yes                |                     | ETP ALL                                                                                                |
| EZR         | ezrin                                                              | chr6       | 6q25.3         | 159186772 | 159240456 | 53685  | yes                |                     | NSCLC                                                                                                  |
| FGFR10P     | FGFR1 oncogene partner (FOP)                                       | chr6       | 6q27           | 167412804 | 167455906 | 43103  | yes                |                     | MPD, NHL                                                                                               |
| MLLT4       | myeloid/lymphoid or mixed-lineage leukemia (trithorax homol        | chr6       | 6q27           | 168227670 | 168372700 | 145031 | yes                |                     | AL                                                                                                     |
| HRAS        | v-Ha-ras Harvey rat sarcoma viral oncogene homolog                 | chr11      | 11p15.5        | 532241    | 535550    | 3310   | yes                | yes                 | infrequent sarcomas, rare other tumour types                                                           |
| NUP98       | nucleoporin 98kDa                                                  | chr11      | 11p15          | 3696239   | 3819022   | 122784 | yes                |                     | AML                                                                                                    |
| LMO1        | LIM domain only 1 (rhotobin 1) (RBTN1)                             | chr11      | 11p15          | 8245850   | 8290182   | 44333  | yes                | yes                 | T-ALL, neuroblastoma                                                                                   |
| KDM5A       | lysine (K)-specific demethylase 5A, JARID1A                        | chr12      | 12p11          | 389222    | 498621    | 109400 | yes                |                     | AML                                                                                                    |
| CCND2       | cyclin D2                                                          | chr12      | 12p13          | 4382901   | 4414522   | 31622  | yes                |                     | NHL,CLL                                                                                                |
| ZNF384      | zinc finger protein 384 (CIZ/NMP4)                                 | chr12      | 12p13          | 6775642   | 6798738   | 23097  | yes                |                     | ALL                                                                                                    |
| ETV6        | ets variant gene 6 (TEL oncogene)                                  | chr12      | 12p13          | 11802787  | 12268261  | 465475 | yes                |                     | congenital fibrosarcoma, multiple leukaemia and lymphoma, secretory breast, MDS, ALL                   |
| KRAS        | v-Ki-ras2 Kirsten rat sarcoma 2 viral oncogene homolog             | chr12      | 12p12.1        | 25357722  | 25403865  | 46144  | yes                |                     | pancreatic, colorectal, lung, thyroid, AML, other tumour types                                         |
| TRA@        | T cell receptor alpha locus                                        | chr14      | 14q11.2        | 22362569  | 22534581  | 172013 | yes                |                     | T-ALL                                                                                                  |
| CHEK2       | CHK2 checkpoint homolog (S. pombe)                                 | chr22      | 22q12.1        | 29083730  | 29137822  | 54093  |                    | yes                 |                                                                                                        |
| EWSR1       | Ewing sarcoma breakpoint region 1 (EWS)                            | chr22      | 22q12          | 29663997  | 29695515  | 32519  | yes                |                     | Ewing sarcoma, desmoplastic small round cell tumour , ALL, clear cell sarcoma, sarcoma, myoepithelioma |
| NF2         | neurofibromatosis type 2 gene                                      | chr22      | 22q12.2        | 29999544  | 30094589  | 95046  | yes                | yes                 | meningioma, acoustic neuroma, renal                                                                    |
| MKL1        | megakaryoblastic leukemia (translocation) 1                        | chr22      | 22q13          | 40806284  | 41032723  | 226440 | yes                |                     | acute megakaryocytic leukaemia                                                                         |
