# Supplementary material for: First insight into the somatic mutation burden of neurofibromatosis type 2-associated grade I and grade II meningiomas: a case report comprehensive genomic study of two cranial meningiomas with vastly different clinical presentation
Source: Springer Nature journal article supplement (doi:10.1186/s12885-017-3127-6), 2017-02-13
Supplement: MOESM5 [file 12063180]

**Additional File 5.** Mutations selected for Sanger verification.

| Gene Name       | Chromosome | Position  | Reference allele | Alternative allele | Type of mutation | ConsScore | PolyPhen          | SIFT        | CADD-Score | SampleID                               |
|-----------------|------------|-----------|------------------|--------------------|------------------|-----------|-------------------|-------------|------------|----------------------------------------|
| <i>IDH2</i>     | 15         | 90628543  | A                | C                  | SNV              | 7         | possibly_damaging | deleterious | 11.61      | Grade2-1, Grade2-2                     |
| <i>ADAMTSL3</i> | 15         | 84657544  | TGGAAAGT         | T                  | DEL              | 7         | NA                | NA          | 17.6       | Grade2-1, Grade2-2, Grade2-3, Grade2-4 |
| <i>SMYD1</i>    | 2          | 88387407  | T                | G                  | SNV              | 7         | benign            | deleterious | 18.33      | Grade2-2                               |
| <i>EPHB3</i>    | 3          | 184297360 | G                | T                  | SNV              | 7         | probably_damaging | deleterious | 19.15      | Grade1                                 |
| <i>SLC35B1</i>  | 17         | 47783669  | A                | C                  | SNV              | 7         | benign            | tolerated   | 21.9       | Grade2-2                               |
| <i>ECEL1</i>    | 2          | 233348878 | A                | G                  | SNV              | 7         | probably_damaging | tolerated   | 24.1       | Grade2-4                               |
| <i>BRD8</i>     | 5          | 137503737 | C                | A                  | SNV              | 7         | probably_damaging | tolerated   | 24.2       | Grade1                                 |
| <i>SASH1</i>    | 6          | 148792578 | T                | A                  | SNV              | 7         | probably_damaging | deleterious | 25         | Grade2-2                               |
| <i>IRF2</i>     | 4          | 185340674 | A                | C                  | SNV              | 7         | benign            | deleterious | 25.2       | Grade2-1                               |
| <i>CAPN5</i>    | 11         | 76804840  | G                | A                  | SNV              | 7         | possibly_damaging | tolerated   | 25.9       | Grade2-1, Grade2-2, Grade2-3, Grade2-4 |
| <i>SLC4A3</i>   | 2          | 220504339 | C                | CA                 | INS              | 7         | NA                | NA          | 37         | Grade2-1                               |
